# Supplementary material for: Transcriptome and expression profiling analysis of Leuciscus waleckii : an exploration of the alkali-adapted mechanisms of a freshwater teleost
Source: Royal Society of Chemistry journal article supplement (doi:10.1039/c3mb70318e), 2013-12-04
Supplement: c3mb70318e.xlsx [file c3mb70318e.xlsx]

## Sheet: Sheet1
Additional Table 1. Statistically enrichment KEGG pathways of L. waleckii
Class	Pathway	L. waleckii .KO	D. rerio.KO	Pvalue
Amino Acid Metabolism	Alanine, aspartate and glutamate metabolism	24	22	0
	Valine, leucine and isoleucine degradation	38	36	0
	Lysine degradation	31	29	0
	Phenylalanine, tyrosine and tryptophan biosynthesis	5	4	0
	Arginine and proline metabolism	32	33	0.000557
Biosynthesis of Other Secondary Metabolites	Streptomycin biosynthesis	4	4	0
	Butirosin and neomycin biosynthesis	1	1	0
	Tropane, piperidine and pyridine alkaloid biosynthesis	5	4	0
Carbohydrate Metabolism	Glycolysis / Gluconeogenesis	28	28	0
	Citrate cycle (TCA cycle)	23	21	0
	Pentose phosphate pathway	16	16	0
	Ascorbate and aldarate metabolism	6	4	0
	Inositol phosphate metabolism	28	27	0
	Pyruvate metabolism	23	19	0
	Glyoxylate and dicarboxylate metabolism	16	16	0
	Propanoate metabolism	22	20	0
	Amino sugar and nucleotide sugar metabolism	31	33	0.005275
	Starch and sucrose metabolism	17	18	0.016978
	Galactose metabolism	14	15	0.03355
Cell Communication	Tight junction	52	56	0.001703
Development	Osteoclast differentiation	59	67	0.025438
Digestive System	Vitamin digestion and absorption	10	4	0
	Mineral absorption	17	12	0
Endocrine System	Insulin signaling pathway	62	69	0.007717
Energy Metabolism	Carbon fixation in photosynthetic organisms	14	12	0
	Oxidative phosphorylation	96	100	3.47e-07
Environmental Adaptation	Circadian rhythm - plant	2	2	0
Excretory System	Proximal tubule bicarbonate reclamation	10	7	0
	Collecting duct acid secretion	11	11	0
Folding, Sorting and Degradation	Sulfur relay system	5	4	0
	Protein processing in endoplasmic reticulum	103	90	0
	Proteasome	40	41	8.94e-05
	RNA degradation	48	51	0.000894
Glycan Biosynthesis and Metabolism	Other glycan degradation	12	12	0
	Glycosaminoglycan biosynthesis - keratan sulfate	8	8	0
	Other types of O-glycan biosynthesis	13	14	0.042095
Immune System	Leukocyte transendothelial migration	60	60	0
	Intestinal immune network for IgA production	16	14	0
	Fc gamma R-mediated phagocytosis	42	46	0.009672
	Fc epsilon RI signaling pathway	29	32	0.029238
	Antigen processing and presentation	28	31	0.034695
Lipid Metabolism	Fatty acid biosynthesis	4	3	0
	Fatty acid metabolism	25	22	0
	Synthesis and degradation of ketone bodies	5	5	0
	Ether lipid metabolism	11	10	0
	Arachidonic acid metabolism	23	16	0
	Linoleic acid metabolism	6	5	0
	alpha-Linolenic acid metabolism	4	4	0
	Glycerophospholipid metabolism	35	37	0.002347
	Fatty acid elongation	15	16	0.026738
	Glycerolipid metabolism	20	22	0.045264
Metabolism of Cofactors and Vitamins	Ubiquinone and other terpenoid-quinone biosynthesis	7	7	0
Metabolism of Cofactors and Vitamins	Thiamine metabolism	3	3	0
	Riboflavin metabolism	8	5	0
	Nicotinate and nicotinamide metabolism	11	10	0
	Pantothenate and CoA biosynthesis	8	8	0
	Biotin metabolism	2	2	0
	Porphyrin and chlorophyll metabolism	18	19	0.013528
Metabolism of Other Amino Acids	beta-Alanine metabolism	19	19	0
	Glutathione metabolism	20	20	0
Metabolism of Terpenoids and Polyketides	Geraniol degradation	4	4	0
Nucleotide Metabolism	Pyrimidine metabolism	61	69	0.019606
Signal Transduction	Phosphatidylinositol signaling system	31	29	0
	Notch signaling pathway	23	25	0.025541
Transcription	Spliceosome	107	106	0
	Basal transcription factors	29	30	0.001105
Translation	Ribosome biogenesis in eukaryotes	56	22	0
	RNA transport	106	66	0
	mRNA surveillance pathway	52	23	0
	Aminoacyl-tRNA biosynthesis	22	23	0.005447
	Ribosome	68	78	0.031144
Transport and Catabolism	Phagosome	66	67	2.25e-07
	Endocytosis	110	125	0.004948
	Lysosome	79	89	0.00793
Xenobiotics Biodegradation and Metabolism	Bisphenol degradation	3	3	0
	Chloroalkane and chloroalkene degradation	4	4	0
	Naphthalene degradation	1	1	0
	Nitrotoluene degradation	1	1	0
	Caprolactam degradation	6	6	0
	Metabolism of xenobiotics by cytochrome P450	11	9	0
	Drug metabolism - cytochrome P450	10	9	0
