# Supplementary material for: Transcriptome and expression profiling analysis of Leuciscus waleckii : an exploration of the alkali-adapted mechanisms of a freshwater teleost
Source: Royal Society of Chemistry journal article supplement (doi:10.1039/c3mb70318e), 2013-12-04
Supplement: c3mb70318e_2.xlsx [file c3mb70318e_2.xlsx]

## Sheet: Sheet1
Additional table 2. Obviously changed contigs in gills of L. waleckii
contig	alkaline reads number (average)	freshwater reads number (average)	p-value	NR annotation
isotig08295	109.6	0	1.48826e-23	PREDICTED: transportin-2-like, partial
isotig21005	29.4	0	1.7761e-07	LOW QUALITY PROTEIN: conserved hypothetical protein
isotig06605	26	0	1.12903e-06	unnamed protein product
isotig06606	26	0	1.12903e-06	unnamed protein product
isotig06607	25.4	0	1.53568e-06	unnamed protein product
isotig06920	22.2	0	5.83725e-06	PREDICTED: cysteine/serine-rich nuclear protein 2
isotig06921	22.6	0	6.52376e-06	PREDICTED: cysteine/serine-rich nuclear protein 2
isotig29447	19.6	0	3.13807e-05	peptidyl-prolyl cis-trans isomerase FKBP5
isotig15799	15.4	0	0.00029425	cysteine/serine-rich nuclear protein 1
isotig18952	13	0	0.000700456	PREDICTED: glycerophosphodiester phosphodiesterase domain-containing protein 5-like
isotig07328	12	0	0.00186751	PREDICTED: cAMP-responsive element modulator
isotig18924	10.4	0	0.00361829	T-box 21
isotig08479	9	0	0.00412911	PREDICTED: serine/threonine-protein kinase SIK2
isotig17115	10.2	0	0.00503604	novel protein similar to vertebrate scinderin (SCIN)
isotig10816	9.2	0	0.00564282	hypothetical protein LOC553743
isotig10817	9	0	0.00631181	hypothetical protein LOC553743
isotig13728	7.8	0	0.00796653	novel protein (zgc:63886)
isotig16587	8.2	0	0.00990524	glutathione peroxidase 3 (plasma)
isotig29317	7.4	0	0.00995302	Equilibrative nucleoside transporter 2
isotig13131	7.4	0	0.00995302	PREDICTED: fibulin-2
isotig10870	9.6	0	0.0105953	E4 binding protein 4-2
isotig10871	9.6	0	0.0105953	E4 binding protein 4-2
isotig27763	8	0	0.0110936	connexin 28.8
isotig15886	8	0	0.0110936	novel protein similar to vertebrate kinesin family member 5A (KIF5A)
isotig15490	8.2	0	0.0123825	discs large homolog 1-like protein
isotig06581	7	0	0.0124591	ankyrin repeat domain 57
isotig13224	9.2	0	0.0131817	spondin 1b
isotig19639	7.6	0	0.0139261	hypothetical protein LOC567972
isotig16746	6.8	0	0.0139503	DEAD (Asp-Glu-Ala-Asp) box polypeptide 3
isotig18088	9	0	0.0147032	PREDICTED: NUAK family SNF1-like kinase 1-like
isotig15654	8.2	0	0.0153341	PREDICTED: long-chain-fatty-acid--CoA ligase 3
isotig22102	6.6	0	0.0156283	cryptochrome 1b
isotig00059	6.6	0	0.0156283	mRNA-decapping enzyme 2
isotig11113	6.6	0	0.0156283	novel protein
isotig17579	6.8	0	0.0220188	bone morphogenetic protein receptor, type II a (serine/threonine kinase)
isotig08846	6	0	0.0220476	CD8 alpha chain
isotig14149	6	0	0.0220476	PREDICTED: ATP-binding cassette sub-family A member 12
isotig16465	6	0	0.0220476	TPA: transposase domain-containing protein
isotig15098	8.2	0	0.0227603	pre-mRNA-splicing factor ATP-dependent RNA helicase PRP16
isotig16287	6.4	0	0.0277355	conserved hypothetical protein
isotig17131	5.6	0	0.0278161	PREDICTED: probable histone-lysine N-methyltransferase ASH1L
isotig15987	7.8	0	0.0283167	DNA topoisomerase 2-beta
isotig13406	7.8	0	0.0283167	hypothetical protein LOC568712
isotig20926	6.6	0	0.0307199	dolichyldiphosphatase 1
isotig17533	6.2	0	0.0311427	PREDICTED: LOW QUALITY PROTEIN: probable phospholipid-transporting ATPase IC
isotig15429	6.2	0	0.0311427	PREDICTED: multidrug resistance protein 1
isotig13827	5.4	0	0.031274	beta-3-galactosyltransferase
isotig22367	5.4	0	0.031274	LOC553370 protein
isotig15689	5.4	0	0.031274	plasma membrane calcium-transporting ATPase 1
isotig18058	5.4	0	0.031274	runt-related transcription factor 3
isotig13653	6.8	0	0.0336592	PREDICTED: retrotransposable element Tf2 155 kDa protein type 1-like
isotig16170	5.2	0	0.0351857	PREDICTED: disks large homolog 3-like
isotig06298	7.4	0	0.0352266	Golgi integral membrane protein 4
isotig16403	7.4	0	0.0352266	LOC100150665 protein
isotig16012	6.6	0	0.0376763	novel protein similar to vertebrate kinesin family member 5A (KIF5A)
isotig04672	6.6	0	0.0376763	PREDICTED: epidermis-type lipoxygenase 3-like
isotig04671	6.6	0	0.0376763	PREDICTED: epidermis-type lipoxygenase 3-like
isotig07901	7.2	0	0.0392884	epithelial splicing regulatory protein 1
isotig07902	7.2	0	0.0392884	epithelial splicing regulatory protein 1
isotig06299	7.2	0	0.0392884	Golgi integral membrane protein 4
isotig12398	7.2	0	0.0392884	period circadian protein homolog 3
isotig18674	7.2	0	0.0392884	probable global transcription activator SNF2L2 isoform 2
isotig12550	5.8	0	0.0393015	hypothetical protein LOC555595
isotig25511	5.8	0	0.0393015	novel protein
isotig25884	5.8	0	0.0393015	PREDICTED: hypothetical protein LOC497432
isotig15899	5	0	0.0396148	novel protein similar to vertebrate signal-induced proliferation-associated 1 like family
isotig15293	6.4	0	0.0421772	PREDICTED: e3 ubiquitin-protein ligase RNF182-like isoform 1
isotig28182	6.4	0	0.0421772	Putative nuclease HARBI1
isotig07194	7	0	0.0438168	sarcolemmal membrane-associated protein
isotig17246	5.6	0	0.0441721	pl10
isotig13093	5.6	0	0.0441721	PREDICTED: ATP-binding cassette sub-family A member 12
isotig07082	5.6	0	0.0441721	PREDICTED: multidrug resistance protein 1
isotig07083	5.6	0	0.0441721	PREDICTED: multidrug resistance protein 1
isotig13722	4.8	0	0.0446342	unnamed protein product
isotig31814	6.2	0	0.0472205	PREDICTED: hypothetical protein LOC100331153
isotig08767	5.4	0	0.0496631	novel protein similar to polo-like kinase 2 (Drosophila) (PLK2, zgc:165644)
isotig13992	5.4	0	0.0496631	type-1 angiotensin II receptor-associated-like
isotig12917	13.6	1	0.00181238	LOC563048 protein
isotig12433	11.6	1	0.00529058	ADP-ribosylation factor-like protein 4D
isotig11695	11.2	1	0.0065533	PREDICTED: hypothetical protein LOC100536892
isotig08178	10.6	1	0.00903199	stearoyl-CoA desaturase b
isotig20347	8.8	1	0.0235756	prostaglandin G/H synthase 1
isotig10825	8.4	1	0.0291523	zinc finger CCCH-type with G patch domain-containing protein
isotig06763	8	1	0.0360323	PREDICTED: KIAA2004 protein-like
isotig14464	8	1	0.0360323	PREDICTED: LON peptidase N-terminal domain and RING finger protein 1
isotig14434	7.6	1	0.0445135	PREDICTED: A disintegrin and metalloproteinase with thrombospondin motifs 1
isotig16881	7.6	1	0.0445135	PREDICTED: zinc finger protein 2 homolog
isotig15178	7.6	1	0.0445135	RecName: Full=Double-stranded RNA-binding protein Staufen homolog 2
isotig07193	7.4	1	0.0494651	sarcolemmal membrane-associated protein
isotig02549	41	1.2	1.55288e-09	complement factor B/C2B
isotig28058	27.8	1.2	1.47146e-06	unknown
isotig20786	15.2	1.2	0.00114472	YdjC homolog
isotig21520	14.4	1.2	0.00174705	sterile alpha motif domain-containing protein 9-like
isotig11344	13.4	1.2	0.00296104	PREDICTED: hypothetical protein LOC100538131
isotig08005	10	1.2	0.0175815	granzyme A/K
isotig08006	10	1.2	0.0175815	granzyme A/K
isotig05761	9.4	1.2	0.0239989	claudin k
isotig12541	8.8	1.2	0.0327127	NIPA-like protein 3
isotig03488	8.6	1.2	0.0362581	Caspy2
isotig03487	8.6	1.2	0.0362581	novel protein similar to caspase b (caspb)
isotig25132	8.4	1.2	0.0401801	choline transporter-like protein 2
isotig27732	8.4	1.2	0.0401801	PREDICTED: NACHT, LRR and PYD domains-containing protein 3-like
isotig15318	8.2	1.2	0.0445174	glycerol-3-phosphate transporter
isotig16034	8.2	1.2	0.0445174	Krueppel-like factor 13
isotig06953	8.2	1.2	0.0445174	polo-like kinase 3 (Drosophila)
isotig05663	8.2	1.2	0.0445174	sortilin 1, like
isotig04194	8	1.2	0.0493124	cytosolic phospholipase A2 gamma-like
isotig03671	25.6	1.4	7.11967e-06	PREDICTED: ERBB receptor feedback inhibitor 1-like
isotig03672	25.6	1.4	7.11967e-06	PREDICTED: ERBB receptor feedback inhibitor 1-like
isotig03673	25.6	1.4	7.11967e-06	PREDICTED: ERBB receptor feedback inhibitor 1-like
isotig03674	25.6	1.4	7.11967e-06	PREDICTED: ERBB receptor feedback inhibitor 1-like
isotig14451	13.6	1.4	0.00381848	PREDICTED: GTPase IMAP family member 8-like
isotig22110	11.4	1.4	0.0118402	eomesodermin homolog b
isotig10833	11	1.4	0.0145202	PREDICTED: hypothetical protein LOC100331484
isotig13815	11	1.4	0.0145202	receptor-interacting serine/threonine-protein kinase 4
isotig12848	10.2	1.4	0.0217942	potassium inwardly-rectifying channel, subfamily J, member 1
isotig04441	10	1.4	0.0241121	PREDICTED: splicing factor 3B subunit 1 isoform 1
isotig18860	9.8	1.4	0.0266711	PREDICTED: mitogen-activated protein kinase kinase kinase kinase 3, partial
isotig13561	9.4	1.4	0.0326122	PREDICTED: cingulin-like 1
isotig17702	9	1.4	0.0398404	Solute carrier family 4, anion exchanger, member 1
isotig22073	12.4	1.6	0.00978593	eomesodermin
isotig11340	11.8	1.6	0.0132168	PREDICTED: neuroblast differentiation-associated protein AHNAK
contig03710	10.8	1.6	0.0217277	novel NACHT domain containing protein
isotig13736	10.4	1.6	0.0264676	PREDICTED: similar to GABA transporter
isotig16550	9.6	1.6	0.0391591	hCG2004136
isotig29555	9.6	1.6	0.0391591	novel protein similar to vertebrate solute carrier family 12 (sodium/chloride transporters), member 3 (SLC12A3)
isotig10791	9.4	1.6	0.0431589	PREDICTED: hypothetical protein LOC555795 isoform 2
isotig20429	56.4	1.8	1.89477e-12	DENN/MADD domain containing 2D
isotig16156	16	1.8	0.00220112	Per2 protein
isotig16448	13.2	1.8	0.00890817	regulator of G-protein signaling 2
isotig14878	12.8	1.8	0.0108491	PREDICTED: LOW QUALITY PROTEIN: ral GTPase-activating protein subunit beta
isotig13072	12.4	1.8	0.0132026	nuclear receptor subfamily 4 group A member 1
isotig14309	12	1.8	0.0160532	novel protein similar to vertebrate HRAS-like suppressor (HRASLS)
isotig13444	9.8	1.8	0.0462206	beta-hexosaminidase subunit alpha
isotig30765	24.2	2	4.80294e-05	hypothetical protein LOC641564
isotig14063	16.4	2	0.00248289	PREDICTED: fibroblast growth factor-binding protein 1
isotig09151	14.4	2	0.00664434	PREDICTED: hypothetical protein LOC100538306
isotig16910	11.4	2	0.0280356	PREDICTED: neuroblast differentiation-associated protein AHNAK
isotig13102	10.4	2	0.0447101	Bcl2 antagonist of cell death
isotig10498	10.4	2	0.0447101	specifically androgen-regulated gene protein isoform 1
isotig13699	10.2	2	0.0490366	unnamed protein product
isotig30894	17.8	2.2	0.0016974	PREDICTED: hypothetical protein LOC100005901
isotig21120	15.2	2.2	0.00601729	hypothetical protein NEMVEDRAFT_v1g3459
isotig12121	13	2.2	0.017118	ring finger protein 122-like
contig08572	12.8	2.2	0.0187979	PREDICTED: hypothetical protein LOC100148757 isoform 2
isotig06222	12.2	2.2	0.024852	PREDICTED: CD302 antigen-like
isotig11790	12.2	2.2	0.024852	PREDICTED: hypothetical protein
isotig20130	12	2.2	0.0272603	arrestin domain containing 3-like
isotig10578	11.4	2.2	0.0359116	hypothetical protein LOC100101649
isotig11794	11.4	2.2	0.0359116	unnamed protein product
isotig15272	11.2	2.2	0.0393419	PREDICTED: protein G7c
isotig12792	29.2	2.4	7.80581e-06	BTEB transcription factor
isotig13059	20.2	2.4	0.000712174	PREDICTED: collagen alpha-6(IV) chain
isotig13812	18.4	2.4	0.00171554	arrestin domain-containing protein 3
isotig19113	15.2	2.4	0.0079304	cAMP-specific 3&apos;,5&apos;-cyclic phosphodiesterase 4D isoform PDE4D7
isotig17484	14.8	2.4	0.0095689	PREDICTED: Purkinje cell protein 4
isotig12414	12.4	2.4	0.0289078	frizzled-1
isotig24845	11.4	2.4	0.0452415	PREDICTED: zinc finger protein 36, C3H1 type-like 1-like
isotig14287	23.4	2.6	0.000202555	c-Fos
isotig18610	20.2	2.6	0.000967284	chemokine (C-C motif) ligand 20
isotig05922	19.6	2.6	0.00129204	DNA damage-inducible transcript 4 protein
isotig07214	16.4	2.6	0.00590067	serine/threonine-protein kinase Sgk1
isotig13191	14.2	2.6	0.0162559	novel protein similar to follistatin-like 1 (fstl1, wu:fc25c04)
isotig18332	13.2	2.6	0.0254948	hypothetical protein LOC553299
isotig12078	12.8	2.6	0.0304575	transmembrane protein 45B
isotig20094	12.6	2.6	0.0332737	novel protein
isotig09190	12.2	2.6	0.0396704	hypothetical protein LOC100191015
isotig04405	12	2.6	0.0432931	unnamed protein product
isotig04406	12	2.6	0.0432931	unnamed protein product
isotig17172	17.2	2.8	0.00529242	tissue specific transplantation antigen P35B
isotig11117	15.6	2.8	0.0109986	glyoxalase domain-containing protein 5
isotig11118	15.6	2.8	0.0109986	glyoxalase domain-containing protein 5
isotig06223	12.8	2.8	0.0379422	PREDICTED: CD302 antigen-like
isotig15371	12.6	2.8	0.0413502	Mitogen-activated protein kinase 14a
isotig07345	12.4	2.8	0.0450477	ADP-ribosylation factor-like 5C
isotig12222	12.4	2.8	0.0450477	novel protein (zgc:113196)
isotig19826	12.2	2.8	0.0490572	cAMP-dependent protein kinase type I-alpha regulatory subunit
isotig10913	12.2	2.8	0.0490572	novel protein similar to vertebrate granzyme family
isotig10914	12.2	2.8	0.0490572	novel protein similar to vertebrate granzyme family
isotig06680	27.6	3	4.89446e-05	PREDICTED: G-protein coupled receptor 64-like isoform 1
isotig06681	27	3	6.56785e-05	PREDICTED: G-protein coupled receptor 64-like isoform 8
isotig12023	17.6	3	0.0056876	DNA-damage-inducible transcript 3
isotig09530	13	3	0.0429049	Uncharacterized protein
isotig13971	12.8	3	0.046665	PREDICTED: hypothetical protein LOC569976
isotig13803	19	3.2	0.00387211	PREDICTED: protein phosphatase 1 regulatory subunit 3C-B
isotig16064	17.4	3.2	0.00794246	growth arrest and DNA-damage-inducible, beta b
isotig07060	15.2	3.2	0.020768	basal cell adhesion molecule
isotig07061	15.2	3.2	0.020768	basal cell adhesion molecule
isotig08623	0	3.2	0.0483451	hypothetical protein LOC569865
isotig22983	0	3.2	0.0483451	myosin VIa
isotig23837	0	3.2	0.0483451	PREDICTED: TRIO and F-actin-binding protein-like
isotig30516	0	3.2	0.0483451	RecName: Full=Mediator of RNA polymerase II transcription subunit 24; AltName: Full=Mediator complex subunit 24; AltName: Full=Protein lessen; AltName: Full=Thyroid hormone receptor-associated protein 4 homolog; AltName: Full=Trap100 homolog
isotig20791	0	3.2	0.0483451	regulator of G-protein signaling 16
isotig25293	27.4	3.4	0.000100586	PREDICTED: hypothetical protein LOC100332029
isotig13517	27.2	3.4	0.000110687	PREDICTED: hypothetical protein LOC324610
isotig11571	15	3.4	0.0278637	PREDICTED: dynamin-binding protein-like
isotig11718	14.2	3.4	0.0387882	solute carrier family 12 member 3
isotig25338	0	3.4	0.0409869	adenosine 3&apos;-phospho 5&apos;-phosphosulfate transporter 1
isotig19974	0	3.4	0.0409869	dead eye
isotig26846	0	3.4	0.0409869	PREDICTED: structural maintenance of chromosomes protein 6
isotig19137	0	3.4	0.0409869	RecName: Full=Glycosyltransferase-like domain-containing protein 1
isotig09289	0	3.4	0.0409869	transmembrane protein 18
isotig24065	0	3.4	0.0409869	unnamed protein product
isotig11756	24.2	3.6	0.000603277	Cysteine/serine-rich nuclear protein 1
isotig06072	23.2	3.6	0.000955464	PREDICTED: hypothetical protein LOC571902
isotig06071	23.2	3.6	0.000955464	PREDICTED: hypothetical protein LOC571902
isotig06862	19	3.6	0.00626487	E4 binding protein 4-6
isotig06863	19	3.6	0.00626487	E4 binding protein 4-6
isotig12307	17	3.6	0.014803	PREDICTED: tribbles homolog 1-like
isotig05671	16.2	3.6	0.0207146	LIM domain only protein 7
isotig17524	16	3.6	0.0225123	PREDICTED: hypothetical protein LOC796198
isotig16634	15.4	3.6	0.0288397	dual specificity protein phosphatase 4
isotig11694	14.4	3.6	0.0432751	lysine (K)-specific demethylase 6B, b
isotig04892	14.4	3.6	0.0432751	PREDICTED: sodium/glucose cotransporter 5-like
isotig25261	0	3.6	0.0489108	hypothetical protein LOC100192215
isotig29006	0	3.6	0.0489108	poliovirus receptor-related 1b
isotig13411	27.6	3.8	0.000163706	urea transporter 2
isotig13240	22.2	3.8	0.00193588	elongation of very long chain fatty acids protein 7
isotig18212	16	3.8	0.027441	growth arrest and DNA damage-inducible protein GADD45 gamma
isotig20947	15.8	3.8	0.029755	PREDICTED: probable G-protein coupled receptor 116-like
isotig31195	0	3.8	0.0414596	angiogenic factor with G patch and FHA domains 1
isotig08573	0	3.8	0.0414596	hypothetical protein LOC564690
isotig18998	0	3.8	0.0414596	PREDICTED: suppressor of cytokine signaling 1
isotig18266	40.4	4	4.74431e-07	PREDICTED: hypothetical protein LOC567961
isotig32012	0	4	0.0252328	PREDICTED: f-box only protein 38-like
isotig12875	16.6	4	0.0260896	ST3Gal III-related alpha-2,3-sialyltransferase
isotig26860	0	4	0.0351796	Cenpk protein
isotig20610	0	4	0.0351796	FAD synthase
isotig19443	0	4	0.0351796	sphingosine-1-phosphate receptor 3
isotig16616	0	4	0.0486402	GON-4-like protein
isotig24003	0	4	0.0486402	protein SDA1 homolog
isotig04440	15	4	0.0490213	splicing factor 3b subunit 1, 155kDa
contig00179	28.6	4.2	0.000178709	ORF2-encoded protein
isotig13811	19.4	4.2	0.0101495	sulfide:quinone oxidoreductase, mitochondrial
isotig00972	19	4.2	0.0119705	PREDICTED: butyrophilin subfamily 1 member A1-like
isotig07981	17.6	4.2	0.021132	S-adenosylhomocysteine hydrolase-like 1
isotig26092	0	4.2	0.0215314	PREDICTED: probable methyltransferase BCDIN3D-like
isotig17717	0	4.2	0.0298802	ELG protein
isotig24380	0	4.2	0.0413812	integrin, beta 4
isotig16058	0	4.2	0.0413812	metaxin-2
isotig17107	0	4.2	0.0413812	ORF2-encoded protein
isotig21631	0	4.2	0.0413812	PREDICTED: solute carrier family 2, facilitated glucose transporter member 1
isotig09430	15.6	4.2	0.0462816	egl nine homolog 1
isotig09391	15.4	4.2	0.0499551	immunity-related GTPase family, e4
isotig06762	35.6	4.4	9.05002e-06	PREDICTED: sterile alpha motif domain containing 9-like
isotig10832	21.8	4.4	0.004598	PREDICTED: hypothetical protein LOC100331484
isotig05782	21.4	4.4	0.00543975	LOC565984 protein
isotig12647	20.6	4.4	0.00759118	Transducer of ERBB2, 1b
isotig20783	0	4.4	0.0254028	hypothetical protein LOC564061
isotig23854	0	4.4	0.0254028	PREDICTED: xanthine dehydrogenase/oxidase
isotig24341	0	4.4	0.035225	39S ribosomal protein L13, mitochondrial
isotig08848	0	4.4	0.035225	PREDICTED: mast cell protease 4-like, partial
isotig22971	0	4.4	0.035225	unnamed protein product
isotig23881	0	4.4	0.0474478	hypothetical protein LOC550243
isotig18923	0	4.4	0.0474478	mediator of RNA polymerase II transcription subunit 25
isotig15279	0	4.4	0.0474478	PREDICTED: hypothetical protein LOC799244
isotig15889	19.8	4.6	0.0128426	PREDICTED: lymphatic vessel endothelial hyaluronic acid receptor 1
isotig15255	0	4.6	0.0405344	PREDICTED: glutamate
isotig17402	0	4.6	0.0405344	PREDICTED: LOW QUALITY PROTEIN: transmembrane and TPR repeat-containing protein 3
isotig31750	0	4.6	0.0405344	PREDICTED: protocadherin-12
isotig18616	0	4.6	0.0405344	PREDICTED: small subunit processome component 20 homolog, partial
isotig19741	26.2	4.8	0.00110113	BTEB transcription factor
isotig32131	22.4	4.8	0.00545674	integrin, beta 1b
isotig30173	0	4.8	0.0134867	protein tyrosine phosphatase, non-receptor type 23, a
isotig10523	19.4	4.8	0.0181436	PREDICTED: cAMP-specific 3&apos;,5&apos;-cyclic phosphodiesterase 4B, partial
isotig14789	0	4.8	0.0184089	PREDICTED: hypothetical protein LOC558609
isotig07908	0	4.8	0.0184089	PREDICTED: probable E3 ubiquitin-protein ligase MGRN1-like isoform 1
isotig07907	0	4.8	0.0184089	PREDICTED: probable E3 ubiquitin-protein ligase MGRN1-like isoform 2
isotig22783	0	4.8	0.0255647	PREDICTED: ribonuclease T2
isotig17464	1	4.8	0.0456449	amidophosphoribosyltransferase
isotig16553	1	4.8	0.0456449	PREDICTED: TNFAIP3-interacting protein 1-like
isotig04254	27	5	0.000982075	carbonic anhydrase 5B, mitochondrial
isotig04255	27	5	0.000982075	carbonic anhydrase 5B, mitochondrial
isotig04256	27	5	0.000982075	carbonic anhydrase 5B, mitochondrial
isotig10773	26.2	5	0.00138151	Egr2a protein
isotig12283	23.2	5	0.00482323	collagen alpha-5(IV) chain
isotig08200	0	5	0.0185278	PREDICTED: hypothetical protein LOC555363
contig08579	19	5	0.0252547	PREDICTED: hypothetical protein LOC100537740
isotig15125	0	5	0.029604	novel protein similar to vertebrate solute carrier family 2 (facilitated glucose transporter), member 6 (SLC2A6)
isotig20380	18.2	5	0.0340931	B-cell translocation gene 1-like
isotig08642	1	5	0.0391489	gamma-secretase subunit Aph-1b
isotig29940	1	5	0.0391489	Slc9a3.1 protein
isotig23819	25.2	5.2	0.00260785	hypothetical protein LOC100151367
isotig23300	0	5.2	0.00993366	PREDICTED: hypothetical protein LOC100333953
isotig12271	21.4	5.2	0.0120022	protein Tob1
isotig22330	0	5.2	0.0157977	dnaJ homolog subfamily C member 21
isotig18243	0	5.2	0.0157977	hypothetical protein LOC792608
isotig19719	0	5.2	0.0185917	PREDICTED: hypothetical protein LOC100534935
isotig14839	19.8	5.2	0.0221646	PREDICTED: si:dkeyp-12a9.2
isotig19109	0	5.2	0.0253088	PREDICTED: hypothetical protein LOC561036
isotig07348	19.4	5.2	0.0257575	Flavin reductase
isotig07694	1.2	5.2	0.0434792	lipase member H precursor
isotig04858	23.2	5.4	0.00714361	myosin, heavy polypeptide 9, non-muscle
isotig14270	0	5.4	0.00853954	mini-chromosome maintenance complex-binding protein
isotig28019	0	5.4	0.00853954	novel protein
isotig14534	0	5.4	0.0114264	hypothetical protein IscW_ISCW024353
isotig15935	0	5.4	0.0216421	G patch domain containing 4-like
isotig19105	0	5.4	0.0216421	hypothetical protein LOC780840
isotig25876	0	5.4	0.0216421	vacuolar fusion protein MON1 homolog A
isotig06882	19.8	5.4	0.0262273	ubiquitin carboxyl-terminal hydrolase 2
isotig08203	1	5.4	0.0288007	far upstream element-binding protein 2
isotig12505	19.4	5.4	0.0303849	PREDICTED: DNA-binding protein SATB1-like
contig03463	19.4	5.4	0.0303849	PREDICTED: hypothetical protein LOC100535641
isotig11125	1.2	5.4	0.0374264	PREDICTED: COMM domain-containing protein 6
isotig21537	1.2	5.4	0.0374264	PREDICTED: probable E3 ubiquitin-protein ligase HERC4
isotig17878	1.2	5.4	0.0374264	ribosomal RNA-processing protein 7 homolog A
isotig06563	18.8	5.4	0.0377914	carboxy-terminal domain RNA polymerase II polypeptide A small phosphatase 1
isotig19267	1.4	5.4	0.0476037	hypothetical protein LOC790942
isotig13121	29.2	5.6	0.000756388	BMP-2-inducible protein kinase isoform 1
isotig10772	27.2	5.6	0.00173845	Egr2a protein
isotig12654	25.4	5.6	0.00361256	protein kinase, cAMP-dependent, regulatory, type I, alpha (tissue specific extinguisher 1) a
isotig07001	24.8	5.6	0.00459134	unnamed protein product
isotig04923	24	5.6	0.00629946	calpain-2 catalytic subunit
isotig17335	0	5.6	0.00734879	translation elongation factor 1 alpha
isotig13040	20	5.6	0.0286821	NEDD8-conjugating enzyme UBE2F
isotig17401	1.2	5.6	0.0322118	novel protein (zgc:65774)
isotig04356	1.4	5.6	0.0411216	60S ribosomal protein L38
isotig14936	1.4	5.6	0.0411216	beta-1,3-N-acetylglucosaminyltransferase manic fringe
isotig14947	55.6	5.8	5.59371e-09	PREDICTED: plasma kallikrein-like
isotig19995	0	5.8	0.00633044	Unknown (protein for IMAGE:8998743)
isotig08884	0	5.8	0.0158371	Si:dkey-8l13.1 protein
isotig08885	0	5.8	0.0158371	Si:dkey-8l13.1 protein
isotig03924	21	5.8	0.0234153	Osbpl1a protein
isotig03925	21	5.8	0.0234153	oxysterol-binding protein-related protein 1
isotig06638	1.2	5.8	0.0277206	deoxyribonuclease-2-alpha
isotig06958	20.2	5.8	0.0312619	Zgc:162698 protein
isotig23611	1.4	5.8	0.0355125	LOC562370 protein
isotig19697	1.4	5.8	0.0355125	serine/threonine-protein kinase OSR1
isotig07347	19.2	5.8	0.0445216	Flavin reductase
isotig05411	19.2	5.8	0.0445216	PREDICTED: interferon-induced very large GTPase 1-like
isotig05752	1.6	5.8	0.0446509	Lman1 protein
isotig07280	19	5.8	0.0477325	cyclic AMP-dependent transcription factor ATF-1
isotig10062	37.4	6	3.51181e-05	NADH dehydrogenase subunit 4
isotig07213	29.6	6	0.000985543	serine/threonine-protein kinase Sgk1
isotig07000	25.4	6	0.00529992	unnamed protein product
isotig15130	0	6	0.00714001	hypothetical protein
isotig22358	0	6	0.00714001	PREDICTED: protein G7c-like
isotig19231	0	6	0.00840059	leptin-I
isotig26526	0	6	0.00840059	nucleolar RNA-binding protein
isotig26381	22.2	6	0.0177755	ORF2-encoded protein
isotig19689	1	6	0.0181797	PREDICTED: putative GTP-binding protein Parf
isotig13969	1.2	6	0.0238532	C1r/s-B
isotig25485	1.2	6	0.0238532	N(G),N(G)-dimethylarginine dimethylaminohydrolase 2
isotig18008	1.2	6	0.0238532	N-alpha-acetyltransferase 10, NatA catalytic subunit
isotig15278	1.2	6	0.0238532	suppressor of cytokine signaling 3b
isotig06508	1.2	6	0.0238532	trafficking protein particle complex subunit 1
isotig13839	1.6	6	0.0386872	probable cation-transporting ATPase 13A1
isotig10831	1.6	6	0.0386872	tumor necrosis factor receptor superfamily member 9
isotig14935	24	6.2	0.0107996	PREDICTED: transcriptional enhancer factor TEF-5, partial
isotig18470	0	6.2	0.0116008	Gig2-like protein CauO
isotig12138	23.6	6.2	0.0125314	sodium-dependent phosphate transporter 1-B
isotig17672	1	6.2	0.015597	novel protein similar to vertebrate DENN/MADD domain containing 1 family
isotig30215	1.4	6.2	0.0264662	LOC553390 protein
isotig19125	1.6	6.2	0.0335081	Zgc:113411
isotig13553	1.8	6.2	0.0417278	CCR4-NOT transcription complex, subunit 8
isotig11524	59.6	6.4	2.13456e-09	early growth response protein 3
isotig04934	36.6	6.4	8.07607e-05	PREDICTED: protein FAM13A isoform 1
isotig04935	36.4	6.4	8.8001e-05	PREDICTED: protein FAM13A isoform 1
isotig13618	33	6.4	0.000370275	protein BTG2
isotig25549	0	6.4	0.0061468	PREDICTED: CDP-diacylglycerol--glycerol-3-phosphate 3-phosphatidyltransferase, mitochondrial-like, partial
isotig19725	1	6.4	0.0133823	PREDICTED: hypothetical protein LOC571762
isotig20935	1.2	6.4	0.0176577	Phosphatidylinositol N-acetylglucosaminyltransferase subunit Y
isotig15858	1.4	6.4	0.0228407	hypothetical protein LOC100002821
isotig30844	1.8	6.4	0.0362521	hypothetical protein LOC550326
isotig14341	20.2	6.4	0.0487136	translocator protein
contig00181	36.6	6.6	0.000101819	PREDICTED: hypothetical protein LOC100000002
isotig09591	34.4	6.6	0.000257031	PREDICTED: EGF-like module-containing mucin-like hormone receptor-like 1-like
isotig04862	32.6	6.6	0.000540498	PREDICTED: interferon-induced very large GTPase 1-like
isotig03458	29.2	6.6	0.00211402	hypothetical protein LOC323976
isotig06546	0	6.6	0.00351856	D4, zinc and double PHD fingers family 2, like
isotig15126	0	6.6	0.0044888	PREDICTED: transmembrane protein 173-like
isotig31874	1.2	6.6	0.0151911	M-phase phosphoprotein 8
isotig16211	1.6	6.6	0.0251129	phosphoinositide 3-kinase regulatory subunit 5
isotig21160	1.6	6.6	0.0251129	PREDICTED: hypothetical protein LOC100003413
isotig03922	22	6.6	0.0304606	Osbpl1a protein
isotig03923	22	6.6	0.0304606	oxysterol-binding protein-related protein 1
isotig20453	1.8	6.6	0.0314818	28S ribosomal protein S25, mitochondrial
isotig23223	1.8	6.6	0.0314818	novel protein similar to vertebrate mitochondrial ribosomal protein S28 (MPRS28)
isotig16859	1.8	6.6	0.0314818	thimet oligopeptidase
isotig04885	21.8	6.6	0.0326307	neutral amino acid transporter B(0)
isotig11987	21.6	6.6	0.0349438	Probable ubiquitin carboxyl-terminal hydrolase CYLD
isotig12223	21.4	6.6	0.0374082	hypothetical protein LOC445149
isotig17462	2	6.6	0.0388875	zinc finger and BTB domain-containing protein 10
isotig27141	21.2	6.6	0.0400326	TSC22 domain family protein 1 isoform 1
isotig20407	2.2	6.6	0.0473968	BCL2/adenovirus E1B 19kDa interacting protein 3b
isotig32175	2.2	6.6	0.0473968	GI13450
isotig10987	2.2	6.6	0.0473968	NADH dehydrogenase
isotig01911	53.4	6.8	7.27426e-08	sciellin
isotig23827	36.4	6.8	0.000138852	PREDICTED: hypothetical protein LOC100005948
isotig04673	35.6	6.8	0.000194009	selenoprotein W, 2b
isotig04674	35.6	6.8	0.000194009	selenoprotein W, 2b
isotig04675	35.6	6.8	0.000194009	selenoprotein W, 2b
isotig04676	35.6	6.8	0.000194009	selenoprotein W, 2b
isotig12699	35	6.8	0.000248924	Kruppel-like factor 2b
isotig03457	29.2	6.8	0.00255307	hypothetical protein LOC323976
isotig23430	0	6.8	0.00450725	Ab1-108
isotig19315	1.2	6.8	0.0130686	novel protein similar to vertebrate crystallin, beta A1 (CRYBA1)
isotig04884	23.4	6.8	0.0217531	neutral amino acid transporter B(0)
isotig21421	2.2	6.8	0.0414117	PREDICTED: hypothetical protein LOC563681
isotig07563	21.4	6.8	0.0430667	THO complex subunit 4
isotig07279	21	6.8	0.0491706	cyclic AMP-dependent transcription factor ATF-1
isotig12932	38	7	8.86409e-05	dual specificity protein phosphatase 1
isotig11639	30.4	7	0.00193284	periostin isoform 2
isotig20080	0	7	0.00263676	C3orf68 homolog
isotig05560	0	7	0.00330453	PREDICTED: p-selectin
isotig18194	0	7	0.00624345	PREDICTED: nucleolar protein 7
isotig12310	26.4	7	0.00872532	Kruppel-like factor 2a
isotig05833	1.4	7	0.014666	novel protein (zgc:110631)
isotig19752	1.4	7	0.014666	novel protein similar to H.sapiens DNAJC19, DnaJ (Hsp40) homolog, subfamily C, member 19 (DNAJC19, zgc:92393)
isotig15746	1.6	7	0.0187998	PREDICTED: protein strawberry notch homolog 1-like, partial
isotig23085	2.2	7	0.0361625	PREDICTED: alpha-protein kinase 1-like
isotig07762	2.4	7	0.0438242	Btbd2 protein
isotig16516	2.4	7	0.0438242	inositol monophosphatase 1
isotig31083	32.8	7.2	0.000914502	PREDICTED: hypothetical protein LOC100536897
isotig05559	0	7.2	0.00283783	PREDICTED: p-selectin
isotig15037	1	7.2	0.0072597	39S ribosomal protein L12, mitochondrial
isotig09750	1.2	7.2	0.00967103	C-C motif chemokine 19-like
isotig22086	1.2	7.2	0.00967103	novel protein
isotig27221	1.4	7.2	0.0126489	PREDICTED: hypothetical protein LOC100330539
isotig27264	1.4	7.2	0.0126489	PREDICTED: hypothetical protein XP_849409
isotig10781	25.4	7.2	0.0146483	immediate early response 2
isotig14667	1.6	7.2	0.01626	leukocyte receptor cluster (LRC) member 1
isotig04497	23.8	7.2	0.0254831	hypoxia-inducible factor-4alpha
isotig04883	23.8	7.2	0.0254831	neutral amino acid transporter B(0)
isotig21494	2.2	7.2	0.0315624	novel protein
isotig13619	2.6	7.2	0.046126	aspartyl aminopeptidase
isotig14927	2.6	7.2	0.046126	deoxycytidylate deaminase
isotig16777	2.6	7.2	0.046126	interferon regulatory factor 1
isotig06655	60.6	7.4	6.12463e-09	serine/threonine-protein kinase SIK1
isotig11797	44.2	7.4	1.00098e-05	Rev-Erb beta 1
contig03459	29.4	7.4	0.00405073	PREDICTED: hypothetical protein LOC100535641
isotig15305	1.4	7.4	0.0109079	PREDICTED: nuclear receptor coactivator 6, partial
isotig04496	26	7.4	0.0138402	hypoxia-inducible factor-4alpha
isotig15083	1.8	7.4	0.0178396	COP9 signalosome complex subunit 5
isotig04495	23.8	7.4	0.0293836	hypoxia-inducible factor-4alpha
isotig16278	2.8	7.4	0.0483189	nipped-B like a
isotig11804	36	7.6	0.000381123	major facilitator superfamily domain-containing protein 2A-B
isotig13555	33.2	7.6	0.00114636	PREDICTED: myosin-9, partial
isotig06881	33.2	7.6	0.00114636	PREDICTED: si:dkey-266m15.6
isotig28525	0	7.6	0.00243807	PREDICTED: hypothetical protein
isotig05558	0	7.6	0.00393347	PREDICTED: p-selectin
isotig06625	0	7.6	0.00393347	uncharacterized protein III
isotig11413	29.2	7.6	0.00516674	PREDICTED: desmocollin-1 isoform 2
isotig14318	1	7.6	0.00535062	ruvB-like 2
isotig14908	1	7.6	0.00535062	spermine oxidase
isotig16490	27.8	7.6	0.00856458	PREDICTED: hypothetical protein LOC100330171 isoform 1
isotig09749	1.4	7.6	0.00940552	C-C motif chemokine 19-like
isotig18689	1.4	7.6	0.00940552	nonspecific cytotoxic cell receptor protein
isotig04494	26	7.6	0.0160986	hypoxia-inducible factor-4alpha
isotig12113	25.8	7.6	0.0172442	Serine peptidase inhibitor, Kunitz type 1 b
isotig10780	25.4	7.6	0.0197684	immediate early response 2
isotig15227	2.2	7.6	0.0240083	hypothetical protein LOC100145415
isotig12590	2.2	7.6	0.0240083	large subunit GTPase 1 homolog
isotig25700	2.2	7.6	0.0240083	PREDICTED: UPF0466 protein C22orf32 homolog, mitochondrial-like
isotig13113	24.4	7.6	0.0276714	collagen type I alpha 2
isotig08202	2.6	7.6	0.0355073	far upstream element-binding protein 2
isotig10409	2.6	7.6	0.0355073	PREDICTED: arf-GAP with dual PH domain-containing protein 2-like
isotig11543	23	7.6	0.0437292	serine/threonine-protein kinase 10
isotig11400	57.8	7.8	3.94669e-08	MAP kinase-interacting serine/threonine kinase 2
isotig31906	49.4	7.8	1.69766e-06	AHNAK nucleoprotein isoform 1
isotig06880	33.4	7.8	0.00127791	PREDICTED: si:dkey-266m15.6
isotig05557	0	7.8	0.00337374	PREDICTED: p-selectin
isotig16320	1.6	7.8	0.0105066	heme oxygenase
isotig07500	2.4	7.8	0.0256625	PREDICTED: hypothetical protein LOC335618
isotig04329	25	7.8	0.0260622	TGN47
isotig12243	2.8	7.8	0.0373676	PREDICTED: leucyl-tRNA synthetase, cytoplasmic, partial
isotig14079	45.2	8	1.32102e-05	Cxcr4A
isotig10486	42.8	8	3.6197e-05	Ahnak protein
isotig10487	42.8	8	3.6197e-05	Ahnak protein
isotig04059	38.6	8	0.00020161	prestin
isotig04060	38.6	8	0.00020161	prestin
isotig03888	33.6	8	0.00142066	PREDICTED: CMP-N-acetylneuraminate-beta-galactosamide-alpha-2,3-sialyltransferase 1
isotig03889	33.6	8	0.00142066	PREDICTED: CMP-N-acetylneuraminate-beta-galactosamide-alpha-2,3-sialyltransferase 1
isotig17184	0	8	0.00289438	PREDICTED: hypothetical protein LOC563420
isotig03456	30.8	8	0.0040229	hypothetical protein LOC323976
isotig17123	1.4	8	0.00699115	PREDICTED: apoptosis regulator BAX-like
isotig04781	1.8	8	0.0116138	hypothetical protein LOC406459
isotig04782	1.8	8	0.0116138	hypothetical protein LOC406459
isotig16438	2	8	0.0146459	PREDICTED: cytospin-A-like
isotig13762	2.2	8	0.01823	Si:dkey-10p5.7
isotig07499	2.4	8	0.0224201	PREDICTED: hypothetical protein LOC335618
isotig14414	3.2	8	0.0462852	cysteine desulfurase, mitochondrial
isotig06654	60.8	8.2	1.74923e-08	serine/threonine-protein kinase SIK1
isotig03455	30.8	8.2	0.00474139	hypothetical protein LOC323976
isotig24692	1.4	8.2	0.00602673	LOC557059 protein
isotig10830	1.6	8.2	0.00784566	tumor necrosis factor receptor superfamily member 9
isotig15724	1.6	8.2	0.00784566	Zgc:152777 protein
isotig15955	2	8.2	0.0127202	NEDD4-binding protein 2
isotig28663	2.6	8.2	0.0238784	forkhead box protein L1
isotig27135	2.6	8.2	0.0238784	PREDICTED: myosin-Ih
isotig24858	3	8.2	0.034473	unnamed protein product
isotig12715	3.4	8.2	0.0480452	host cell factor C1b
isotig17046	3.4	8.2	0.0480452	Zgc:110137
isotig10404	32.6	8.4	0.0029157	sodium bicarbonate cotransporter
isotig11529	30.2	8.4	0.00687433	A-kinase anchor protein 12
isotig01108	28.4	8.4	0.0127837	glucose-6-phosphatase
isotig21581	2.2	8.4	0.0138204	DDB1- and CUL4-associated factor 7
isotig21303	2.2	8.4	0.0138204	THO complex subunit 7-like protein
isotig10956	2.6	8.4	0.0208984	deoxyribonuclease-2-alpha
isotig18512	2.8	8.4	0.0252974	PREDICTED: hypothetical protein LOC563681
isotig18300	3	8.4	0.0303336	eukaryotic translation initiation factor 3 subunit K
isotig15783	3.2	8.4	0.0360536	glycerate kinase
isotig10848	3.4	8.4	0.0425021	pleckstrin homology domain containing, family F (with FYVE domain) member 1
isotig15196	3.6	8.4	0.0497218	insulin-like growth factor binding protein-1
isotig27644	182.4	8.6	2.6278e-34	unnamed protein product
isotig09592	37.6	8.6	0.000535181	PREDICTED: EGF-like module-containing mucin-like hormone receptor-like 1-like
isotig19894	0	8.6	0.00183034	thioredoxin-like 4A
isotig03226	33.6	8.6	0.00239448	PREDICTED: endothelial PAS domain-containing protein 1
isotig26171	31.2	8.6	0.0056555	PREDICTED: EGF-like module-containing mucin-like hormone receptor-like 1-like
isotig13606	1.8	8.6	0.00754393	hypothetical protein LOC393870
isotig15574	1.8	8.6	0.00754393	mitochondrial import inner membrane translocase subunit Tim13
isotig12360	30.2	8.6	0.00801175	G protein-coupled receptor 56
isotig02152	27.8	8.6	0.0180079	PREDICTED: desmoglein-4
isotig18981	3.6	8.6	0.0440684	aurora kinase A-interacting protein
isotig16982	3.6	8.6	0.0440684	integrin, beta 4
isotig08294	127.8	8.8	3.76009e-22	RecName: Full=UPF0472 protein C16orf72 homolog
isotig06686	33.6	8.8	0.00282648	bcl-2-like protein 1
isotig06687	33.6	8.8	0.00282648	bcl-2-like protein 1
isotig14449	1.4	8.8	0.00385954	natterin-like protein
isotig15176	2	8.8	0.0083188	novel protein similar to H.sapiens RRBP1, ribosome binding protein 1 homolog 180kDa (dog) (RRBP1, zgc:171356)
isotig12711	2.2	8.8	0.0104623	nucleoprotein TPR
isotig08059	2.6	8.8	0.0159848	coagulation factor XIII A chain
isotig11673	28.4	8.8	0.0169776	Tissue inhibitor of metalloproteinase 2
contig10241	3	8.8	0.0234449	unnamed protein product
isotig23362	3.2	8.8	0.0280111	PREDICTED: c-C motif chemokine 3-like
isotig14999	3.2	8.8	0.0280111	thymidylate synthase
isotig16932	3.4	8.8	0.0331921	PREDICTED: RING finger protein 31-like, partial
isotig23961	0	9	0.00084662	ATPase subunit 9
isotig11490	31.4	9	0.00716287	ceramide glucosyltransferase
isotig17360	2.4	9	0.0113362	density-regulated protein
isotig13442	2.8	9	0.0170426	PREDICTED: GPI transamidase component PIG-T
isotig11863	3	9	0.0205943	dnaJ homolog subfamily C member 2
isotig12015	27	9	0.0303688	guanine nucleotide binding protein (G protein), alpha 14
isotig10850	3.6	9	0.0345438	proteasome 216S subunit, non-ATPase, 11a
isotig12388	3.8	9	0.0404275	large proline-rich protein BAT3
isotig10934	4	9	0.0469931	proteasome assembly chaperone 2
isotig31320	53.2	9.2	1.78116e-06	MHC class I antigen
isotig15377	0	9.2	0.00116003	ubiquitin specific protease 18
isotig10061	36.8	9.2	0.00123408	NADH dehydrogenase subunit 4
isotig13656	1	9.2	0.00158717	60S ribosomal export protein NMD3
isotig24494	1	9.2	0.00158717	ubiquitin-conjugating enzyme E2 S
isotig03763	1.4	9.2	0.00286694	unnamed protein product
isotig13702	2.4	9.2	0.0098792	complement factor properdin
isotig12996	2.4	9.2	0.0098792	RecName: Full=Hepatoma-derived growth factor-related protein 2; Short=HRP-2
isotig05808	2.6	9.2	0.0122048	arf-GAP with coiled-coil, ANK repeat and PH domain-containing protein 1
isotig14476	2.8	9.2	0.0149255	TRAF-type zinc finger domain-containing protein 1
isotig16193	3	9.2	0.0180808	RecName: Full=E3 ubiquitin-protein ligase RNF181; AltName: Full=RING finger protein 181
isotig06720	28.2	9.2	0.0236715	PREDICTED: ras association domain-containing protein 5-like isoform 1
isotig06721	28	9.2	0.0252147	PREDICTED: ras association domain-containing protein 5-like isoform 2
isotig20074	3.4	9.2	0.0258548	26S proteasome non-ATPase regulatory subunit 9
isotig31944	27.6	9.2	0.0285842	PREDICTED: v-set domain-containing T-cell activation inhibitor 1-like
isotig14077	3.6	9.2	0.030553	retinoblastoma binding protein 9
isotig06623	0	9.4	0.00099692	uncharacterized protein III
isotig06624	0	9.4	0.00099692	uncharacterized protein III
isotig22258	1.4	9.4	0.00247085	Small nuclear ribonucleoprotein Sm D2
isotig05831	2	9.4	0.00542764	ATP-dependent DNA helicase Q1
isotig16188	2.2	9.4	0.00687465	unnamed protein product
isotig18478	3.2	9.4	0.0190975	complement C1q subcomponent subunit B
isotig24186	3.6	9.4	0.027006	Cytochrome c oxidase subunit VIb isoform 1
isotig15821	3.8	9.4	0.0317589	ELG protein
isotig08044	26.8	9.4	0.0413068	Bmper
isotig22576	4.2	9.4	0.0430471	hypothetical protein LOC393689
isotig14255	4.2	9.4	0.0430471	PREDICTED: leukotriene B4 receptor 1-like
isotig05270	71.6	9.6	8.91971e-10	PREDICTED: si:dkey-165a24.4 isoform 2
isotig05271	71.6	9.6	8.91971e-10	PREDICTED: si:dkey-165a24.4 isoform 2
isotig11763	0	9.6	0.000856949	unnamed protein product
isotig14013	1.2	9.6	0.00159072	novel protein similar to vertebrate interferon induced with helicase C domain 1 (IFIH1)
isotig03877	1.4	9.6	0.00212945	peptidase S8/S53 subtilisin kexin sedolisin
isotig05807	3.6	9.6	0.023856	arf-GAP with coiled-coil, ANK repeat and PH domain-containing protein 1
isotig13529	3.6	9.6	0.023856	hypothetical protein LOC541514
isotig12908	3.8	9.6	0.0281207	family with sequence similarity 49, member A
isotig18734	4	9.6	0.0329215	WW domain-containing transcription regulator protein 1
isotig17967	4.2	9.6	0.0382938	zinc finger, matrin-type 2
isotig19355	4.4	9.6	0.0442721	RecName: Full=Proteasome subunit beta type-1-B; AltName: Full=20S proteasome beta-6 subunit B; Short=B6-B
isotig31720	243	9.8	1.33497e-46	cytochrome c oxidase subunit II
isotig03707	37.2	9.8	0.00175815	PREDICTED: SAM domain and HD domain-containing protein 1-like
isotig03876	1.4	9.8	0.0018352	peptidase S8/S53 subtilisin kexin sedolisin
isotig15306	2.8	9.8	0.00999885	glycerophosphodiester phosphodiesterase domain containing 1 like
isotig14885	3	9.8	0.0121995	Zgc:112077
isotig21030	3.2	9.8	0.0147538	PREDICTED: paired box protein Pax-3
isotig12457	28.8	9.8	0.0286949	putative arginase 2C precursor
isotig16369	4.4	9.8	0.0394449	general transcription factor IIE, polypeptide 2, beta
isotig03007	57	10	9.00504e-07	PREDICTED: neuroblast differentiation-associated protein AHNAK
isotig15463	46.8	10	5.74314e-05	PREDICTED: hypothetical protein LOC100005901
isotig23299	0	10	0.00046493	PREDICTED: u1 small nuclear ribonucleoprotein C-like
isotig12673	39.6	10	0.000874518	hypothetical protein LOC768172
isotig21592	1.6	10	0.00209509	keratinocyte-associated protein 2
isotig09515	3.6	10	0.0185827	PREDICTED: differentially expressed in FDCP 6 homolog
isotig10481	30	10	0.0224673	fibronectin
isotig12643	29.8	10	0.0238974	zinc finger C4H2 domain-containing protein
isotig12182	28.2	10	0.0387495	unnamed protein product
isotig04065	27.8	10	0.0435973	glycine N-methyltransferase
isotig04066	27.8	10	0.0435973	glycine N-methyltransferase
isotig06614	4.8	10	0.0465599	ribosomal protein S13
isotig06615	4.8	10	0.0465599	ribosomal protein S13
isotig31222	1.4	10.2	0.00136307	hypothetical protein LOC555357
isotig25753	38.2	10.2	0.00170018	PREDICTED: EGF-like module-containing mucin-like hormone receptor-like 1-like
isotig12362	3.2	10.2	0.0113755	unnamed protein product
isotig14240	4.4	10.2	0.0312459	transcriptional regulator ATRX
isotig12299	5	10.2	0.0476259	novel protein similar to vertebrate breast cancer anti-estrogen resistance 3 (BCAR3)
isotig03370	110.4	10.4	3.48875e-17	nicotinamide nucleotide adenylyltransferase 1
isotig03371	110.2	10.4	3.84315e-17	nicotinamide nucleotide adenylyltransferase 1
contig00671	75.8	10.4	3.99274e-10	PREDICTED: hypothetical protein LOC100007639
isotig24766	0	10.4	0.000253697	PREDICTED: hypothetical protein LOC100536805
isotig18704	1	10.4	0.000641846	PREDICTED: cysteinyl-tRNA synthetase, mitochondrial
isotig22306	40	10.4	0.00105463	PREDICTED: neural cell adhesion molecule 1-like
isotig05189	2	10.4	0.00265272	PREDICTED: hypothetical protein LOC335285
isotig13852	2.8	10.4	0.006674	DNA-(apurinic or apyrimidinic site) lyase
isotig12063	33.2	10.4	0.0106289	aspartate aminotransferase, cytoplasmic
isotig09411	4	10.4	0.0202944	twinfilin, actin-binding protein, homolog 1b
isotig06531	30.6	10.4	0.0239508	novel alpha globin
isotig18913	4.4	10.4	0.0277813	Psma6a protein
isotig24709	45.2	10.6	0.00018631	hypothetical protein LOC641564
contig00656	37.4	10.6	0.00305314	PREDICTED: hypothetical protein LOC100333859
isotig14396	2.4	10.6	0.00373766	methionine-tRNA synthetase
isotig14283	36.4	10.6	0.00427902	PREDICTED: e3 ubiquitin-protein ligase TRIM21-like
isotig15774	2.8	10.6	0.00582833	N-ethylmaleimide-sensitive factor b
isotig18546	3.6	10.6	0.0127229	RWD domain-containing protein 1
isotig13081	4.2	10.6	0.021118	hypothetical protein LOC556313
isotig14683	4.2	10.6	0.021118	PREDICTED: myelin basic protein isoform 1
isotig20919	4.4	10.6	0.0246848	RNA-binding protein 8A
isotig18770	4.6	10.6	0.0286854	proteasome subunit alpha type-6
isotig12961	4.6	10.6	0.0286854	sperm-associated antigen 1
isotig16912	4.8	10.6	0.0331493	PREDICTED: endonuclease G, partial
isotig23985	4.8	10.6	0.0331493	PREDICTED: GTPase IMAP family member 8-like
isotig10964	5	10.6	0.0381059	prefoldin subunit 2
isotig19525	5.4	10.6	0.0496106	PREDICTED: phosphatidylinositol-3,4,5-trisphosphate 5-phosphatase 1-like
isotig05153	31.2	10.6	0.0225568	[Pyruvate dehydrogenase [lipoamide]] kinase isozyme 2, mitochondrial [Danio rerio]
isotig17788	87.4	10.8	3.51626e-12	PREDICTED: hypothetical protein LOC100330250 isoform 1
isotig13574	4.2	10.8	0.0187129	unnamed protein product
isotig29814	4.4	10.8	0.0219196	ribonuclease like 2
isotig19098	4.6	10.8	0.0255254	PREDICTED: u2 small nuclear ribonucleoprotein B&apos;&apos;
isotig31845	31	10.8	0.0270109	PREDICTED: hypothetical protein LOC565101
isotig18985	5	10.8	0.0340484	ATP synthase subunit g, mitochondrial
isotig11699	39	11	0.00238877	connexin 43
isotig18665	4.8	11	0.0263396	complement C1q subcomponent subunit C
isotig06327	4.8	11	0.0263396	translocon-associated protein subunit alpha
isotig06328	4.8	11	0.0263396	translocon-associated protein subunit alpha
isotig07810	5	11	0.0304019	ribonuclease like 3
isotig11282	2	11.2	0.00149155	60S acidic ribosomal protein P2
isotig19485	4.4	11.2	0.0172525	RecName: Full=Immediate early response 3-interacting protein 1
isotig03598	4.8	11.2	0.0234558	PREDICTED: ecto-ADP-ribosyltransferase 5-like
isotig02162	5.2	11.2	0.031215	Sphingosylphosphorylcholine receptor
isotig06329	39.6	11.4	0.0026216	PREDICTED: hypothetical protein LOC100334512
isotig05146	36.2	11.4	0.00795121	PREDICTED: histo-blood group ABO system transferase
isotig20417	35.6	11.4	0.00960692	PERQ amino acid-rich with GYF domain-containing protein 2
isotig21497	34.6	11.4	0.0131053	PREDICTED: protein NLRC3
isotig05601	4.4	11.4	0.0152926	fragile X-related protein
isotig10963	5	11.4	0.0241901	prefoldin subunit 2
isotig06819	6	11.4	0.047037	PREDICTED: CAP-Gly domain-containing linker protein 1
isotig11771	51.8	11.6	3.83544e-05	monoglyceride lipase
isotig11585	44.6	11.6	0.000544439	fos-related antigen 1
isotig11437	42.4	11.6	0.00117515	hypothetical protein LOC436899
isotig12196	5.2	11.6	0.024902	M-phase phosphoprotein 8
isotig00653	6.2	11.6	0.0478027	novel immune type receptor
contig00811	57.2	11.8	5.72269e-06	PREDICTED: hypothetical protein LOC794334
isotig10750	53	11.8	2.92504e-05	PREDICTED: hypothetical protein
isotig10751	51.6	11.8	4.97745e-05	hypothetical protein BRAFLDRAFT_76460
isotig11133	3	11.8	0.00319931	PREDICTED: 39S ribosomal protein L42, mitochondrial-like
isotig04212	3	11.8	0.00319931	ribonuclease like 2
isotig12209	3.4	11.8	0.00484187	growth arrest-specific protein 6
isotig13539	4	11.8	0.00851449	Dyskeratosis congenita 1, dyskerin
isotig13910	4	11.8	0.00851449	myb-binding protein 1A-like protein
isotig13887	4.4	11.8	0.0119956	something about silencing protein 10
isotig13772	4.4	11.8	0.0119956	transportin-3
isotig15552	35.4	11.8	0.0131642	ORF2-encoded protein
isotig02739	34	11.8	0.0200264	ovary-specific C1q-like factor
isotig13907	6.4	11.8	0.048532	Cytohesin 1
isotig04213	3.2	12	0.00345686	ribonuclease like 2
isotig03087	3.6	12	0.00516897	putative homeodomain transcription factor 1
isotig07808	5.2	12	0.0198146	PREDICTED: hypothetical protein LOC795295
isotig07809	5.2	12	0.0198146	PREDICTED: hypothetical protein LOC795295
isotig16112	5.4	12	0.0228639	Abl interactor 1
isotig12726	33.8	12	0.0238422	S-adenosylmethionine synthetase isoform type-2
isotig07282	5.6	12	0.0262588	novel protein
isotig14661	2.4	12.2	0.00121216	C-C chemokine receptor family-like
isotig05524	36.2	12.2	0.0132051	novel protein similar to H.sapiens ITPKC, inositol 1,4,5-trisphosphate 3-kinase C (ITPKC)
isotig12776	36	12.2	0.0140218	collagen type I alpha 3
isotig10777	5.4	12.2	0.0204142	rho-related GTP-binding protein RhoV
contig03685	34.4	12.2	0.0224622	PREDICTED: NACHT, LRR and PYD domains-containing protein 12
isotig03216	34.2	12.2	0.023798	PREDICTED: ephrin type-B receptor 3-like, partial
isotig03217	34.2	12.2	0.023798	PREDICTED: ephrin type-B receptor 3-like, partial
isotig08386	6.6	12.2	0.044429	PREDICTED: hypothetical protein LOC100001066
isotig18009	6.6	12.2	0.044429	pre-mRNA branch site protein p14
isotig07508	2.4	12.4	0.00105206	PREDICTED: uncharacterized protein C6orf150-like
isotig32069	44.4	12.4	0.00108846	PREDICTED: NACHT, LRR and PYD domains-containing protein 3-like, partial
isotig04210	2.8	12.4	0.00169773	ribonuclease like 2
isotig03086	3.6	12.4	0.00398102	putative homeodomain transcription factor 1
isotig05096	5	12.4	0.0135135	TATA-binding protein-associated factor 2N
isotig09410	5.6	12.4	0.0209971	twinfilin, actin-binding protein, homolog 1b
isotig03084	5.8	12.4	0.024094	putative homeodomain transcription factor 1
isotig06977	6.2	12.4	0.0313209	lipase maturation factor 2
isotig09112	49.8	12.6	0.0001937	Guanine nucleotide-binding protein GI/GS/GO gamma-5 subunit precursor
isotig10493	1.8	12.6	0.0004111	PREDICTED: RING finger protein 213-like
isotig04211	3	12.6	0.00185549	ribonuclease like 2
isotig03032	39.6	12.6	0.00598778	hypothetical protein
isotig03033	39.6	12.6	0.00598778	hypothetical protein
isotig03034	39.6	12.6	0.00598778	hypothetical protein
isotig03035	39.6	12.6	0.00598778	hypothetical protein
isotig12567	38	12.6	0.00979685	CCAAT/enhancer-binding protein alpha
isotig13774	5	12.6	0.0120073	novel protein (zgc:112282)
isotig06976	6.2	12.6	0.0281304	lipase maturation factor 2
isotig13235	6.6	12.6	0.0361133	interferon regulatory factor 8
isotig11900	54.8	12.8	3.70424e-05	collagen alpha-1(X) chain
isotig23698	1.8	12.8	0.000355144	PREDICTED: hypothetical protein LOC335285
isotig16268	3.2	12.8	0.00201728	PREDICTED: hypothetical protein
isotig15133	4	12.8	0.00451265	proteasome 26S subunit, non-ATPase, 13
isotig15915	4.6	12.8	0.00769217	Nudc protein
isotig18191	4.6	12.8	0.00769217	PREDICTED: tyrosine-protein phosphatase non-receptor type 3
isotig07728	4.6	12.8	0.00769217	unnamed protein product
isotig12948	38.8	12.8	0.008697	PREDICTED: collagen alpha-1(X) chain
isotig03082	5.8	12.8	0.0192866	putative homeodomain transcription factor 1
isotig07858	6.6	12.8	0.0325245	PREDICTED: basement membrane-specific heparan sulfate proteoglycan core protein-like
isotig10489	6.6	12.8	0.0325245	serine/threonine-protein phosphatase 5
isotig11606	56	13	2.83327e-05	arrestin domain containing 3b
isotig20999	1.2	13	0.000125474	PREDICTED: hypothetical protein LOC567924
isotig19494	1.4	13	0.000170452	SI:dZ87I4.1 (novel protein similar to human signal transducer and activator of transcription (STAT1))
isotig05187	2	13	0.000405511	PREDICTED: hypothetical protein LOC335285
isotig07756	3	13	0.00141072	PREDICTED: RING finger protein 213
isotig15794	3.8	13	0.00327497	enoyl-CoA hydratase, mitochondrial
isotig06022	40.4	13	0.00604097	eukaryotic translation initiation factor 4E-binding protein 2
isotig06023	40.4	13	0.00604097	eukaryotic translation initiation factor 4E-binding protein 2
isotig13125	5.4	13	0.0128959	TRIF/TICAM1
isotig12588	1.4	13.2	0.00014698	PREDICTED: UMP-CMP kinase 2, mitochondrial, partial
isotig03111	2.4	13.2	0.000596019	PREDICTED: laminin subunit beta-3
isotig14237	5.2	13.2	0.00984256	dihydrolipoyllysine-residue succinyltransferase component of 2-oxoglutarate dehydrogenase complex, mitochondrial
isotig09064	5.2	13.2	0.00984256	novel protein
isotig19094	6	13.2	0.017719	protein QIL1
isotig10540	7	13.2	0.0336375	ATP-binding cassette sub-family E member 1 isoform 1
isotig21847	7.2	13.2	0.0378209	PREDICTED: ecto-ADP-ribosyltransferase 5
isotig16989	7.2	13.2	0.0378209	PREDICTED: uncharacterized protein C7orf50 homolog
isotig13268	7.6	13.2	0.0473402	Nsfl1c protein
isotig12767	2.6	13.4	0.000665076	immunoresponsive gene 1, like
isotig03107	2.8	13.4	0.000847896	PREDICTED: laminin subunit beta-3
isotig03108	2.8	13.4	0.000847896	PREDICTED: laminin subunit beta-3
isotig03109	2.8	13.4	0.000847896	PREDICTED: laminin subunit beta-3
isotig03110	2.8	13.4	0.000847896	PREDICTED: laminin subunit beta-3
isotig03085	5	13.4	0.00744491	putative homeodomain transcription factor 1
isotig03028	39.6	13.4	0.00985851	hypothetical protein
isotig03029	39.6	13.4	0.00985851	hypothetical protein
isotig03030	39.6	13.4	0.00985851	hypothetical protein
isotig03031	39.6	13.4	0.00985851	hypothetical protein
isotig05522	37.8	13.4	0.0166745	novel protein similar to H.sapiens ITPKC, inositol 1,4,5-trisphosphate 3-kinase C (ITPKC)
isotig02222	6.4	13.4	0.0207857	leukocyte immune-type receptor TS32.15 L1.2a2
isotig21016	7	13.4	0.0303336	PREDICTED: signal-induced proliferation-associated 1 like 3
isotig02201	320.6	13.6	2.5744e-60	cytochrome oxidase subunit 1
isotig04402	3.4	13.6	0.00145906	angiogenin-3
isotig10981	5.2	13.6	0.00776141	PREDICTED: wiskott-Aldrich syndrome protein
isotig10982	5.2	13.6	0.00776141	PREDICTED: wiskott-Aldrich syndrome protein
isotig07729	5.4	13.6	0.00908427	PREDICTED: b-cell receptor CD22-like
isotig07359	5.6	13.6	0.0105818	dihydrolipoamide dehydrogenase
isotig18163	6	13.6	0.0141641	proteasome subunit alpha type-1
isotig06775	6.2	13.6	0.0162819	nucleolar and coiled-body phosphoprotein 1-like
isotig06774	6.2	13.6	0.0162819	nucleolar and coiled-body phosphoprotein 1-like
isotig06710	7.2	13.6	0.0308348	Gnl3 protein
isotig06711	7.2	13.6	0.0308348	Gnl3 protein
isotig10776	7.4	13.6	0.0346639	rho-related GTP-binding protein RhoV
isotig21397	1.4	13.8	9.42717e-05	PREDICTED: uncharacterized protein C20orf117
isotig16454	1.8	13.8	0.000170801	PREDICTED: hypothetical protein LOC100333266 isoform 1
isotig05188	2.2	13.8	0.00029832	PREDICTED: hypothetical protein LOC335285
isotig03762	2.6	13.8	0.000501503	unnamed protein product
isotig03761	2.8	13.8	0.000641347	unnamed protein product
isotig10696	3.6	13.8	0.00157833	zinc finger protein ZPR1
isotig10697	3.6	13.8	0.00157833	zinc finger protein ZPR1
isotig11339	3.8	13.8	0.00193972	PREDICTED: nuclear receptor coactivator 7-like
isotig03083	5	13.8	0.00584487	putative homeodomain transcription factor 1
isotig12365	5.8	13.8	0.0109424	AP-1 complex subunit beta-1
isotig31879	40	13.8	0.0111003	PREDICTED: hypothetical protein LOC565101
isotig16496	4.4	14	0.00304737	mannose-1-phosphate guanyltransferase beta
isotig13023	5	14	0.00517522	pleckstrin
isotig14193	6.8	14	0.0195121	succinate-CoA ligase, GDP-forming, alpha subunit
isotig05534	8.2	14	0.0442958	Zgc:101757 protein
isotig03760	3.4	14.2	0.000972885	unnamed protein product
isotig12239	5	14.2	0.00458022	PREDICTED: EH domain-containing protein 4
isotig12525	5.2	14.2	0.0054149	nuclear transport factor 2
isotig14996	5.6	14.2	0.00745671	26S proteasome non-ATPase regulatory subunit 6
isotig15843	7.2	14.2	0.0225866	C-X-C motif chemokine 10 precursor
isotig09128	7.2	14.2	0.0225866	lysozyme g-like 1
isotig22904	7.2	14.2	0.0225866	PREDICTED: hypothetical protein LOC100330250 isoform 1
isotig06705	8.6	14.2	0.0495926	PREDICTED: ubiquitin carboxyl-terminal hydrolase 4 isoform 1
isotig04403	3.4	14.4	0.000849497	ribonuclease like 2
isotig20202	41.6	14.4	0.00987361	novel protein
isotig14543	6.4	14.4	0.0119853	hypothetical protein LOC450032
isotig08410	6.8	14.4	0.015727	lysozyme g-like 1
isotig03127	6.8	14.4	0.015727	PREDICTED: paired box protein Pax-3
isotig03128	6.8	14.4	0.015727	PREDICTED: paired box protein Pax-3
isotig03129	6.8	14.4	0.015727	PREDICTED: paired box protein Pax-3
isotig03152	7.2	14.4	0.0203348	PREDICTED: apoptosis-associated speck-like protein containing a CARD-like isoform 1
isotig03153	7.2	14.4	0.0203348	PREDICTED: apoptosis-associated speck-like protein containing a CARD-like isoform 1
isotig14185	8	14.4	0.0326535	PREDICTED: solute carrier family 45 member 4
isotig10593	1.8	14.6	9.50653e-05	RNA helicase LGP2
isotig04404	3.4	14.6	0.000741572	ribonuclease like 2
isotig16785	6.6	14.6	0.0123194	forkhead box I3a
isotig14176	8.4	14.6	0.0368791	calpain 5
isotig12012	8.8	14.6	0.0454979	pre-mRNA-processing factor 40 homolog A
isotig14694	1.2	14.8	3.30947e-05	unnamed protein product
isotig28825	41.4	14.8	0.0131117	PREDICTED: protein NLRC3-like
isotig09129	7.2	14.8	0.0164522	lysozyme g-like 1
isotig19244	7.6	14.8	0.0211092	novel protein similar to vertebrate F-box and leucine-rich repeat protein family
isotig05076	7.4	15	0.0168008	PREDICTED: NACHT, LRR and PYD domains-containing protein 1-like
isotig15275	5.8	15.2	0.00483956	reverse transcriptase
isotig02255	7.4	15.2	0.0151124	LOC557059 protein
isotig14671	8.4	15.2	0.0274827	PREDICTED: olfactomedin-4-like
isotig11610	54	15.4	0.000398024	Butyrate response factor 2
isotig07141	4.4	15.4	0.00124212	PREDICTED: hypothetical protein LOC335392
isotig15606	4.6	15.4	0.00150712	ribonuclease like 2
isotig12166	49.4	15.4	0.00174469	collagen type I alpha 1
isotig14944	4.8	15.4	0.00181824	Golgin subfamily A member 7
isotig07006	46.2	15.4	0.0046205	GATA-binding protein 2a
isotig02735	43.2	15.4	0.0110067	ovary-specific C1q-like factor
isotig02736	43.2	15.4	0.0110067	ovary-specific C1q-like factor
isotig06026	7.4	15.4	0.0135858	G protein-coupled receptor 108, isoform CRA_e
isotig03148	7.4	15.4	0.0135858	PREDICTED: apoptosis-associated speck-like protein containing a CARD-like isoform 1
isotig03149	7.4	15.4	0.0135858	PREDICTED: apoptosis-associated speck-like protein containing a CARD-like isoform 1
isotig03150	7.4	15.4	0.0135858	PREDICTED: apoptosis-associated speck-like protein containing a CARD-like isoform 1
isotig03151	7.4	15.4	0.0135858	PREDICTED: apoptosis-associated speck-like protein containing a CARD-like isoform 1
isotig06027	7.4	15.4	0.0135858	protein GPR108
isotig22154	2.8	15.6	0.00018103	hypothetical protein LOC100093704
isotig07811	4.6	15.6	0.00132598	ribonuclease like 2
isotig19860	5	15.6	0.00192528	PREDICTED: hypothetical protein LOC100537147
isotig12953	5.4	15.6	0.00273727	PREDICTED: inosine-uridine preferring nucleoside hydrolase isoform 1
isotig16953	7.6	15.6	0.0138845	novel protein similar to vertebrate solute carrier family 9 (sodium/hydrogen exchanger)
isotig07691	9.8	15.6	0.0471114	C1GALT1-specific chaperone 1
isotig13690	3.8	15.8	0.000512457	PREDICTED: semaphorin-4B-like
isotig20805	5	15.8	0.00169842	probable global transcription activator SNF2L2 isoform 1
contig07986	45.6	15.8	0.00696536	PREDICTED: hypothetical protein LOC100333859
isotig10488	9	15.8	0.0285002	serine/threonine-protein phosphatase 5
isotig07179	9.2	15.8	0.031708	Ubiquinol-cytochrome c reductase core protein II
isotig07180	9.2	15.8	0.031708	Ubiquinol-cytochrome c reductase core protein II
isotig14114	2.4	16	8.03093e-05	activator of 90 kDa heat shock protein ATPase homolog 1
isotig11734	59.8	16	8.84167e-05	ATPase, Ca++ transporting, cardiac muscle, slow twitch 2b
isotig07449	5	16	0.00149776	Unknown (protein for IMAGE:6523990)
isotig10561	6	16	0.00353494	PREDICTED: similar to KIAA1618 protein
isotig14837	7.4	16	0.00983776	Samsn1a protein
isotig07537	9	16	0.0258639	chloride intracellular channel protein 2
isotig07538	9	16	0.0258639	chloride intracellular channel protein 2
isotig06198	9.2	16	0.0288135	CD40 antigen
isotig06199	9.2	16	0.0288135	CD40 antigen
isotig19277	79.6	16.2	7.0011e-08	Serine protease 27 precursor
isotig04399	4.6	16.2	0.000901251	angiogenin-3
isotig09365	4.6	16.2	0.000901251	interleukin 8
isotig14492	8	16.2	0.0130259	eukaryotic translation initiation factor 4E class I third member
isotig03347	9	16.2	0.023457	PREDICTED: obscurin
isotig03346	9	16.2	0.023457	PREDICTED: obscurin
contig03930	10.4	16.2	0.047872	Polyserase-2
isotig05044	0	16.4	4.22415e-06	hypothetical protein LOC724056
isotig05045	0	16.4	4.22415e-06	hypothetical protein LOC724056
isotig13694	1.4	16.4	1.38608e-05	N-acetylneuraminate lyase
isotig24919	5	16.4	0.00116352	PREDICTED: wu:fa92h10
isotig06824	5.4	16.4	0.00167397	PREDICTED: probable E3 ubiquitin-protein ligase HERC4
isotig06825	5.4	16.4	0.00167397	PREDICTED: probable E3 ubiquitin-protein ligase HERC4
isotig12186	6.8	16.4	0.00517613	dipeptidyl peptidase 3
isotig04965	8.2	16.4	0.0132865	xaa-Pro dipeptidase
isotig09199	8.4	16.4	0.0150079	malignant T cell-amplified sequence 1
isotig08385	9	16.4	0.0212611	PREDICTED: hypothetical protein LOC100001066
isotig23608	9	16.4	0.0212611	PREDICTED: interferon-induced very large GTPase 1
isotig10939	9.6	16.4	0.0294031	hypothetical protein LOC100135343
isotig10940	9.6	16.4	0.0294031	hypothetical protein LOC100135343
isotig10600	10.6	16.4	0.0480943	Hsp47 protein
isotig02238	1.2	16.6	8.80959e-06	predicted protein
isotig02239	1.2	16.6	8.80959e-06	predicted protein
isotig05682	60.6	16.6	0.000106422	novel protein similar to vertebrate regulator of G-protein signalling family
isotig05683	60.6	16.6	0.000106422	novel protein similar to vertebrate regulator of G-protein signalling family
isotig10447	58.4	16.6	0.000221703	meprin A subunit beta
isotig09364	4.8	16.6	0.000846705	interleukin 8
isotig11079	7.6	16.6	0.00812136	ATP synthase, H+ transporting, mitochondrial F0 complex, subunit b, isoform 1
isotig06524	46.6	16.6	0.00822021	novel protein
isotig20071	9.8	16.6	0.0296799	60S ribosomal protein L23a
isotig02219	9.8	16.6	0.0296799	leukocyte immune-type receptor TS32.15 L1.1a
isotig16049	10.8	16.6	0.0483018	proteasome subunit alpha type-7-like
isotig16321	5.8	16.8	0.0018535	novel protein
isotig06797	48	16.8	0.00619342	hypothetical protein LOC572528
isotig06525	47	16.8	0.00820431	PREDICTED: protein NLRC3
isotig11937	9.6	16.8	0.0243013	novel prtoein similar to vertebrate threonyl-tRNA synthetase (TARS, zgc:92586)
isotig11398	70.4	17	4.75274e-06	PREDICTED: envoplakin, partial
isotig31317	67.6	17	1.29465e-05	hypothetical protein LOC554458
isotig14460	3.2	17	0.000111871	PREDICTED: probable E3 ubiquitin-protein ligase HERC4
isotig12624	4.2	17	0.00035379	ubiquitin carboxyl-terminal hydrolase 5
isotig04400	4.6	17	0.000536274	ribonuclease like 2
isotig17631	4.6	17	0.000536274	ribonuclease like 2
isotig14890	9	17	0.0157758	26S protease regulatory subunit 6A
isotig07724	11.2	17	0.0486745	PREDICTED: olfactomedin-like
isotig03693	84.8	17.2	2.48047e-08	osmotic stress transcription factor 1
isotig04401	4.6	17.2	0.000470661	ribonuclease like 2
isotig12615	5.8	17.2	0.00145226	PREDICTED: interferon-induced protein 44-like
isotig05787	53	17.2	0.00181996	MHC TLAI alpha-1 gene
isotig05788	52.8	17.2	0.00193246	MHC TLAI alpha-1 gene
isotig13568	6.8	17.2	0.00327311	poly(U)-binding-splicing factor PUF60-B
isotig06109	8	17.2	0.00766317	transcription initiation factor tfIId subunit 12
isotig06110	8	17.2	0.00766317	transcription initiation factor tfIId subunit 12
isotig13035	9	17.2	0.0142659	Hypothetical LOC559844
isotig13518	11.4	17.2	0.0488405	eukaryotic translation initiation factor 2
isotig17000	11.4	17.2	0.0488405	Nme2 protein
isotig11787	4.6	17.4	0.000412963	PREDICTED: hypothetical protein LOC565454
contig05019	56.2	17.4	0.000777474	hypothetical protein LOC553349
isotig11085	6	17.4	0.0015264	adenylate kinase isoenzyme 1
isotig03694	83.6	17.6	5.8728e-08	TSC22 domain family protein 3
isotig10446	62.4	17.6	0.0001222	unnamed protein product
isotig16362	9.2	17.6	0.0131099	translocon-associated protein subunit beta
isotig31924	67.6	17.8	2.4579e-05	PREDICTED: NACHT, LRR and PYD domains-containing protein 3-like
isotig11355	63.6	17.8	9.5037e-05	PREDICTED: protein NLRC3-like
isotig14095	58.2	17.8	0.000542274	Kruppel-like factor 4
isotig07018	7.4	17.8	0.00363385	hypothetical protein LOC541512
isotig07019	7.4	17.8	0.00363385	hypothetical protein LOC541512
isotig23845	50.4	17.8	0.00550113	novel protein
isotig17909	10.8	17.8	0.0282016	proteasome subunit alpha type-4
isotig11996	5.4	18	0.000615313	DEAD (Asp-Glu-Ala-Asp) box polypeptide 18
isotig11078	7.6	18	0.0037527	ATP synthase, H+ transporting, mitochondrial F0 complex, subunit b, isoform 1
isotig13915	8.2	18	0.00568744	novel protein (zgc:56709)
isotig06015	12.2	18	0.0493799	brain glycogen phosphorylase Pygb
contig03453	59.2	18.2	0.000516754	PREDICTED: hypothetical protein LOC557772
isotig01665	7.4	18.2	0.00289749	PREDICTED: poly
isotig30381	10.6	18.2	0.0211689	PREDICTED: hypothetical protein LOC100006926
isotig06014	12.2	18.2	0.0453818	brain glycogen phosphorylase Pygb
isotig28547	7	18.4	0.00190389	novel immune type receptor
isotig12871	7.6	18.4	0.00299737	rRNA 2&apos;-O-methyltransferase fibrillarin
isotig01661	8.4	18.4	0.00523837	PREDICTED: poly
isotig01662	8.4	18.4	0.00523837	PREDICTED: poly
isotig22112	9.8	18.4	0.0124342	PREDICTED: legumain-like
isotig11296	12	18.4	0.0381121	unknown
isotig11297	12	18.4	0.0381121	unknown
isotig31916	0	18.6	9.82808e-07	unnamed protein product
isotig07748	5	18.6	0.000283661	PREDICTED: sb:cb1081
isotig13253	8	18.6	0.00357061	nucleosome assembly protein 1-like 4a
isotig03461	10.6	18.6	0.0175246	novel protein with a AIG1 family domain (zgc:152658)
isotig05215	11	18.6	0.0215683	PREDICTED: hypothetical protein LOC795321 isoform 1
isotig12851	11.2	18.6	0.0238505	hypothetical protein LOC404610
isotig15534	12.4	18.6	0.0418106	tax1-binding protein 3
isotig17792	12.6	18.6	0.0456091	PREDICTED: hypothetical protein LOC564033
isotig15512	5.4	18.8	0.000370194	protein canopy-1 precursor
isotig26544	59.2	18.8	0.000760399	PREDICTED: protein NLRC3
isotig20452	8	18.8	0.00319566	Glrx protein
isotig17100	12.8	18.8	0.0457075	coatomer subunit epsilon
isotig04341	82.8	19	2.93053e-07	PREDICTED: hypothetical protein LOC100005016
isotig03236	10.8	19	0.0161135	PREDICTED: poly
isotig03237	11.4	19	0.0219388	PREDICTED: poly
isotig05043	0	19.2	6.2785e-07	hypothetical protein LOC724056
isotig04964	10.6	19.2	0.0131454	xaa-Pro dipeptidase
isotig30912	6	19.4	0.000445713	RecName: Full=Carbonic anhydrase 1; AltName: Full=Carbonate dehydratase I; AltName: Full=Carbonic anhydrase I; Short=CA-I
isotig12448	11.6	19.4	0.0201834	PREDICTED: ETS-related transcription factor Elf-3
isotig10426	70.6	19.6	3.48954e-05	PREDICTED: NACHT, LRR and PYD domains-containing protein 3-like, partial
isotig05786	63.8	19.6	0.000310116	MHC TLAI alpha-1 gene
isotig11832	7.2	19.6	0.00110455	PREDICTED: peroxisomal proliferator-activated receptor A-interacting complex 285 kDa protein-like
isotig04859	55	19.6	0.00410591	prolactin receptor
isotig04860	55	19.6	0.00410591	prolactin receptor
isotig10800	10.2	19.6	0.00861601	RecName: Full=Proliferating cell nuclear antigen; Short=PCNA
isotig10801	10.2	19.6	0.00861601	RecName: Full=Proliferating cell nuclear antigen; Short=PCNA
contig00089	11	19.6	0.0134729	Cttn protein
isotig02431	7.6	19.8	0.00134708	PREDICTED: e3 ubiquitin/ISG15 ligase TRIM25-like
isotig13140	12	19.8	0.0205056	atlastin-3
isotig03234	11	20	0.0111196	PREDICTED: poly
isotig03235	11.6	20	0.0152957	PREDICTED: poly
isotig12947	11.6	20	0.0152957	T-complex protein 1 subunit zeta
isotig14546	13	20	0.030032	26S proteasome non-ATPase regulatory subunit 7
isotig15392	8.6	20.2	0.00224935	eukaryotic translation initiation factor 2, subunit 1 alpha
isotig11375	68.2	20.4	0.000133329	PREDICTED: NACHT, LRR and PYD domains-containing protein 3-like, partial
isotig06576	66.2	20.4	0.000248832	PREDICTED: collagen alpha-2(IV) chain
isotig31306	69	20.6	0.000118568	PREDICTED: NACHT, LRR and PYD domains-containing protein 3-like, partial
isotig12868	9.2	20.6	0.00273505	transcription activator BRG1
isotig02402	4.4	20.8	3.43002e-05	PREDICTED: hypothetical protein LOC100331491
isotig11371	71	20.8	7.20248e-05	PREDICTED: NACHT, LRR and PYD domains-containing protein 3-like, partial
isotig07010	67	20.8	0.00025207	PREDICTED: solute carrier family 23 member 2
isotig11537	7.2	20.8	0.00054167	complement B/C2-A2
isotig11256	8.4	20.8	0.00139246	cytochrome c oxidase subunit VIa polypeptide 1
isotig08341	10	20.8	0.00414045	PREDICTED: prostate stem cell antigen-like
isotig15058	12.8	20.8	0.0192871	protein TFG
isotig08593	2	21	1.19764e-06	novel protein containing a TLD domain
isotig08594	2	21	1.19764e-06	novel protein containing a TLD domain
isotig16478	8.4	21	0.00124358	eukaryotic translation initiation factor 4E-1A
isotig02401	4.4	21.2	2.61341e-05	PREDICTED: hypothetical protein LOC100331491
isotig02403	4.4	21.2	2.61341e-05	PREDICTED: hypothetical protein LOC100331491
isotig10592	5.8	21.2	0.000117839	RNA helicase LGP2
isotig15153	13.4	21.2	0.0214497	26S protease regulatory subunit 8
isotig02240	0	21.4	3.04585e-07	glutamyl-tRNA(Gln) amidotransferase subunit B, putative
isotig02405	4.2	21.4	1.79907e-05	PREDICTED: hypothetical protein LOC100331491
isotig18914	6.8	21.4	0.000266209	oligosaccharyltransferase complex subunit ostc
isotig11838	9.2	21.4	0.00177012	protein asteroid homolog 1
isotig15688	14.6	21.4	0.0334403	Sorcin
isotig02254	7.6	21.6	0.000468816	prolyl 4-hydroxylase alpha II-like
isotig05254	10.2	21.6	0.00309641	PREDICTED: hypothetical protein LOC100006784
isotig17054	11	21.6	0.00505769	PREDICTED: NAD(P)(+)--arginine ADP-ribosyltransferase 2-like
isotig06246	11.8	21.6	0.00797121	PREDICTED: hypothetical protein LOC100332522
isotig06247	11.8	21.6	0.00797121	PREDICTED: hypothetical protein LOC100332522
isotig14593	12.8	21.6	0.0134484	PREDICTED: prostaglandin E synthase 3-like
isotig04561	14.8	21.6	0.0335017	PREDICTED: e3 SUMO-protein ligase RanBP2
isotig04562	14.8	21.6	0.0335017	PREDICTED: e3 SUMO-protein ligase RanBP2
isotig02404	4.2	21.8	1.36665e-05	PREDICTED: hypothetical protein LOC100331491
isotig02406	4.2	21.8	1.36665e-05	PREDICTED: hypothetical protein LOC100331491
isotig04639	6.2	21.8	0.000118796	PREDICTED: ecto-ADP-ribosyltransferase 5-like
isotig04640	6.2	21.8	0.000118796	PREDICTED: ecto-ADP-ribosyltransferase 5-like
isotig30559	7.4	21.8	0.000351863	matrix metalloproteinase 9
isotig11620	9	21.8	0.00123139	transglutaminase
isotig03463	10.6	21.8	0.00358787	novel protein with a AIG1 family domain (zgc:152658)
isotig12930	13	21.8	0.0135632	Hn1l protein
isotig19509	14	21.8	0.0217739	proteasome beta 11 subunit
isotig02231	1.2	22	1.75879e-07	PREDICTED: legumain-like
isotig31018	74	22	6.30943e-05	PREDICTED: NACHT, LRR and PYD domains-containing protein 3-like, partial
isotig32173	71.2	22	0.000150777	PREDICTED: protein NLRC3-like
isotig11281	7.8	22	0.000435965	60S acidic ribosomal protein P2
isotig04455	67.2	22	0.000501099	thyrotroph embryonic factor beta
isotig04457	67.2	22	0.000501099	thyrotroph embryonic factor beta
isotig15617	8.8	22	0.000950872	cathepsin L.1
isotig02535	0	22.2	1.93254e-07	novel protein (zgc:153654)
isotig06201	9	22.2	0.000984587	novel protein
isotig00650	11.6	22.2	0.00531964	novel immune type receptor
isotig14937	15	22.4	0.0262442	annexin A4
isotig02534	0	22.6	1.54144e-07	novel protein (zgc:153654)
isotig04981	8	22.6	0.000360167	PREDICTED: hypothetical protein LOC557223
isotig04454	68	22.6	0.000567147	thyrotrophic embryonic factor
isotig04456	68	22.6	0.000567147	thyrotrophic embryonic factor
isotig06200	9	22.6	0.000786095	novel protein
isotig17113	12.2	22.6	0.00613432	proteasome subunit alpha type-5
isotig30759	5.6	22.8	3.39679e-05	interferon-induced GTP-binding protein MxA
isotig15563	11.6	22.8	0.00394891	thioredoxin-like 1
isotig10525	11.8	22.8	0.00443732	ubiquitin fusion degradation protein 1 homolog
isotig10524	12.4	22.8	0.00621913	ubiquitin fusion degradation protein 1 homolog
isotig10631	11.8	23	0.00401821	chorion-specific transcription factor GCMb
isotig18444	12.6	23	0.00630226	PREDICTED: cytochrome c oxidase subunit 5B, mitochondrial-like
isotig11956	13.6	23	0.0105992	PREDICTED: spectrin, beta, non-erythrocytic 1
isotig04500	14.8	23	0.0186884	PREDICTED: asparaginyl-tRNA synthetase, cytoplasmic
isotig04501	14.8	23	0.0186884	PREDICTED: asparaginyl-tRNA synthetase, cytoplasmic
isotig04979	9	23.2	0.000559308	T-cell immune regulator 1
isotig11084	11.4	23.2	0.00286306	adenylate kinase isoenzyme 1
isotig18722	11.6	23.2	0.00323039	NEDD4-like E3 ubiquitin-protein ligase WWP2
isotig14465	12.6	23.2	0.00572674	PREDICTED: similar to proteasome (prosome, macropain) 26S subunit, ATPase 2
isotig16041	13.6	23.2	0.00967719	PREDICTED: serine/threonine-protein kinase Nek1
contig03936	14.8	23.2	0.0171574	PREDICTED: hypothetical protein LOC100149475
isotig05740	2	23.4	2.09529e-07	CD4-like protein
isotig12426	5.2	23.4	1.47668e-05	PKZ
isotig05563	5.6	23.4	2.28899e-05	PREDICTED: hypothetical protein LOC335285
isotig05564	5.6	23.4	2.28899e-05	PREDICTED: hypothetical protein LOC335285
contig05001	67.6	23.4	0.00100479	Zgc:152778 protein
isotig11209	15.4	23.4	0.0205774	protein transport protein Sec61 subunit beta
isotig12589	15.8	23.4	0.0244173	Chaperonin containing TCP1, subunit 7 (eta)
isotig14665	13.4	23.6	0.00726555	cytochrome b245 alpha polypeptide
isotig31523	15.8	23.6	0.0224944	novel protein similar to vertebrate tripartite motif-containing family
isotig21240	3.4	23.8	1.20111e-06	PREDICTED: calcium-dependent secretion activator 1
isotig18855	10.4	23.8	0.001097	mesencephalic astrocyte-derived neurotrophic factor
isotig05253	11	23.8	0.00163339	PREDICTED: hypothetical protein LOC100329912
isotig14177	15.8	23.8	0.0207123	proteasome 26S subunit, ATPase, 4
isotig07925	13	24	0.00485756	DnaJ subfamily A member 2
isotig15338	14.6	24	0.0110296	RecName: Full=Programmed cell death protein 10-A
isotig11893	11.6	24.2	0.00194097	Abcf2 protein
isotig03462	12.4	24.2	0.00314062	novel protein with a AIG1 family domain (zgc:152658)
isotig29394	13	24.2	0.0044125	novel immune type receptor
isotig27633	14.4	24.2	0.00915478	PREDICTED: hypothetical protein LOC100332459
isotig12946	69.2	24.4	0.00111783	PREDICTED: IgGFc-binding protein-like
isotig13087	14.4	24.4	0.00836541	Pgk1 protein
isotig11255	8.6	24.6	0.000180775	cytochrome c oxidase subunit VIa polypeptide 1
isotig07296	10.4	24.6	0.000710204	Serine carboxypeptidase 1
isotig07295	10.6	24.6	0.000816084	Serine carboxypeptidase 1
isotig08933	12.2	24.6	0.00228476	proteasome subunit beta type-3
isotig18440	15.8	24.6	0.0148143	hypothetical protein LOC792613
isotig17069	16.6	24.6	0.0209378	deoxyribonuclease gamma-like
isotig05739	2.4	25	1.20232e-07	CD4-like protein
isotig07533	4	25	1.14892e-06	PREDICTED: GTPase IMAP family member 4-like, partial
isotig03595	11.8	25	0.00145596	PREDICTED: ecto-ADP-ribosyltransferase 5-like
isotig14969	14.2	25	0.00574416	PREDICTED: ecto-ADP-ribosyltransferase 5-like
isotig09914	15	25	0.00857743	protein NEDD1
isotig03594	12.4	25.2	0.00190363	PREDICTED: ecto-ADP-ribosyltransferase 5-like
isotig07804	16.4	25.2	0.0150042	VSI10_DANRE RecName: Full=V-set and immunoglobulin domain-containing protein 10; Flags: Precursor
isotig16919	10.8	25.4	0.000606845	Proteasome subunit alpha type 3
isotig03597	11.8	25.4	0.0011828	PREDICTED: ecto-ADP-ribosyltransferase 5-like
isotig00724	84	25.6	3.05929e-05	PREDICTED: probable G-protein coupled receptor 116-like, partial
isotig02247	9.6	25.6	0.000224545	prolyl 4-hydroxylase alpha II-like
isotig13308	11	25.6	0.000625236	interferon regulatory factor 2
isotig03596	12.4	25.6	0.00155382	PREDICTED: ecto-ADP-ribosyltransferase 5-like
isotig06677	103.2	25.8	6.28134e-08	solute carrier family 12 (sodium/potassium/chloride transporters), member 10.2
isotig07534	4	25.8	6.55268e-07	PREDICTED: GTPase IMAP family member 4-like, partial
isotig30235	16	25.8	0.00970102	PREDICTED: tripartite motif-containing protein 16-like
isotig12403	17.2	25.8	0.0165208	PREDICTED: pumilio homolog 1
isotig12218	8.8	26	9.3016e-05	complement factor B/C2-A3
isotig08932	12.2	26	0.00111699	proteasome subunit beta type-3
isotig17902	15.6	26	0.00735107	peptidyl-prolyl cis-trans isomerase B
isotig05561	5.6	26.4	3.10513e-06	PREDICTED: hypothetical protein LOC335285
isotig05562	5.6	26.4	3.10513e-06	PREDICTED: hypothetical protein LOC335285
isotig03464	12.2	26.4	0.000907371	novel protein with a AIG1 family domain (zgc:152658)
isotig14134	4	26.6	3.73267e-07	phospholipid scramblase 2
isotig02253	8.2	26.6	3.83335e-05	prolyl 4-hydroxylase alpha II-like
isotig09946	78.2	26.6	0.000310566	PREDICTED: protein NLRC3-like
isotig05783	11.4	26.6	0.000479328	proteasome maturation protein
isotig22455	18.4	26.6	0.019644	predicted protein
contig00962	4.4	26.8	5.48829e-07	hypothetical protein LOC393524
isotig11208	16.4	26.8	0.00757054	protein transport protein Sec61 subunit beta
isotig05214	14	27	0.0019893	PREDICTED: hypothetical protein LOC795321 isoform 1
isotig06948	15.8	27	0.00518299	large neutral amino acids transporter small subunit 4
isotig06949	15.8	27	0.00518299	large neutral amino acids transporter small subunit 4
isotig06146	79.8	27.2	0.000278055	claudin 5
isotig06147	79.8	27.2	0.000278055	claudin 5
isotig12165	11.4	27.2	0.000345955	vacuolar-type H+ transporting ATPase B1 subunit
isotig10630	13.8	27.2	0.00160706	chorion-specific transcription factor GCMb
isotig11201	7.8	27.4	1.60945e-05	proteasome subunit beta type-2
isotig13198	14.6	27.4	0.00229482	ATP-dependent RNA helicase DDX39
isotig17496	16.8	27.4	0.00703365	PREDICTED: hypothetical protein LOC100522912
isotig12721	96.2	27.6	2.56048e-06	Zgc:162730 protein
isotig28248	77.8	27.6	0.000600477	PREDICTED: protein NLRC3-like
isotig14085	14.2	27.6	0.00166318	DEAD (Asp-Glu-Ala-Asp) box polypeptide 39a
isotig11200	7.8	27.8	1.25162e-05	proteasome subunit beta type-2
isotig05713	12.6	27.8	0.00056494	pyruvate kinase isozymes M1/M2
isotig13789	15.6	27.8	0.00324836	eukaryotic translation initiation factor 2 subunit 2
isotig11715	82.4	28	0.000210554	WW domain-containing transcription regulator protein 1
isotig11793	211	28.2	6.21806e-26	NADH dehydrogenase subunit 1
contig02980	187.6	28.2	1.86438e-21	unnamed protein product
isotig23039	0	28.2	2.23081e-09	PREDICTED: microfibril-associated glycoprotein 4-like isoform 1
isotig02151	78.8	28.2	0.000630275	PREDICTED: desmoglein-4
isotig02570	13.6	28.2	0.000864228	LOC799918 protein
isotig17629	2.4	28.4	1.0318e-08	PREDICTED: hypothetical protein LOC100005580
isotig02430	13.8	28.4	0.00088229	PREDICTED: e3 ubiquitin/ISG15 ligase TRIM25-like
isotig14004	8.8	28.6	1.93202e-05	quinone oxidoreductase
isotig10229	86.2	28.6	0.000101184	PREDICTED: protein NLRC3
isotig13872	10.8	28.6	0.000101959	eukaryotic translation initiation factor 2, subunit 1 alpha
isotig30067	83.2	28.6	0.000235683	PREDICTED: protein NLRC3
isotig02251	11	28.8	0.000106023	LOC557059 protein
isotig07507	3.4	29	2.94573e-08	PREDICTED: uncharacterized protein C6orf150-like
isotig12500	15.6	29	0.00185067	6-phosphogluconate dehydrogenase, decarboxylating isoform 1
contig00361	103.8	29.2	6.85227e-07	CCAAT/enhancer binding protein (C/EBP), delta
isotig06771	8.2	29.4	6.72031e-06	PREDICTED: hypothetical protein LOC335285
isotig06770	8.4	29.4	8.13641e-06	PREDICTED: hypothetical protein LOC335285
isotig00001	291.6	29.6	3.2991e-41	cytochrome oxidase subunit II
isotig09945	84.6	29.6	0.000277402	PREDICTED: protein NLRC3
isotig10228	84.2	29.6	0.000309288	PREDICTED: protein NLRC3
isotig21001	17	29.6	0.00291628	ATP synthase subunit d, mitochondrial
isotig07504	19.4	29.6	0.00889306	PREDICTED: protein S100-A1
isotig20021	20.4	29.6	0.0134415	Translocon-associated protein subunit gamma
isotig06676	113	29.8	5.08988e-08	solute carrier family 12 (sodium/potassium/chloride transporters), member 10.2
isotig12853	18.2	29.8	0.00477947	PREDICTED: interferon-induced 35 kDa protein homolog
isotig17292	0	30	7.49612e-10	PREDICTED: microfibril-associated glycoprotein 4
isotig03899	3.8	30	2.55273e-08	carboxypeptidase A
isotig03900	3.8	30	2.55273e-08	carboxypeptidase A
isotig02250	11.2	30	6.24592e-05	LOC557059 protein
isotig12587	19.2	30	0.00691122	Glucose phosphate isomerase a
isotig24788	13.4	30.2	0.000270038	bloodthirsty
isotig11933	113.4	30.4	7.01686e-08	NADH dehydrogenase subunit 5
isotig11558	104	30.4	1.4834e-06	early growth response protein 1
isotig05871	9.6	30.4	1.31689e-05	PREDICTED: transposon TX1 uncharacterized 149 kDa protein-like
isotig00720	94.4	30.6	3.09532e-05	PREDICTED: probable G-protein coupled receptor 116
isotig01631	208.2	30.8	6.57296e-24	LOC561562 protein
isotig11472	3.4	30.8	8.12379e-09	PREDICTED: macrophage mannose receptor 1
isotig15248	14.8	30.8	0.000482395	novel protein
isotig12703	16.6	30.8	0.00135801	55 kDa erythrocyte membrane protein
isotig09087	3	31	3.90207e-09	PREDICTED: hypothetical protein LOC100331491
isotig22269	95.2	31	3.11555e-05	PREDICTED: protein NLRC3-like
isotig06238	19.4	31	0.00496259	scinderin like a
isotig06239	19.4	31	0.00496259	scinderin like a
isotig05486	12.4	31.2	7.83327e-05	PREDICTED: GTPase IMAP family member 7
isotig12798	17.2	31.2	0.00155088	isocitrate dehydrogenase 1 (NADP+), soluble
isotig15726	15.4	31.6	0.000463982	novel immune type receptor
isotig06885	19.2	31.6	0.00350048	LIM domain and actin-binding protein 1
isotig11547	15	31.8	0.000328392	hypoxia up-regulated protein 1 precursor
isotig06884	19.2	31.8	0.00320956	LIM domain and actin-binding protein 1
isotig10492	6	32	1.12306e-07	PREDICTED: RING finger protein 213-like
isotig11502	12.8	32.2	6.02581e-05	coatomer subunit alpha
isotig06564	13.2	32.2	8.03622e-05	poly
isotig06565	13.2	32.2	8.03622e-05	poly
isotig10550	16.8	32.2	0.000778199	Forkhead box I3b
isotig10551	16.8	32.2	0.000778199	Forkhead box I3b
isotig14843	148.4	32.4	1.49237e-12	hypothetical protein LOC337591
isotig17203	10.8	32.4	1.11755e-05	mps one binder kinase activator-like 3
isotig05485	12.6	32.6	4.15976e-05	PREDICTED: GTPase IMAP family member 7
isotig31815	94.8	32.6	8.72058e-05	PREDICTED: hypothetical protein LOC100329439
isotig17568	20.8	32.6	0.00473235	LMP7
isotig01969	142	32.8	2.26673e-11	PREDICTED: zinc finger MYM-type protein 1-like
isotig02252	9	32.8	1.71483e-06	prolyl 4-hydroxylase alpha II-like
isotig02244	13	32.8	5.00104e-05	LOC557059 protein
isotig04398	261.8	33	5.62965e-33	cytochrome b
isotig04397	261.8	33	5.62965e-33	cytochrome b
isotig09498	22.6	33.2	0.00791121	40S ribosomal protein S27
isotig10560	9.6	33.4	2.09002e-06	PREDICTED: RING finger protein 213-like
isotig12369	20	33.4	0.00233584	Histone deacetylase 1
isotig06444	155	33.6	3.83843e-13	hemoglobin beta chain
isotig04172	108.8	33.6	2.7701e-06	Copine-3
isotig03525	22	33.6	0.00526639	PREDICTED: killer cell lectin-like receptor subfamily B member 1A-like isoform 1
isotig05920	22.8	33.6	0.00732865	40S ribosomal protein s9
isotig05921	22.8	33.6	0.00732865	40S ribosomal protein s9
isotig02249	11.6	33.8	9.53492e-06	LOC557059 protein
isotig03556	97.8	33.8	7.39174e-05	carbonic anhydrase XV c
isotig07281	21.4	33.8	0.00374169	novel protein
isotig00002	362	34	1.1274e-52	cytochrome c oxidase subunit I
isotig02243	13.2	34	2.9729e-05	LOC557059 protein
isotig04637	11.8	34.2	8.89135e-06	PREDICTED: ecto-ADP-ribosyltransferase 5-like
isotig04638	11.8	34.2	8.89135e-06	PREDICTED: ecto-ADP-ribosyltransferase 5-like
isotig11930	21.8	34.2	0.00377874	tyrosine-protein kinase HCK
isotig25507	101.2	34.4	4.03272e-05	PREDICTED: protein NLRC3
isotig17240	23.2	34.6	0.00581098	peroxiredoxin-2
isotig11287	22.6	34.8	0.00417391	cytochrome c oxidase subunit Vb
isotig00665	22.6	34.8	0.00417391	PREDICTED: LOW QUALITY PROTEIN: sterile alpha motif domain-containing protein 9-like
isotig02248	11.8	35	5.5598e-06	LOC557059 protein
isotig24408	13	35	1.45508e-05	hypothetical protein LOC415253
isotig08091	7.4	35.2	6.70792e-08	PREDICTED: epigen-like
isotig11604	11	35.2	2.48338e-06	PREDICTED: malignant fibrous histiocytoma-amplified sequence 1-like
isotig02396	5.8	35.4	8.47313e-09	PREDICTED: hypothetical protein LOC100535525, partial
isotig08793	20.8	35.4	0.00142735	proteasome beta 10 subunit
isotig11286	22.2	35.4	0.00273634	ribosomal protein S26
isotig11285	22.4	35.4	0.00299016	ribosomal protein S26
isotig02395	5.8	35.8	6.42402e-09	PREDICTED: hypothetical protein LOC100535525, partial
isotig02397	5.8	35.8	6.42402e-09	PREDICTED: hypothetical protein LOC100535525, partial
isotig21073	23.6	35.8	0.00424937	Ribosomal protein S5
isotig02399	5.6	36	4.31313e-09	PREDICTED: hypothetical protein LOC100535525, partial
isotig10469	7.4	36	3.93214e-08	RecName: Full=Interferon-induced GTP-binding protein Mx; AltName: Full=Interferon-inducible Mx protein
isotig10725	5.4	36.2	2.88196e-09	interferon-inducible protein IFI58
isotig12204	14.2	36.2	1.83032e-05	tyrosine-protein kinase Lyn
isotig00633	22.6	36.2	0.00234029	novel immune type receptor
isotig06443	160.4	36.4	6.64122e-13	hemoglobin subunit beta-2
isotig02398	5.6	36.4	3.26517e-09	PREDICTED: hypothetical protein LOC100535525, partial
isotig02400	5.6	36.4	3.26517e-09	PREDICTED: hypothetical protein LOC100535525, partial
isotig04362	9	36.4	1.73203e-07	PREDICTED: hypothetical protein LOC100536385
isotig21607	19.8	36.4	0.000547204	novel protein similar to bloodthirsty (bty)
isotig02233	1.2	36.6	6.65958e-12	PREDICTED: legumain-like
isotig02235	1.2	36.6	6.65958e-12	PREDICTED: legumain-like
isotig19693	21.6	36.8	0.00113546	protein phosphatase 2 (formerly 2A), catalytic subunit, alpha isoform
isotig10815	11.8	37	1.69421e-06	IFN-regulatory factor 1
isotig29832	19.6	37	0.000371169	novel protein similar to vertebrate tripartite motif-containing family
isotig05039	21.6	37	0.00103975	PREDICTED: hypothetical protein LOC100331153
isotig10724	5.4	37.4	1.2452e-09	interferon-inducible protein IFI58
isotig13741	122	37.6	6.60039e-07	ATPase, Na+/K+ transporting, alpha 1b polypeptide
isotig05027	21	37.6	0.000588938	PREDICTED: interferon-induced protein 44
contig02149	12.2	37.8	1.48394e-06	PREDICTED: hypothetical protein LOC100330250 isoform 1
isotig31943	23.2	37.8	0.00156364	novel protein similar to vertebrate titin (TTN)
isotig13797	5.8	38.2	1.21326e-09	PREDICTED: GTPase IMAP family member 4-like, partial
isotig03665	13.8	38.4	3.90341e-06	interferon-induced protein with tetratricopeptide repeats 5-like
isotig03666	13.8	38.4	3.90341e-06	interferon-induced protein with tetratricopeptide repeats 5-like
isotig14117	13.8	38.4	3.90341e-06	PREDICTED: hypothetical protein LOC100329481
isotig03663	14	38.4	4.56656e-06	interferon-induced protein with tetratricopeptide repeats 5-like
isotig03664	14	38.4	4.56656e-06	interferon-induced protein with tetratricopeptide repeats 5-like
isotig05495	116.4	38.4	5.50482e-06	B-cell translocation protein 1
isotig05496	116.4	38.4	5.50482e-06	B-cell translocation protein 1
isotig11608	249	38.8	3.28401e-27	Rhesus blood group-associated glycoprotein
isotig05493	113	39	1.98428e-05	B-cell translocation protein 1
isotig05494	113	39	1.98428e-05	B-cell translocation protein 1
isotig00635	22.6	39.2	0.000640965	novel immune type receptor
isotig14563	7.8	39.4	6.40753e-09	ubiquitin-like
isotig03691	148.8	39.6	5.31866e-10	TSC22 domain family protein 3
isotig12252	111.4	39.8	4.65488e-05	Guanine nucleotide-binding protein GI/GS/GO gamma-5 subunit precursor
isotig01656	23	39.8	0.000598058	PREDICTED: poly
isotig02246	12.4	40	4.72261e-07	prolyl 4-hydroxylase alpha II-like
isotig21015	17.4	40	2.19787e-05	PREDICTED: phospholipase A2, major isoenzyme
isotig09824	111.2	40	5.43705e-05	PREDICTED: protein NLRC3
isotig04498	20.4	40.2	0.000125822	PREDICTED: asparaginyl-tRNA synthetase, cytoplasmic
isotig04499	20.4	40.2	0.000125822	PREDICTED: asparaginyl-tRNA synthetase, cytoplasmic
isotig13303	5.6	40.4	1.99398e-10	IFN-inducible and antiviral protein
isotig01503	141.8	40.4	9.27422e-09	plakophilin 3
isotig03524	23.2	40.4	0.000505815	PREDICTED: killer cell lectin-like receptor subfamily B member 1A-like isoform 1
isotig11545	23.6	40.6	0.000563248	PREDICTED: integrin beta-2-like
contig06957	344	40.8	2.1661e-44	RecName: Full=Ammonium transporter Rh type C; AltName: Full=Rhesus blood group family type C glycoprotein; Short=Rh family type C glycoprotein; Short=Rh type C glycoprotein
isotig02635	26.8	40.8	0.00218334	hypothetical protein LOC100124602
isotig02636	26.8	40.8	0.00218334	hypothetical protein LOC100124602
isotig02245	12.6	41.2	2.73241e-07	LOC557059 protein
isotig12960	27.8	41.2	0.00280329	heterogeneous nuclear ribonucleoprotein A/B
isotig08090	9.2	41.8	6.37954e-09	PREDICTED: epigen-like
isotig02365	117	42	3.32419e-05	NADH dehydrogenase subunit 4
isotig02366	117	42	3.32419e-05	NADH dehydrogenase subunit 4
isotig19193	15.2	42.2	1.33732e-06	PREDICTED: ES1 protein homolog, mitochondrial isoform 1
isotig04360	9.4	42.8	4.12227e-09	PREDICTED: hypothetical protein LOC100536385
isotig04361	9.4	42.8	4.12227e-09	PREDICTED: hypothetical protein LOC100536385
isotig07462	15.6	42.8	1.29893e-06	hypothetical protein LOC100170794
isotig25161	25.4	43	0.000469261	novel protein similar to vertebrate tripartite motif-containing family
isotig31490	162.4	44	1.56481e-10	PREDICTED: hypothetical protein LOC557772
isotig02350	17.8	44	3.41366e-06	Epidermis-type lipoxygenase 3
isotig05157	158.4	44.8	1.0141e-09	MHC class I antigen
isotig05156	158.6	45	1.09424e-09	MHC class I antigen
isotig13006	28.4	45	0.000790345	ATP synthase subunit alpha, mitochondrial
isotig03160	27	45.2	0.000386637	novel protein similar to bloodthirsty (bty)
isotig09588	184.6	45.4	2.50627e-13	PREDICTED: hypothetical protein LOC557772
isotig10814	16	45.4	4.03335e-07	interferon regulatory factor 1
isotig06414	5.6	45.8	4.45646e-12	PREDICTED: hypothetical protein LOC100331491
isotig09086	5.6	46	3.86958e-12	PREDICTED: hypothetical protein LOC100535525, partial
isotig06413	5.6	46.2	3.3599e-12	PREDICTED: hypothetical protein LOC100331491
isotig02230	7.2	46.2	2.94704e-11	predicted protein
isotig02229	7.2	46.2	2.94704e-11	predicted protein
isotig18151	9	46.2	2.73034e-10	F10 protein
isotig15787	163.2	46.2	5.8524e-10	PREDICTED: h-2 class I histocompatibility antigen, L-D alpha chain-like
isotig13021	29.2	46.8	0.000535449	serine/threonine-protein phosphatase 2A catalytic subunit beta isoform
isotig14670	1.6	47.2	6.64681e-15	PREDICTED: hypothetical protein LOC100330485
isotig27081	28.2	47.6	0.000242461	ribosomal protein S16
isotig07461	16.8	47.8	1.92563e-07	hypothetical protein LOC100170794
isotig17919	25	47.8	4.37672e-05	natural killer cell enhancing factor
isotig26799	30.6	48.4	0.000512092	40S ribosomal protein S30
contig04093	33.4	48.6	0.00148341	integral membrane protein 1
isotig01625	157.8	48.8	1.72427e-08	unnamed protein product
isotig23739	6	49	8.18968e-13	Gig2-like protein DreF
isotig12999	646.8	49.2	2.28964e-101	Rh type C glycoprotein2a
isotig11531	19.2	49.4	4.90071e-07	PREDICTED: signal transducer and activator of transcription 1, partial
isotig20152	21.8	49.4	2.94631e-06	actin-related protein 2/3 complex subunit 3
isotig20681	20.6	49.6	1.18804e-06	PREDICTED: probable pancreatic secretory proteinase inhibitor-like isoform 1
isotig11679	144.8	50	1.38445e-06	chemokine (C-X-C motif) ligand 12a (stromal cell-derived factor 1)
isotig03692	164.2	50.2	6.16736e-09	TSC22 domain family protein 3
isotig32150	182	50.4	2.75801e-11	MHC class II alpha chain
isotig16808	26.4	51.2	1.90388e-05	PREDICTED: hypothetical protein LOC568352
isotig06102	20.6	51.4	4.51476e-07	glucose-regulated protein 78kDa
isotig03332	176	51.6	4.21551e-10	MHC class I antigen
isotig15288	152.2	51.6	4.43342e-07	hypothetical protein LOC550268
isotig16721	29.2	51.8	6.28099e-05	novel protein
isotig10414	29	52.4	4.34395e-05	barrier-to-autointegration factor
isotig11008	32	52.4	0.000182696	proteasome activator complex subunit 1
isotig11009	32	52.4	0.000182696	proteasome activator complex subunit 1
isotig05155	176.4	52.8	8.22628e-10	MHC class I antigen
isotig06535	18.6	53	4.10778e-08	Cornifelin homolog B
isotig12067	14	53.4	5.46468e-10	PREDICTED: l-amino-acid oxidase
isotig02408	31.6	53.4	9.96752e-05	nucleophosmin
isotig02410	31.6	53.4	9.96752e-05	nucleophosmin
isotig02413	31.6	53.4	9.96752e-05	nucleophosmin
isotig02416	31.6	53.4	9.96752e-05	nucleophosmin
isotig10468	9.4	53.6	2.98753e-12	Mx protein
isotig20696	32.6	53.6	0.000145112	QM
isotig18999	33.4	53.6	0.000207157	complement factor D
isotig02119	5	53.8	6.40465e-15	PREDICTED: nidogen-2
isotig07073	33.4	54.4	0.000148988	PREDICTED: IgGFc-binding protein-like
isotig07421	31.6	54.6	5.94401e-05	Zgc:152810 protein
isotig02959	20.8	55	7.25801e-08	PREDICTED: interferon-induced very large GTPase 1-like
isotig14931	156.4	55	8.89087e-07	annexin A1c
isotig02960	22	55.2	1.56107e-07	PREDICTED: interferon-induced very large GTPase 1-like
isotig02962	22	55.4	1.40064e-07	PREDICTED: interferon-induced very large GTPase 1-like
isotig02913	3.2	55.6	1.27222e-16	novel protein similar to vertebrate interferon-induced protein 44 (IFI44)
isotig02914	3.2	55.6	1.27222e-16	novel protein similar to vertebrate interferon-induced protein 44 (IFI44)
isotig02349	24.2	57	2.73746e-07	Epidermis-type lipoxygenase 3
isotig11300	33.4	57.2	4.56487e-05	60S ribosomal protein L35
isotig11301	33.4	57.2	4.56487e-05	60S ribosomal protein L35
contig00596	36.2	57.4	0.000148703	PREDICTED: lysosome-associated membrane glycoprotein 1
isotig13321	25.4	57.6	4.41986e-07	novel protein similar to vertebrate Scm-like with four mbt domains 1 (SFMBT1)
isotig10463	16	57.8	2.44074e-10	Na+/H+ exchanger isoform 3
isotig10462	16	58	2.15697e-10	Na+/H+ exchanger isoform 3
isotig18454	25.8	58	4.65708e-07	female expressed transcript 1
isotig10658	32.8	58.2	2.20653e-05	MARCKS-like 1
isotig10659	32.8	58.2	2.20653e-05	MARCKS-like 1
isotig10429	193	59.8	4.85569e-10	periplakin
isotig10416	36.4	60.4	4.72917e-05	non-muscle cofilin 1
isotig13725	41	60.8	0.000280129	aquaporin 3
isotig19031	41.6	61	0.000327623	lysosomal protein transmembrane 5
isotig06572	251.8	61.4	8.16547e-18	Rh type C glycoprotein1
contig00524	20.2	61.4	1.1778e-09	PREDICTED: hypothetical protein LOC100332877
isotig13263	41	61.4	0.000222967	coronin-1A
isotig21817	36	62.6	1.53553e-05	PREDICTED: e3 ubiquitin/ISG15 ligase TRIM25
contig03448	238.2	63.2	3.42152e-15	PREDICTED: hypothetical protein LOC557772
isotig10428	200	63.2	5.02503e-10	periplakin
contig03526	235.4	64	1.54805e-14	PREDICTED: hypothetical protein LOC557772
isotig06569	36	64	8.32739e-06	L-lactate dehydrogenase A chain
isotig05038	34.8	64.8	3.16254e-06	PREDICTED: hypothetical protein LOC100332081
isotig02495	31.2	65	3.88815e-07	granulocyte colony-stimulating factor receptor
isotig02496	31.2	65	3.88815e-07	granulocyte colony-stimulating factor receptor
isotig02497	31.2	65	3.88815e-07	granulocyte colony-stimulating factor receptor
isotig02498	31.2	65	3.88815e-07	granulocyte colony-stimulating factor receptor
isotig15682	41.8	65.2	7.04015e-05	GTP-binding nuclear protein Ran
isotig06568	36.8	65.4	6.67613e-06	L-lactate dehydrogenase A chain
isotig06567	36.8	65.4	6.67613e-06	L-lactate dehydrogenase A chain
isotig02227	7.2	66.2	2.427e-17	PREDICTED: legumain-like
isotig02228	7.2	66.2	2.427e-17	PREDICTED: legumain-like
isotig14873	45.8	66.2	0.000233285	PREDICTED: interferon-induced protein 44
isotig13505	4.8	66.4	6.16221e-19	hypothetical protein
isotig18597	42.2	67.2	3.75442e-05	PREDICTED: e3 ubiquitin/ISG15 ligase TRIM25
isotig06570	363	67.6	1.89497e-33	Rh type C glycoprotein1
isotig06571	363	67.6	1.89497e-33	Rh type C glycoprotein1
isotig11180	10.6	68	7.23714e-16	Gig2-like protein CauD
isotig11181	10.6	68	7.23714e-16	Gig2-like protein CauD
isotig03883	39.4	68	7.59877e-06	cytokine receptor family member b13
isotig03882	40.8	68.2	1.34039e-05	cytokine receptor family member b13
isotig03884	40.8	68.2	1.34039e-05	cytokine receptor family member b13
contig00038	14	68.4	3.4109e-14	signal transducer and activator of transcription 1
isotig03396	18.6	68.4	4.15204e-12	bloodthirsty
isotig03395	19	68.4	6.0726e-12	bloodthirsty
isotig02532	1	68.6	1.01019e-20	novel protein (zgc:153654)
isotig02533	1	68.6	1.01019e-20	novel protein (zgc:153654)
isotig14871	47.8	69.8	0.000131144	Coactosin-like protein
isotig12578	47.4	70	0.000104513	actin-related protein 3
isotig06646	209.2	70.2	2.16097e-09	hypoxia-inducible factor 2 alpha
isotig06647	208.8	70.2	2.41115e-09	hypoxia-inducible factor 2 alpha
isotig20546	7.6	70.6	1.93429e-18	unnamed protein product
isotig07412	49.2	71	0.00014252	bloodthirsty-related gene family, member 9
isotig02958	39.4	71.2	1.87742e-06	PREDICTED: interferon-induced very large GTPase 1-like
isotig02961	39.4	71.4	1.71775e-06	PREDICTED: interferon-induced very large GTPase 1-like
isotig02530	1	71.6	1.66588e-21	novel protein (zgc:153654)
isotig02531	1	71.6	1.66588e-21	novel protein (zgc:153654)
isotig13866	0	71.6	3.5789e-21	PREDICTED: hypothetical protein LOC100330485
isotig03819	47	72	4.16751e-05	proteasome activator complex subunit 2
isotig10422	26.4	72.4	3.10223e-10	hypothetical protein LOC368902
isotig24465	3.2	72.6	8.94555e-22	PREDICTED: hypothetical protein LOC566658
isotig10820	8.8	72.6	2.61277e-18	hypothetical protein LOC565650
isotig10821	8.8	72.6	2.61277e-18	hypothetical protein LOC565650
isotig19665	21	72.8	2.65278e-12	hypothetical protein LOC474322
isotig02241	1	73.2	6.40529e-22	PREDICTED: legumain
isotig05037	42.6	75.2	1.57447e-06	PREDICTED: hypothetical protein LOC100332081
isotig02372	949.8	75.8	3.59023e-145	Rhesus blood group, C glycoprotein a
isotig02407	12.4	75.8	3.46514e-17	PREDICTED: hypothetical protein LOC100535525, partial
contig03488	260.6	75.8	1.97604e-14	PREDICTED: hypothetical protein LOC557772
isotig02371	949	76	7.57494e-145	Rhesus blood group, C glycoprotein a
isotig25403	8.2	76.4	7.6774e-20	Gig2-like protein DreI
isotig11601	40.2	76.4	2.71236e-07	transitional endoplasmic reticulum ATPase
isotig06622	52.8	76.4	7.54698e-05	40S ribosomal protein S15
contig03641	51.4	76.6	4.1191e-05	finTRIM family, member 14
isotig12487	49.4	77.6	1.25182e-05	protein disulfide isomerase-related protein P5 precursor
isotig06360	13.2	78.2	1.84746e-17	PREDICTED: hypothetical protein LOC100331491
isotig09942	48.8	78.2	7.64467e-06	pancreatic progenitor cell differentiation and proliferation factor A
isotig09587	260.8	79	1.50126e-13	PREDICTED: hypothetical protein LOC557772
isotig02542	51.6	79.6	1.41769e-05	carcinoembryonic antigen-related cell adhesion molecule 1
isotig02543	51.6	79.6	1.41769e-05	carcinoembryonic antigen-related cell adhesion molecule 1
isotig15550	19.2	79.8	5.86397e-15	PREDICTED: hypothetical protein LOC100331491
contig03460	260.2	79.8	2.9727e-13	PREDICTED: hypothetical protein LOC100535641
isotig06617	53.4	80.4	2.14273e-05	60S ribosomal protein L19
isotig06618	53.4	80.4	2.14273e-05	60S ribosomal protein L19
isotig11311	52.6	80.6	1.44389e-05	60S ribosomal protein L19
isotig02540	51.8	81.6	7.03648e-06	carcinoembryonic antigen-related cell adhesion molecule 1
isotig02541	51.8	81.6	7.03648e-06	carcinoembryonic antigen-related cell adhesion molecule 1
isotig11100	53.2	81.8	1.15792e-05	40S ribosomal protein S20
isotig06871	53	82.2	9.13996e-06	60S ribosomal protein L13
isotig04378	7	82.6	1.64932e-22	interferon-inducible protein Gig2
isotig03756	10.2	82.6	1.68142e-20	Gig2-like protein CauA
isotig03757	10.2	82.6	1.68142e-20	Gig2-like protein CauA
isotig03758	10.2	82.8	1.46189e-20	Gig2-like protein CauA
isotig03759	10.2	82.8	1.46189e-20	Gig2-like protein CauA
isotig04380	7	83	1.24249e-22	interferon-inducible protein Gig2
isotig04379	7.4	83.4	1.69101e-22	interferon-inducible protein Gig2
isotig06620	55.4	83.4	1.50887e-05	40S ribosomal protein S15
isotig06621	55.4	83.4	1.50887e-05	40S ribosomal protein S15
isotig11042	55.4	84.2	1.11337e-05	hypothetical protein LOC405841
isotig22104	13.4	84.8	2.64854e-19	PREDICTED: hypothetical protein LOC100331491
isotig12282	15.8	85	4.48342e-18	Mx1 protein
isotig05388	55.2	85.2	6.99544e-06	PREDICTED: protein NLRC3
contig03449	284.6	86.2	1.18572e-14	PREDICTED: hypothetical protein LOC557772
isotig06359	14	86.8	1.45224e-19	PREDICTED: hypothetical protein LOC100331491
isotig05028	53.4	86.8	1.73965e-06	PREDICTED: interferon-induced protein 44
isotig02234	7	87.4	5.51486e-24	PREDICTED: legumain-like
contig00039	12.4	87.4	1.19857e-20	signal transducer and activator of transcription 1
isotig06541	16.4	87.4	1.83915e-18	C-C motif chemokine 19 precursor
isotig18980	54.6	88.6	1.41536e-06	PREDICTED: protein cordon-bleu-like
isotig12582	6.6	89	9.85207e-25	IFN-regulatory factory 7
isotig16413	54.4	89.4	9.36645e-07	glyceraldehyde-3-phosphate dehydrogenase
isotig07452	52.6	90.4	2.72365e-07	novel protein similar to human ubiquitin-conjugating enzyme E2G 1 (UBC7 homolog, C. elegans) (UBE2G1)
isotig05389	58.2	90.8	2.70681e-06	PREDICTED: protein NLRC3
isotig12125	271.6	93.4	3.10338e-11	Krt5 protein
isotig06197	60	93.8	1.76201e-06	N-acylsphingosine amidohydrolase
isotig07174	19.6	94	9.33407e-19	novel protein similar to vertebrate interferon-induced protein 44 (IFI44)
isotig06196	60	94	1.6296e-06	N-acylsphingosine amidohydrolase
isotig01706	548	94.2	2.43847e-53	PREDICTED: hypothetical protein LOC799116
isotig03392	13.6	95	3.10563e-22	bloodthirsty-related gene family, member 6
isotig03391	14	95	5.26831e-22	bloodthirsty-related gene family, member 6
isotig02193	19	95.2	2.14797e-19	Antileukoproteinase precursor
isotig07173	19.6	95.2	4.25047e-19	novel protein containing a TLD domain
isotig02192	19	95.4	1.88231e-19	Antileukoproteinase precursor
isotig11806	15.6	96.4	1.59156e-21	interferon-induced GTP-binding protein MxA
isotig24106	8.4	97	4.91017e-26	PREDICTED: sacsin-like
isotig02194	14.8	97.6	2.5111e-22	chorionic proteinase inhibitor
isotig11264	57.6	97.6	1.33426e-07	60S ribosomal protein L11
isotig05026	59.8	98	3.03618e-07	PREDICTED: interferon-induced protein 44
isotig02189	15	98.6	1.63991e-22	chorionic proteinase inhibitor
isotig02191	15.4	98.6	2.74868e-22	chorionic proteinase inhibitor
isotig31984	59.6	102.6	4.11655e-08	PREDICTED: interferon-induced protein 44
isotig02348	46.8	102.8	3.80451e-11	Epidermis-type lipoxygenase 3
isotig02346	47	102.8	4.30329e-11	Epidermis-type lipoxygenase 3
isotig10563	41.2	103	8.63378e-13	RecName: Full=Carbonic anhydrase 2; AltName: Full=Carbonate dehydratase II; AltName: Full=Carbonic anhydrase II; Short=CA-II
isotig07411	70.4	103.2	2.99567e-06	bloodthirsty-related gene family, member 9
isotig11263	61.4	104.4	4.44795e-08	60S ribosomal protein L11
isotig23846	69.6	106	7.76848e-07	PREDICTED: NACHT, LRR and PYD domains-containing protein 12-like
isotig02347	49	107	1.82398e-11	Epidermis-type lipoxygenase 3
isotig02345	49.2	107	2.06139e-11	Epidermis-type lipoxygenase 3
isotig10528	50.6	110	1.09745e-11	Pdia4 protein
isotig10529	50.6	110	1.09745e-11	Pdia4 protein
isotig08040	28.8	112	1.46749e-19	PREDICTED: protein NLRC3-like
isotig08039	29	112	1.78673e-19	PREDICTED: protein NLRC3-like
contig06547	3.2	112.8	1.47787e-33	transcobalamin 1
isotig02190	20.4	112.8	9.19189e-24	chorionic proteinase inhibitor
isotig02188	20.4	113	8.03966e-24	chorionic proteinase inhibitor
isotig03294	73.4	114.2	1.54751e-07	PREDICTED: tripartite motif-containing protein 16-like
isotig03296	73.2	115.2	9.67257e-08	PREDICTED: tripartite motif-containing protein 16-like
isotig03295	73.2	115.6	8.27347e-08	PREDICTED: tripartite motif-containing protein 16-like
isotig27062	21	116.8	1.29918e-24	novel protein similar to human c-Maf-inducing protein (CMIP)
isotig02113	4.8	119.2	6.53038e-35	transcobalamin 1
isotig10562	42.2	122.6	3.73677e-17	RecName: Full=Carbonic anhydrase 2; AltName: Full=Carbonate dehydratase II; AltName: Full=Carbonic anhydrase II; Short=CA-II
isotig27012	88	129.4	1.52643e-07	PREDICTED: protein NLRC3
isotig13068	88.4	130	1.42458e-07	tubulin alpha-4A chain
isotig13343	78.8	133.8	6.12961e-10	glyceraldehyde 3-phosphate dehydrogenase, testis-specific
isotig13180	89.4	137.4	1.3388e-08	tubulin, alpha 2
isotig10758	89.8	139	8.54212e-09	tubulin alpha 6
isotig10759	89.8	139	8.54212e-09	tubulin alpha 6
isotig05731	651.8	139.4	6.44812e-51	ammonium transporter Rh type B
isotig05732	651.8	139.4	6.44812e-51	ammonium transporter Rh type B
isotig12622	77.8	142.2	1.04802e-11	protein disulfide isomerase family A, member 3
isotig11712	26.2	143	1.6453e-29	matrix metalloproteinase 9
isotig13381	92	143.4	3.84423e-09	tubulin alpha-1C chain
isotig05875	9	145.4	1.82109e-40	ubquitin-like protein 2
isotig02199	10	148	1.23047e-40	ubquitin-like protein 1
isotig02200	10	148	1.23047e-40	ubquitin-like protein 1
isotig30797	55	149.6	2.0615e-19	PREDICTED: insulin receptor substrate 1-B-like
isotig05874	10.4	153.4	4.93117e-42	ubquitin-like protein 1
isotig22445	52.6	156.4	7.01534e-22	fibronectin 1b
isotig31086	66.8	156.8	1.75233e-17	dephospho-CoA kinase, putative
isotig02195	10.6	158	2.5977e-43	ubquitin-like protein 1
isotig02196	10.6	158	2.5977e-43	ubquitin-like protein 1
isotig02197	10.6	159.4	9.71499e-44	ubquitin-like protein 1
isotig02198	10.6	159.4	9.71499e-44	ubquitin-like protein 1
isotig14171	69	161.6	6.3086e-18	E3 ubiquitin-protein ligase MARCH7
isotig17104	63.8	162.2	1.34704e-19	PREDICTED: basement membrane-specific heparan sulfate proteoglycan core protein-like
isotig08442	65	162.8	2.2714e-19	PREDICTED: formin-binding protein 4
isotig13708	69	164.8	1.21449e-18	transmembrane protein 33
contig03583	112.6	165	3.54728e-09	PREDICTED: tripartite motif-containing protein 16 isoform 2
isotig31776	66.6	169	2.58382e-20	bicaudal D-related protein 2
isotig07699	505	173	9.43929e-20	Krt4 protein
isotig15592	122.6	177.8	1.40426e-09	PREDICTED: tripartite motif-containing protein 16 isoform 1
isotig12045	75	182.4	7.28596e-21	PREDICTED: hypothetical protein LOC100503813
isotig03013	5.6	184	1.43178e-53	PREDICTED: legumain-like
isotig32130	58	186.8	1.45318e-27	zinc finger protein 609
isotig28028	58.8	187	2.56209e-27	zinc finger with UFM1-specific peptidase domain-like
isotig03722	116.6	187.2	4.00426e-12	PREDICTED: interferon-induced protein 44
isotig03011	15.8	188.6	2.34231e-49	PREDICTED: legumain-like
isotig03012	16	188.6	3.14381e-49	PREDICTED: legumain-like
isotig03937	115.8	195	1.23952e-13	PREDICTED: interferon-induced protein 44
isotig03935	120.6	198	3.04326e-13	PREDICTED: interferon-induced protein 44
isotig02658	16.6	200	2.48312e-52	interferon-inducible protein Gig1
isotig02660	16.6	200	2.48312e-52	interferon-inducible protein Gig1
isotig02661	16.6	200	2.48312e-52	interferon-inducible protein Gig1
isotig02662	16.6	200	2.48312e-52	interferon-inducible protein Gig1
isotig03591	36.8	201.2	7.31186e-41	nephrosin precursor
isotig03592	36.8	201.2	7.31186e-41	nephrosin precursor
isotig03593	36.8	201.2	7.31186e-41	nephrosin precursor
isotig02655	16.6	201.6	8.05025e-53	interferon-inducible protein Gig1
isotig02656	16.6	201.6	8.05025e-53	interferon-inducible protein Gig1
isotig02657	16.6	201.6	8.05025e-53	interferon-inducible protein Gig1
isotig02659	16.6	201.6	8.05025e-53	interferon-inducible protein Gig1
isotig14755	134	204.2	6.7581e-12	PREDICTED: interferon-induced protein 44-like
isotig03936	126.2	210.4	2.38186e-14	PREDICTED: interferon-induced protein 44-like
isotig03934	126.8	212.2	1.49578e-14	PREDICTED: interferon-induced protein 44-like
isotig03933	131.4	215.2	3.33519e-14	PREDICTED: interferon-induced protein 44-like
isotig03932	131.6	215.2	3.63478e-14	PREDICTED: interferon-induced protein 44-like
isotig03720	144.6	215.6	5.82185e-12	PREDICTED: interferon-induced protein 44
isotig03721	148.4	216.2	1.90831e-11	PREDICTED: interferon-induced protein 44
isotig03719	146.8	217.8	5.96648e-12	PREDICTED: interferon-induced protein 44
isotig05873	126.6	221	3.57936e-16	ubquitin-like protein 2
isotig01698	94.2	221.4	4.54384e-24	zinc finger CCHC domain-containing protein 24
isotig00081	97	239.4	2.64279e-27	galectin 3 binding protein
isotig00388	23.6	240	4.25919e-60	unnamed protein product
contig00627	100	254	9.54293e-30	PREDICTED: CUB and zona pellucida-like domain-containing protein 1-like
isotig15224	8.2	300.6	1.68964e-86	PREDICTED: hypothetical protein LOC795145
isotig04127	38	319.6	2.38708e-75	matrix metalloproteinase 13
isotig04128	38	321.6	5.93843e-76	matrix metalloproteinase 13
isotig04125	38	322.2	3.91175e-76	matrix metalloproteinase 13
isotig04126	38	322.2	3.91175e-76	matrix metalloproteinase 13
isotig01544	80.4	332.6	4.97194e-57	PREDICTED: CUB and zona pellucida-like domain-containing protein 1-like
isotig00063	148	366.2	5.49727e-41	galectin-3-binding protein A precursor
isotig20400	30.6	436.4	1.46243e-115	PREDICTED: urokinase plasminogen activator surface receptor-like
isotig23536	210.2	538.8	9.43084e-62	Cdc42-like protein
isotig26419	207.8	540	9.04508e-63	ZZ-type zinc finger-containing protein 3
isotig30744	203.8	540.4	4.07621e-64	zinc finger protein 277
isotig31123	208	540.4	8.42472e-63	PREDICTED: chromodomain-helicase-DNA-binding protein 6
isotig20868	206.6	551	1.02047e-65	PREDICTED: NFX1-type zinc finger-containing protein 1-like
isotig16742	211	554.4	3.98698e-65	sulfotransferase family 1, cytosolic sulfotransferase 5
isotig06334	134.4	564.4	2.16521e-96	protein C
isotig06335	134.4	564.4	2.16521e-96	protein C
isotig17561	230.6	572.2	3.04503e-63	OTU domain, ubiquitin aldehyde binding 1, like
isotig12888	243	611.8	1.4695e-68	disco-interacting protein 2 homolog B-A
isotig32125	225.4	621	3.11536e-76	Pnpo protein
isotig05913	207.2	774.6	8.11312e-122	40S ribosomal protein S7
isotig05914	207.2	774.6	8.11312e-122	40S ribosomal protein S7
isotig31597	146.2	789.8	3.93499e-154	hypothetical protein LOC100003031
isotig32216	164.6	830.4	1.78741e-156	hypothetical protein LOC100003031
contig03837	60.8	852.8	2.77238e-223	PREDICTED: urokinase plasminogen activator surface receptor-like
isotig25768	61.6	923.6	2.57393e-244	PREDICTED: urokinase plasminogen activator surface receptor-like
contig03851	61	937.6	6.08776e-249	PREDICTED: urokinase plasminogen activator surface receptor-like
contig03832	64	957.4	4.32701e-253	PREDICTED: urokinase plasminogen activator surface receptor-like
isotig20258	65.8	999.4	9.91985e-265	PREDICTED: urokinase plasminogen activator surface receptor-like
contig03835	62.4	1000	5.17051e-267	PREDICTED: urokinase plasminogen activator surface receptor-like
isotig20343	66.4	1003	1.88915e-265	PREDICTED: urokinase plasminogen activator surface receptor-like
isotig20855	65.4	1017.2	2.20519e-270	PREDICTED: urokinase plasminogen activator surface receptor-like
contig03856	66.6	1045.8	2.54133e-278	PREDICTED: urokinase plasminogen activator surface receptor-like
isotig11020	202.8	1499	0	elastase 1
isotig11021	202.8	1499	0	elastase 1
isotig00054	208	1591.2	0	hypothetical protein LOC100003031
isotig18907	919.4	1960.2	1.51328e-176	H2A histone family, member V isoform 1 variant
