# Supplementary material for: Transcriptome and expression profiling analysis of Leuciscus waleckii : an exploration of the alkali-adapted mechanisms of a freshwater teleost
Source: Royal Society of Chemistry journal article supplement (doi:10.1039/c3mb70318e), 2013-12-04
Supplement: c3mb70318e_3.xlsx [file c3mb70318e_3.xlsx]

## Sheet: Sheet1
Additional table 3. Obviously changed contigs in kidney of L. waleckii
contig	alkaline reads number	freshwater reads number	p-value	NR annotation
isotig18131	5	0	0.0398325	Zgc:101121 [Danio rerio]
isotig21709	5	0	0.0398325	unnamed protein product [Tetraodon nigroviridis]
isotig25784	5	0	0.0398325	unnamed protein product [Tetraodon nigroviridis]
isotig29735	5	0	0.0398325	unnamed protein product [Tetraodon nigroviridis]
isotig29401	5	0	0.0398325	TBC1 domain family, member 10C, isoform CRA_c [Homo sapiens]
isotig26643	5	0	0.0398325	sorting nexin-2 [Danio rerio]
isotig22512	5	0	0.0398325	RecName: Full=Vascular endothelial growth factor receptor kdr-like; AltName: Full=Fetal liver kinase 1; Short=FLK-1; AltName: Full=Kinase insert domain receptor-A; AltName: Full=Kinase insert domain receptor-like; AltName: Full=Protein-tyrosine kinase receptor flk-1; AltName: Full=Vascular endothelial growth factor receptor 4; Short=VEGFR-4; Flags: Precursor
isotig26733	5	0	0.0398325	RecName: Full=Centromere protein P; Short=CENP-P
isotig16488	5	0	0.0398325	Rbm4.2 protein [Danio rerio]
isotig19717	5	0	0.0398325	protein DPCD [Danio rerio]
isotig16967	5	0	0.0398325	protein ARV1 [Danio rerio]
isotig27905	5	0	0.0398325	PREDICTED: zinc finger protein 462-like [Danio rerio]
isotig08032	5	0	0.0398325	PREDICTED: zinc finger protein 280D [Danio rerio]
isotig29798	5	0	0.0398325	PREDICTED: TBC1 domain family member 14 isoform 1 [Danio rerio]
isotig19395	5	0	0.0398325	PREDICTED: sodium/myo-inositol cotransporter-like [Danio rerio]
isotig25705	5	0	0.0398325	PREDICTED: similar to zinc finger protein [Strongylocentrotus purpuratus]
isotig09657	5	0	0.0398325	PREDICTED: similar to transposase [Strongylocentrotus purpuratus]
isotig27204	5	0	0.0398325	PREDICTED: secretory phospholipase A2 receptor-like [Danio rerio]
isotig31165	5	0	0.0398325	PREDICTED: rho GTPase-activating protein 29 [Danio rerio]
isotig31379	5	0	0.0398325	PREDICTED: receptor-type tyrosine-protein phosphatase gamma [Danio rerio]
isotig32090	5	0	0.0398325	PREDICTED: protein furry homolog [Danio rerio]
isotig28412	5	0	0.0398325	PREDICTED: polyribonucleotide 5&apos;-hydroxyl-kinase Clp1-like [Danio rerio]
isotig20159	5	0	0.0398325	PREDICTED: myosin-X [Danio rerio]
isotig27704	5	0	0.0398325	PREDICTED: LON peptidase N-terminal domain and RING finger protein 1-like [Danio rerio]
isotig22131	5	0	0.0398325	PREDICTED: kelch-like 24 (Drosophila) [Taeniopygia guttata]
isotig08797	5	0	0.0398325	PREDICTED: interleukin-1 receptor type 1-like [Danio rerio]
isotig08621	5	0	0.0398325	PREDICTED: hypothetical protein LOC569976 [Danio rerio]
isotig08622	5	0	0.0398325	PREDICTED: hypothetical protein LOC569976 [Danio rerio]
isotig16808	5	0	0.0398325	PREDICTED: hypothetical protein LOC568352 [Danio rerio]
isotig16972	5	0	0.0398325	PREDICTED: hypothetical protein LOC567501 [Danio rerio]
isotig30058	5	0	0.0398325	PREDICTED: hypothetical protein LOC559152 [Danio rerio]
isotig18045	5	0	0.0398325	PREDICTED: hypothetical protein LOC553504 [Danio rerio]
isotig16454	5	0	0.0398325	PREDICTED: hypothetical protein LOC100333266 isoform 1 [Danio rerio]
isotig22316	5	0	0.0398325	PREDICTED: hypothetical protein LOC100330630 [Danio rerio]
isotig14451	5	0	0.0398325	PREDICTED: GTPase IMAP family member 8-like [Danio rerio]
isotig03807	5	0	0.0398325	PREDICTED: GTPase IMAP family member 8 [Danio rerio]
isotig28351	5	0	0.0398325	PREDICTED: gametogenetin-binding protein 2-like [Anolis carolinensis]
isotig16170	5	0	0.0398325	PREDICTED: disks large homolog 3-like [Danio rerio]
isotig10199	5	0	0.0398325	PREDICTED: CXXC-type zinc finger protein 5-like [Meleagris gallopavo]
isotig01047	5	0	0.0398325	PREDICTED: c-type mannose receptor 2-like [Danio rerio]
isotig28408	5	0	0.0398325	PREDICTED: c-type mannose receptor 2-like [Danio rerio]
isotig28254	5	0	0.0398325	PREDICTED: claspin-like, partial [Danio rerio]
isotig21865	5	0	0.0398325	PREDICTED: ADP-ribosylation factor-like protein 6-interacting protein 4-like [Danio rerio]
isotig22907	5	0	0.0398325	nrf2-associated protein keap1a [Danio rerio]
isotig17506	5	0	0.0398325	novel protein similar to vertebrate osteopetrosis associated transmembrane protein 1 (OSTM1) [Danio rerio]
isotig30573	5	0	0.0398325	novel protein similar to vertebrate AF4/FMR2 family [Danio rerio]
isotig21437	5	0	0.0398325	Ngfrl protein [Danio rerio]
isotig11921	5	0	0.0398325	nardilysin [Danio rerio]
isotig29010	5	0	0.0398325	mitogen-activated protein kinase kinase kinase kinase 2 [Danio rerio]
isotig27659	5	0	0.0398325	LOC100150665 protein [Danio rerio]
isotig26665	5	0	0.0398325	histone H2A deubiquitinase MYSM1 [Danio rerio]
isotig24486	5	0	0.0398325	glucose-6-phosphate translocase [Danio rerio]
isotig05942	5	0	0.0398325	GA-binding protein alpha chain [Danio rerio]
isotig30171	5	0	0.0398325	forkhead box protein K1 [Danio rerio]
isotig15045	5	0	0.0398325	exocyst complex component 5 [Danio rerio]
isotig17803	5	0	0.0398325	dynactin 1a [Danio rerio]
isotig15256	5	0	0.0398325	claudin i [Danio rerio]
isotig18631	5	0	0.0398325	chromodomain helicase DNA binding protein 4 [Danio rerio]
isotig21670	5	0	0.0398325	arsenite methyltransferase [Danio rerio]
isotig18504	5	0	0.0398325	ankyrin repeat and sterile alpha motif domain-containing protein 1B [Danio rerio]
isotig15266	5	0	0.0398325	actin-related protein 6 [Danio rerio]
isotig20057	6	0	0.0202863	vitronectin a [Danio rerio]
isotig18173	6	0	0.0202863	transmembrane protein 129 precursor [Danio rerio]
isotig14941	6	0	0.0202863	TPA: transposase domain-containing protein [Danio rerio]
isotig25992	6	0	0.0202863	reverse transcriptase [Oryzias latipes]
isotig25928	6	0	0.0202863	retinal pigment epithelium-specific protein 65kDa [Danio rerio]
isotig16448	6	0	0.0202863	regulator of G-protein signaling 2 [Danio rerio]
isotig32203	6	0	0.0202863	RALBP1 associated Eps domain containing 1, isoform CRA_c [Homo sapiens]
isotig15396	6	0	0.0202863	protein SLC7A6OS [Danio rerio]
isotig16394	6	0	0.0202863	probable serine carboxypeptidase CPVL [Danio rerio]
isotig30453	6	0	0.0202863	PREDICTED: zinc finger protein 644-like [Danio rerio]
isotig30255	6	0	0.0202863	PREDICTED: similar to zinc finger protein [Hydra magnipapillata]
isotig22909	6	0	0.0202863	PREDICTED: poly [ADP-ribose] polymerase 4 [Danio rerio]
isotig10810	6	0	0.0202863	PREDICTED: interferon-inducible GTPase 5-like [Danio rerio]
isotig15661	6	0	0.0202863	PREDICTED: hypothetical protein LOC565630 [Danio rerio]
isotig21758	6	0	0.0202863	PREDICTED: f-box only protein 34 [Danio rerio]
isotig31504	6	0	0.0202863	PREDICTED: DNA damage-regulated autophagy modulator protein 2 [Danio rerio]
isotig09306	6	0	0.0202863	PREDICTED: cytochrome c oxidase subunit 5A, mitochondrial isoform 1 [Danio rerio]
isotig09307	6	0	0.0202863	PREDICTED: cytochrome c oxidase subunit 5A, mitochondrial isoform 1 [Danio rerio]
isotig27184	6	0	0.0202863	PREDICTED: complement C4-like [Danio rerio]
isotig19742	6	0	0.0202863	post-GPI attachment to proteins factor 2 [Danio rerio]
isotig27361	6	0	0.0202863	pol-like protein [Danio rerio]
isotig16813	6	0	0.0202863	phosphoglycolate phosphatase [Xenopus (Silurana) tropicalis]
isotig20935	6	0	0.0202863	Phosphatidylinositol N-acetylglucosaminyltransferase subunit Y [Osmerus mordax]
isotig15928	6	0	0.0202863	Parkinson disease 7 domain-containing protein 1 precursor [Danio rerio]
isotig28466	6	0	0.0202863	novel protein similar to vertebrate dedicator of cytokinesis 9 (DOCK9) [Danio rerio]
isotig30798	6	0	0.0202863	novel protein [Danio rerio]
isotig28000	6	0	0.0202863	LOC570832 protein [Danio rerio]
isotig13743	6	0	0.0202863	LOC100006078 protein [Danio rerio]
isotig16087	6	0	0.0202863	iduronate 2-sulfatase [Danio rerio]
isotig20504	6	0	0.0202863	growth and transformation-dependent protein [Danio rerio]
isotig25971	6	0	0.0202863	GRB2-related adaptor protein 2 [Danio rerio]
isotig20065	6	0	0.0202863	GA-binding protein alpha chain [Danio rerio]
isotig19273	6	0	0.0202863	fibronectin 1b [Danio rerio]
isotig26685	6	0	0.0202863	dermacan [Xenocypris argentea]
isotig05761	6	0	0.0202863	claudin k [Danio rerio]
isotig23525	6	0	0.0202863	Angiotensinogen [Danio rerio]
isotig29115	6	0	0.0202863	adenomatosis polyposis coli [Danio rerio]
isotig13108	6	0	0.0202863	3-hydroxy-3-methylglutaryl-Coenzyme A reductase [Danio rerio]
isotig24365	7	0	0.0104284	unnamed protein product [Tetraodon nigroviridis]
isotig28593	7	0	0.0104284	unnamed protein product [Tetraodon nigroviridis]
isotig27261	7	0	0.0104284	tyrosine aminotransferase [Danio rerio]
isotig12869	7	0	0.0104284	ribosome production factor 1 [Danio rerio]
isotig19307	7	0	0.0104284	ribosome binding protein 1 homolog 180kDa [Danio rerio]
isotig25280	7	0	0.0104284	RecName: Full=Tryptophan 2,3-dioxygenase A; Short=TDO-A; AltName: Full=Tryptamin 2,3-dioxygenase A; AltName: Full=Tryptophan oxygenase A; Short=TO-A; Short=TRPO-A; AltName: Full=Tryptophan pyrrolase A; AltName: Full=Tryptophanase A
isotig18075	7	0	0.0104284	RecName: Full=Carbohydrate sulfotransferase 11; AltName: Full=Chondroitin 4-O-sulfotransferase 1; AltName: Full=Chondroitin 4-sulfotransferase 1; Short=C4ST-1; Short=C4ST1; Short=zC4ST-1
isotig23001	7	0	0.0104284	PREDICTED: ribosome-binding protein 1 [Danio rerio]
isotig30583	7	0	0.0104284	PREDICTED: ras-related protein Rab-31-like [Danio rerio]
isotig30170	7	0	0.0104284	PREDICTED: poly(A) RNA polymerase, mitochondrial-like [Danio rerio]
isotig26572	7	0	0.0104284	PREDICTED: phospholipase A2, major isoenzyme [Danio rerio]
isotig18044	7	0	0.0104284	PREDICTED: hypothetical protein LOC566825 [Danio rerio]
isotig26096	7	0	0.0104284	PREDICTED: hypothetical protein LOC566752 [Danio rerio]
isotig07067	7	0	0.0104284	PREDICTED: hypothetical protein LOC564009 [Danio rerio]
isotig18798	7	0	0.0104284	PREDICTED: hypothetical protein LOC558079 [Danio rerio]
isotig28898	7	0	0.0104284	PREDICTED: hypothetical protein LOC394209 isoform 1 [Danio rerio]
isotig09631	7	0	0.0104284	PREDICTED: hypothetical protein LOC100002532 [Danio rerio]
isotig09632	7	0	0.0104284	PREDICTED: hypothetical protein LOC100002532 [Danio rerio]
isotig22874	7	0	0.0104284	PREDICTED: hypothetical protein [Ornithorhynchus anatinus]
isotig15112	7	0	0.0104284	phosphatidylinositol 4-kinase type 2-beta [Danio rerio]
isotig19840	7	0	0.0104284	PDZ and LIM domain protein 4 [Danio rerio]
isotig28673	7	0	0.0104284	novel protein similar to vertebrate receptor (TNFRSF)-interacting serine-threonine kinase 1 (RIPK1) [Danio rerio]
isotig26080	7	0	0.0104284	novel protein (zgc:56119) [Danio rerio]
isotig22171	7	0	0.0104284	KIN, antigenic determinant of recA protein homolog (mouse) [Danio rerio]
isotig28570	7	0	0.0104284	hypothetical protein LOC393413 [Danio rerio]
isotig06439	7	0	0.0104284	heat shock factor binding protein 1-like [Danio rerio]
isotig06440	7	0	0.0104284	heat shock factor binding protein 1-like [Danio rerio]
isotig21781	7	0	0.0104284	FAT tumor suppressor homolog 1 [Danio rerio]
isotig05760	7	0	0.0104284	claudin k [Danio rerio]
isotig28162	7	0	0.0104284	carbohydrate sulfotransferase 14 [Danio rerio]
isotig19113	7	0	0.0104284	cAMP-specific 3&apos;,5&apos;-cyclic phosphodiesterase 4D isoform PDE4D7 [Homo sapiens]
isotig11985	7	0	0.0104284	calpain-9 [Danio rerio]
isotig09368	7	0	0.0104284	Bmpr1a protein [Danio rerio]
isotig25776	7	0	0.0104284	ATPase, Ca++ transporting, plasma membrane 1b [Danio rerio]
isotig16004	8	0	0.00540631	Zgc:63514 [Danio rerio]
isotig23967	8	0	0.00540631	vitronectin a [Danio rerio]
isotig21254	8	0	0.00540631	unnamed protein product [Tetraodon nigroviridis]
isotig24315	8	0	0.00540631	unnamed protein product [Tetraodon nigroviridis]
isotig23307	8	0	0.00540631	ubiquitin-like [Danio rerio]
isotig26178	8	0	0.00540631	transforming growth factor beta-2 [Danio rerio]
isotig19547	8	0	0.00540631	SLAIN motif family, member 2 [Xenopus (Silurana) tropicalis]
isotig26365	8	0	0.00540631	secreted immunoglobulin domain 4 [Danio rerio]
isotig26503	8	0	0.00540631	reverse transcriptase [Oryzias latipes]
isotig30766	8	0	0.00540631	PREDICTED: serine/threonine-protein phosphatase 6 regulatory ankyrin repeat subunit B [Danio rerio]
isotig18118	8	0	0.00540631	PREDICTED: protein Z-dependent protease inhibitor [Danio rerio]
isotig21909	8	0	0.00540631	PREDICTED: nocturnin [Danio rerio]
isotig11790	8	0	0.00540631	PREDICTED: hypothetical protein [Gallus gallus]
isotig27025	8	0	0.00540631	novel protein similar to vertebrate coiled-coil-helix-coiled-coil-helix domain containing 3 (CHCHD3) [Danio rerio]
isotig08767	8	0	0.00540631	novel protein similar to polo-like kinase 2 (Drosophila) (PLK2, zgc:165644) [Danio rerio]
isotig24731	8	0	0.00540631	NADH dehydrogenase 1 beta subcomplex subunit 2, mitochondrial precursor [Anoplopoma fimbria]
isotig20578	8	0	0.00540631	major facilitator superfamily domain-containing protein 5 [Danio rerio]
isotig08012	8	0	0.00540631	leukocyte receptor cluster member 8 homolog [Danio rerio]
isotig12001	8	0	0.00540631	hypothetical protein LOC777616 [Danio rerio]
isotig21088	8	0	0.00540631	glycerol-3-phosphate dehydrogenase 1b [Danio rerio]
isotig24633	8	0	0.00540631	F5 protein [Danio rerio]
isotig19397	8	0	0.00540631	F10 protein [Danio rerio]
isotig29314	8	0	0.00540631	complement component C9 [Ctenopharyngodon idella]
isotig09369	8	0	0.00540631	bone morphogenetic protein receptor, type 1a [Danio rerio]
isotig29423	8	0	0.00540631	biotinidase [Danio rerio]
isotig12575	8	0	0.00540631	ataxin-1 [Danio rerio]
isotig22651	8	0	0.00540631	Angptl3 protein [Danio rerio]
isotig21965	8	0	0.00540631	Activin receptor type-1 precursor [Salmo salar]
isotig19304	8	0	0.00540631	2-amino-3-carboxymuconate-6-semialdehyde decarboxylase [Danio rerio]
isotig24598	8	0	0.00540631	28S ribosomal protein S7, mitochondrial precursor [Danio rerio]
isotig19408	9	0	0.00282464	sterol regulatory element-binding protein 1 [Salmo salar]
isotig08592	9	0	0.00282464	protein YIF1B [Danio rerio]
isotig17317	9	0	0.00282464	PREDICTED: similar to polyprotein [Taeniopygia guttata]
isotig21741	9	0	0.00282464	PREDICTED: RNA-directed DNA polymerase from mobile element jockey-like [Xenopus (Silurana) tropicalis]
isotig25190	9	0	0.00282464	PREDICTED: RING finger protein 213-like [Danio rerio]
isotig10538	9	0	0.00282464	PREDICTED: LOW QUALITY PROTEIN: disabled homolog 2 [Danio rerio]
isotig10539	9	0	0.00282464	PREDICTED: LOW QUALITY PROTEIN: disabled homolog 2 [Danio rerio]
isotig07066	9	0	0.00282464	PREDICTED: hypothetical protein LOC564009 [Danio rerio]
isotig15385	9	0	0.00282464	PREDICTED: hypothetical protein LOC100334929 [Danio rerio]
isotig25661	9	0	0.00282464	PREDICTED: c-type lectin domain family 10 member A-like isoform 2 [Macaca mulatta]
isotig26700	9	0	0.00282464	PREDICTED: alpha-2-antiplasmin [Danio rerio]
isotig09257	9	0	0.00282464	nucleoside diphosphate kinase, mitochondrial [Danio rerio]
isotig09258	9	0	0.00282464	nucleoside diphosphate kinase, mitochondrial [Danio rerio]
isotig09344	9	0	0.00282464	immunoglobulin heavy chain [Danio rerio]
isotig16047	9	0	0.00282464	hypothetical protein LOC327355 [Danio rerio]
isotig24347	9	0	0.00282464	coiled-coil domain-containing protein 12 [Danio rerio]
isotig25263	9	0	0.00282464	coagulation factor IX [Danio rerio]
isotig25656	10	0	0.00148647	ribosome biogenesis protein BMS1 homolog [Danio rerio]
isotig08591	10	0	0.00148647	protein YIF1B [Danio rerio]
isotig23830	10	0	0.00148647	PREDICTED: laminin subunit beta-2 [Danio rerio]
isotig03104	10	0	0.00148647	PREDICTED: hypothetical protein LOC798456 [Danio rerio]
isotig03106	10	0	0.00148647	PREDICTED: hypothetical protein LOC798456 [Danio rerio]
isotig21061	10	0	0.00148647	PREDICTED: hypothetical protein LOC570370 [Danio rerio]
isotig32126	10	0	0.00148647	induced in neural crest by AP2, 1b [Danio rerio]
isotig08404	10	0	0.00148647	hypothetical protein LOC796447 [Danio rerio]
isotig22079	10	0	0.00148647	hyaluronan-binding protein 2 [Danio rerio]
isotig25797	11	0	0.000787537	Vtnb protein [Danio rerio]
isotig14294	11	0	0.000787537	PREDICTED: transmembrane protein 97 [Danio rerio]
isotig03103	11	0	0.000787537	PREDICTED: hypothetical protein LOC798456 [Danio rerio]
isotig03105	11	0	0.000787537	PREDICTED: hypothetical protein LOC798456 [Danio rerio]
isotig23116	11	0	0.000787537	PREDICTED: hypothetical protein LOC100537950 [Danio rerio]
isotig17072	11	0	0.000787537	PREDICTED: bromodomain and PHD finger-containing protein 3 [Danio rerio]
isotig25767	11	0	0.000787537	polymerase I and transcript release factor isoform 2 [Danio rerio]
isotig05843	11	0	0.000787537	Platelet endothelial cell adhesion molecule precursor [Salmo salar]
isotig23757	11	0	0.000787537	plasminogen [Danio rerio]
isotig29354	11	0	0.000787537	hypothetical protein LOC570390 [Danio rerio]
isotig31725	11	0	0.000787537	hypothetical protein LOC569178 [Danio rerio]
isotig22793	11	0	0.000787537	ceruloplasmin [Danio rerio]
isotig17924	12	0	0.000419884	Sfrs18 protein [Danio rerio]
isotig13054	12	0	0.000419884	RecName: Full=Ras-GEF domain-containing family member 1B-A
isotig27828	12	0	0.000419884	RecName: Full=Hypermethylated in cancer 2 protein
isotig03102	12	0	0.000419884	PREDICTED: hypothetical protein LOC798456 [Danio rerio]
isotig14796	12	0	0.000419884	PREDICTED: hypothetical protein LOC100001665 [Danio rerio]
isotig26000	12	0	0.000419884	PREDICTED: alpha-globin transcription factor CP2-like isoform 1 [Anolis carolinensis]
isotig17380	12	0	0.000419884	organic solute transporter subunit alpha [Danio rerio]
isotig24428	12	0	0.000419884	LOC563100 protein [Danio rerio]
isotig09112	12	0	0.000419884	Guanine nucleotide-binding protein GI/GS/GO gamma-5 subunit precursor [Osmerus mordax]
isotig28199	12	0	0.000419884	Fras1 related extracellular matrix protein 2b [Danio rerio]
isotig25812	12	0	0.000419884	cytochrome P450, family 4, subfamily V, polypeptide 2 [Danio rerio]
isotig17536	12	0	0.000419884	cyclic AMP-dependent transcription factor ATF-3 [Danio rerio]
isotig19342	13	0	0.000225202	Si:dkey-38l12.3 protein [Danio rerio]
isotig15483	13	0	0.000225202	sex hormone-binding globulin type-I [Cyprinus carpio]
isotig28872	13	0	0.000225202	rab11 family-interacting protein 4B [Danio rerio]
isotig03101	13	0	0.000225202	PREDICTED: hypothetical protein LOC798456 [Danio rerio]
isotig17663	13	0	0.000225202	plasminogen [Danio rerio]
isotig22670	13	0	0.000225202	LOC567075 protein [Danio rerio]
isotig20127	13	0	0.000225202	intelectin [Ctenopharyngodon idella]
isotig23724	13	0	0.000225202	disks large-associated protein 5 [Danio rerio]
isotig16741	13	0	0.000225202	cytochrome P450, family 4, subfamily V, polypeptide 2 [Danio rerio]
isotig27751	13	0	0.000225202	coenzyme Q-binding protein COQ10 homolog, mitochondrial [Danio rerio]
isotig27028	14	0	0.000121467	sorting nexin-30 [Danio rerio]
isotig15744	14	0	0.000121467	PREDICTED: transmembrane glycoprotein NMB [Danio rerio]
isotig30640	14	0	0.000121467	PREDICTED: inter-alpha-trypsin inhibitor heavy chain H3-like [Danio rerio]
isotig16916	14	0	0.000121467	oxidoreductase HTATIP2 [Danio rerio]
isotig21312	14	0	0.000121467	hepatic triacylglycerol lipase [Danio rerio]
isotig20553	14	0	0.000121467	apolipoprotein C-II [Hemibarbus mylodon]
isotig08450	15	0	6.58667e-05	Zgc:73324 protein [Danio rerio]
isotig05581	15	0	6.58667e-05	Ubiquitin-like protein precursor [Esox lucius]
isotig19392	15	0	6.58667e-05	Si:rp71-15k1.1 [Danio rerio]
isotig16733	15	0	6.58667e-05	prostaglandin D2 synthase, brain [Danio rerio]
isotig10522	15	0	6.58667e-05	PREDICTED: cAMP-specific 3&apos;,5&apos;-cyclic phosphodiesterase 4B, partial [Danio rerio]
isotig21769	15	0	6.58667e-05	hypothetical protein LOC393317 [Danio rerio]
isotig28739	15	0	6.58667e-05	calsequestrin 2 [Danio rerio]
isotig30419	16	0	3.58988e-05	CD97 antigen precursor [Salmo salar]
isotig23135	17	0	1.96607e-05	macrophage migration inhibitory factor [Danio rerio]
isotig12049	18	0	1.08176e-05	low-density lipoprotein receptor [Danio rerio]
isotig11246	18	0	1.08176e-05	liver-type fatty acid-binding protein [Ctenopharyngodon idella]
isotig16585	19	0	5.97842e-06	PREDICTED: hypothetical protein LOC100329316 [Danio rerio]
isotig18618	19	0	5.97842e-06	PREDICTED: e3 ubiquitin-protein ligase Itchy-like [Danio rerio]
isotig26165	19	0	5.97842e-06	plasminogen precursor [Danio rerio]
isotig11245	20	0	3.31812e-06	liver-type fatty acid-binding protein [Ctenopharyngodon idella]
isotig20006	21	0	1.84915e-06	ovary-specific C1q-like factor [Carassius gibelio]
isotig31558	21	0	1.84915e-06	hypothetical protein VOLCADRAFT_38238 [Volvox carteri f. nagariensis]
isotig08403	21	0	1.84915e-06	hypothetical protein LOC796447 [Danio rerio]
isotig15815	22	0	1.03458e-06	stanniocalcin [Catostomus commersoni]
isotig14434	22	0	1.03458e-06	PREDICTED: A disintegrin and metalloproteinase with thrombospondin motifs 1 [Danio rerio]
isotig16005	22	0	1.03458e-06	complement component C9 [Ctenopharyngodon idella]
isotig16659	23	0	5.81034e-07	kininogen 1 [Danio rerio]
isotig23646	24	0	3.27513e-07	PREDICTED: transmembrane protein 132E [Danio rerio]
isotig24109	25	0	1.85264e-07	Si:rp71-1g18.10 protein [Danio rerio]
isotig28122	25	0	1.85264e-07	alpha-2-macroglobulin [Ctenopharyngodon idella]
isotig14646	26	0	1.05157e-07	complement component C5-1 [Cyprinus carpio]
isotig27274	26	0	1.05157e-07	alpha-2-macroglobulin-2 [Cyprinus carpio]
isotig13775	29	0	1.96078e-08	envelope polyprotein [Nomascus gabriellae]
isotig14454	30	0	1.12712e-08	novel protein (zgc:56119) [Danio rerio]
isotig13193	31	0	6.49807e-09	lipoprotein lipase [Ctenopharyngodon idella]
isotig15996	31	0	6.49807e-09	apolipoprotein B, like [Danio rerio]
isotig24039	32	0	3.75696e-09	Zgc:112265 protein [Danio rerio]
isotig03816	37	0	2.52677e-10	Si:rp71-1g18.7 protein [Danio rerio]
isotig12696	37	0	2.52677e-10	Lman2lb protein [Danio rerio]
isotig27594	38	0	1.48389e-10	low-density lipoprotein receptor [Danio rerio]
isotig16575	39	0	8.73525e-11	novel protein similar to vertebrate palladin [Danio rerio]
isotig03817	40	0	5.15418e-11	hypothetical protein LOC559705 [Danio rerio]
isotig03818	40	0	5.15418e-11	hypothetical protein LOC559705 [Danio rerio]
isotig04527	42	0	1.80665e-11	PREDICTED: hypothetical protein LOC795729 [Danio rerio]
isotig04528	42	0	1.80665e-11	PREDICTED: hypothetical protein LOC795729 [Danio rerio]
isotig04525	43	0	1.07315e-11	PREDICTED: hypothetical protein LOC795729 [Danio rerio]
isotig04526	43	0	1.07315e-11	PREDICTED: hypothetical protein LOC795729 [Danio rerio]
isotig14709	46	0	2.27774e-12	F5 protein [Danio rerio]
isotig15219	48	0	8.18681e-13	si:ch1073-126c3.2 [Danio rerio]
isotig03815	48	0	8.18681e-13	novel protein similar to vertebrate gliacolin (C1Q) [Danio rerio]
isotig27745	51	0	1.78965e-13	unnamed protein product [Tetraodon nigroviridis]
isotig18544	57	0	8.97542e-15	apolipoprotein M [Hemibarbus mylodon]
isotig05063	57	0	8.97542e-15	alpha-2-macroglobulin-1 [Cyprinus carpio]
isotig16587	59	0	3.35462e-15	glutathione peroxidase 3 (plasma) [Danio rerio]
isotig10453	62	0	7.75639e-16	apolipoprotein B, like [Danio rerio]
isotig14272	69	0	2.68048e-17	PREDICTED: inter-alpha-trypsin inhibitor heavy chain H3-like [Danio rerio]
isotig10657	71	0	1.03779e-17	coagulation factor II [Oncorhynchus mykiss]
isotig13565	72	0	6.47029e-18	PREDICTED: hyaluronan binding protein 2 [Equus caballus]
isotig10656	72	0	6.47029e-18	coagulation factor II [Oncorhynchus mykiss]
isotig05062	78	0	3.90346e-19	alpha-2-macroglobulin-like [Danio rerio]
isotig05061	79	0	2.45514e-19	alpha-2-macroglobulin-like [Danio rerio]
isotig19829	80	0	1.54604e-19	branched chain alpha-ketoacid dehydrogenase kinase [Ctenopharyngodon idella]
isotig16775	83	0	3.88768e-20	alpha-2-macroglobulin-2 [Cyprinus carpio]
isotig10625	106	0	1.34851e-24	C1 inhibitor [Danio rerio]
isotig10624	110	0	2.37884e-25	C1 inhibitor [Danio rerio]
isotig10452	119	0	5.03812e-27	apolipoprotein B, like [Danio rerio]
isotig20206	185	0	1.43119e-38	retinol-binding protein 4 [Danio rerio]
isotig03262	185	0	1.43119e-38	alpha-2-macroglobulin-1 [Cyprinus carpio]
isotig04468	214	0	2.52318e-43	Fibrinogen alpha chain [Danio rerio]
isotig04469	214	0	2.52318e-43	Fibrinogen alpha chain [Danio rerio]
isotig03261	215	0	1.74132e-43	alpha-2-macroglobulin-1 [Cyprinus carpio]
isotig04466	219	0	3.96633e-44	Fibrinogen alpha chain [Danio rerio]
isotig04467	219	0	3.96633e-44	Fibrinogen alpha chain [Danio rerio]
isotig11174	241	0	1.29918e-47	PREDICTED: saxitoxin and tetrodotoxin-binding protein 2-like [Danio rerio]
isotig11175	241	0	1.29918e-47	PREDICTED: saxitoxin and tetrodotoxin-binding protein 2-like [Danio rerio]
isotig10785	254	0	1.23348e-49	alpha-2-HS-glycoprotein [Danio rerio]
isotig10784	265	0	2.50935e-51	fetuin long form [Cyprinus carpio]
isotig03260	278	0	2.64625e-53	alpha-2-macroglobulin-1 [Cyprinus carpio]
isotig03259	279	0	1.86862e-53	alpha-2-macroglobulin [Ctenopharyngodon idella]
isotig14057	292	0	2.08523e-55	warm temperature acclimation-related 65-kDa protein [Carassius auratus]
isotig10715	405	0	1.45035e-71	Serpina1 protein [Danio rerio]
isotig04488	698	0	8.37461e-109	transferrin variant C [Cyprinus carpio]
isotig04489	698	0	8.37461e-109	transferrin variant C [Cyprinus carpio]
isotig04486	732	0	8.15509e-113	transferrin variant C [Cyprinus carpio]
isotig04487	732	0	8.15509e-113	transferrin variant C [Cyprinus carpio]
isotig11121	809	0	1.02628e-121	14 kDa apolipoprotein [Hemibarbus mylodon]
isotig11122	809	0	1.02628e-121	14 kDa apolipoprotein [Hemibarbus mylodon]
isotig17171	6	1	0.0462545	tubulin gamma-1 chain [Danio rerio]
isotig29784	6	1	0.0462545	Trimethyllysine dioxygenase, mitochondrial precursor [Salmo salar]
isotig02113	6	1	0.0462545	transcobalamin 1 [Danio rerio]
isotig15571	6	1	0.0462545	RING finger protein unkempt homolog [Dicentrarchus labrax]
isotig27637	6	1	0.0462545	rho GTPase-activating protein 12 [Danio rerio]
isotig31184	6	1	0.0462545	putative hexokinase HKDC1 [Danio rerio]
isotig15292	6	1	0.0462545	PREDICTED: poly [ADP-ribose] polymerase 14-like [Danio rerio]
isotig28268	6	1	0.0462545	PREDICTED: pogo transposable element with ZNF domain-like [Danio rerio]
isotig23119	6	1	0.0462545	PREDICTED: p2Y purinoceptor 4-like [Danio rerio]
isotig11045	6	1	0.0462545	PREDICTED: hypothetical protein LOC100331068 [Danio rerio]
isotig20584	6	1	0.0462545	PREDICTED: hemogen-like isoform 1 [Danio rerio]
isotig11094	6	1	0.0462545	PREDICTED: growth arrest and DNA damage-inducible proteins-interacting protein 1 [Danio rerio]
isotig11095	6	1	0.0462545	PREDICTED: growth arrest and DNA damage-inducible proteins-interacting protein 1 [Danio rerio]
isotig25927	6	1	0.0462545	nuclear receptor subfamily 4, group A, member 2b [Danio rerio]
isotig12506	6	1	0.0462545	novel protein similar to human adaptor-related protein complex 1, gamma 2 subunit (AP1G2) [Danio rerio]
isotig25038	6	1	0.0462545	novel protein (zgc:55418) [Danio rerio]
isotig15829	6	1	0.0462545	mitochondrial import receptor subunit TOM22 homolog [Danio rerio]
isotig21864	6	1	0.0462545	Lpp protein [Danio rerio]
isotig28954	6	1	0.0462545	Iroquois homeobox protein 1, a [Danio rerio]
isotig22438	6	1	0.0462545	Im:7136220 protein [Danio rerio]
isotig17397	6	1	0.0462545	hypothetical protein PTSG_12019 [Salpingoeca sp. ATCC 50818]
isotig17692	6	1	0.0462545	hypothetical protein LOC552941 [Danio rerio]
isotig09693	6	1	0.0462545	hypothetical protein BRAFLDRAFT_93138 [Branchiostoma floridae]
isotig14365	6	1	0.0462545	glycerophosphodiester phosphodiesterase 1 [Danio rerio]
isotig19670	6	1	0.0462545	dexamethasone-induced Ras-related protein 1 [Danio rerio]
isotig05762	6	1	0.0462545	claudin k [Danio rerio]
isotig21731	6	1	0.0462545	aldehyde dehydrogenase 18A1 [Danio rerio]
isotig16464	7	1	0.0245335	YTH domain family protein 1 [Danio rerio]
isotig26936	7	1	0.0245335	unnamed protein product [Tetraodon nigroviridis]
isotig25800	7	1	0.0245335	transmembrane 9 superfamily member 1 [Danio rerio]
isotig05663	7	1	0.0245335	sortilin 1, like [Danio rerio]
isotig23064	7	1	0.0245335	serine/threonine-protein phosphatase 4 regulatory subunit 3B [Danio rerio]
isotig15609	7	1	0.0245335	RecName: Full=Solute carrier family 25 member 38-B
isotig13429	7	1	0.0245335	RecName: Full=RE1-silencing transcription factor; AltName: Full=Neural-restrictive silencer factor
isotig07982	7	1	0.0245335	receptor-interacting serine/threonine-protein kinase 4 [Danio rerio]
isotig14686	7	1	0.0245335	proline rich Gla (G-carboxyglutamic acid) 4 (transmembrane) [Danio rerio]
isotig12599	7	1	0.0245335	PREDICTED: zinc finger protein 91-like [Danio rerio]
isotig03728	7	1	0.0245335	PREDICTED: tissue-type plasminogen activator [Danio rerio]
isotig14889	7	1	0.0245335	PREDICTED: si:dkey-97i18.2 [Danio rerio]
isotig19306	7	1	0.0245335	PREDICTED: ras GTPase-activating protein 3 [Danio rerio]
isotig21649	7	1	0.0245335	PREDICTED: plakophilin-3-like [Danio rerio]
isotig26035	7	1	0.0245335	PREDICTED: myosin-Id [Danio rerio]
isotig16624	7	1	0.0245335	PREDICTED: hypothetical protein LOC100538319 [Danio rerio]
isotig16108	7	1	0.0245335	PREDICTED: GRAM domain-containing protein 4 [Danio rerio]
isotig16613	7	1	0.0245335	PREDICTED: FXYD domain-containing ion transport regulator 6 [Danio rerio]
isotig22342	7	1	0.0245335	PREDICTED: ER degradation-enhancing alpha-mannosidase-like 3-like [Danio rerio]
isotig23675	7	1	0.0245335	PREDICTED: carnitine O-palmitoyltransferase 1, liver isoform [Danio rerio]
isotig25883	7	1	0.0245335	phospholipase D1 [Danio rerio]
isotig19937	7	1	0.0245335	novel protein similar to mucosa associated lymphoid tissue lymphoma translocation gene 1 (malt1) [Danio rerio]
isotig07520	7	1	0.0245335	nedd4 family-interacting protein 1-like [Ictalurus punctatus]
isotig24817	7	1	0.0245335	myosin-Ic [Danio rerio]
isotig15733	7	1	0.0245335	luc7-like protein 3 isoform 2 [Danio rerio]
isotig14904	7	1	0.0245335	Ighmbp2l protein [Danio rerio]
isotig08574	7	1	0.0245335	hypothetical protein LOC564690 [Danio rerio]
isotig27557	7	1	0.0245335	E2F-associated phosphoprotein [Danio rerio]
isotig13681	7	1	0.0245335	DNA ligase 4 [Danio rerio]
isotig23877	7	1	0.0245335	Clptm1 protein [Danio rerio]
isotig29122	7	1	0.0245335	caspase recruitment domain protein [Cyprinus carpio]
isotig17298	7	1	0.0245335	brevican core protein [Danio rerio]
isotig15091	7	1	0.0245335	AP-3 complex subunit delta-1 [Danio rerio]
isotig07198	8	1	0.0129988	vacuolar fusion protein CCZ1 homolog [Danio rerio]
isotig18489	8	1	0.0129988	translocon-associated protein subunit delta [Danio rerio]
isotig05145	8	1	0.0129988	Si:dkey-218h11.4 protein [Danio rerio]
isotig17565	8	1	0.0129988	si:ch211-190h2.4 [Danio rerio]
isotig13685	8	1	0.0129988	rab11 family-interacting protein 4B [Danio rerio]
isotig25795	8	1	0.0129988	PREDICTED: serine/threonine-protein phosphatase 2A 55 kDa regulatory subunit B alpha isoform [Danio rerio]
isotig11044	8	1	0.0129988	PREDICTED: hypothetical protein LOC100331068 [Danio rerio]
isotig16468	8	1	0.0129988	PREDICTED: c-C motif chemokine 25-like [Danio rerio]
isotig06859	8	1	0.0129988	NOP56 [Danio rerio]
isotig29089	8	1	0.0129988	microfibrillar-associated protein 2 [Danio rerio]
isotig19242	8	1	0.0129988	lathosterol oxidase [Danio rerio]
isotig13456	8	1	0.0129988	cyclic AMP-responsive element-binding protein 3-like protein 2 [Danio rerio]
isotig16252	8	1	0.0129988	caspase 3 [Tanichthys albonubes]
isotig18107	8	1	0.0129988	carnitine palmitoyltransferase 1A [Danio rerio]
isotig13531	8	1	0.0129988	beta-mannosidase [Danio rerio]
isotig25283	9	1	0.00688652	Unknown (protein for MGC:174576) [Danio rerio]
isotig12357	9	1	0.00688652	synembryn-B [Danio rerio]
isotig10943	9	1	0.00688652	serine/threonine/tyrosine-interacting protein [Danio rerio]
isotig10944	9	1	0.00688652	serine/threonine/tyrosine-interacting protein [Danio rerio]
isotig19128	9	1	0.00688652	PREDICTED: vesicle transport protein SEC20 isoform 1 [Danio rerio]
isotig02910	9	1	0.00688652	PREDICTED: ubiquitin carboxyl-terminal hydrolase 2-like [Danio rerio]
isotig19270	9	1	0.00688652	PREDICTED: putative uncharacterized protein ENSP00000382790-like [Danio rerio]
isotig21969	9	1	0.00688652	PREDICTED: multimerin-2 [Danio rerio]
isotig20598	9	1	0.00688652	PREDICTED: leucine-rich repeat-containing protein 45 [Danio rerio]
isotig07812	9	1	0.00688652	GDP-mannose mannosylhydrolase (ISS) [Ostreococcus tauri]
isotig07813	9	1	0.00688652	GDP-mannose mannosylhydrolase (ISS) [Ostreococcus tauri]
isotig24808	9	1	0.00688652	F-box only protein 9 isoform 2 [Danio rerio]
isotig25014	9	1	0.00688652	DIS3-like exonuclease 1 [Danio rerio]
isotig08540	9	1	0.00688652	D-dopachrome decarboxylase [Danio rerio]
isotig17445	9	1	0.00688652	casein kinase 2 alpha 2a [Danio rerio]
isotig17346	9	1	0.00688652	annexin A13 [Danio rerio]
isotig11229	10	1	0.00365039	SJCHGC06400 protein [Schistosoma japonicum]
isotig24148	10	1	0.00365039	retinol-binding protein 2 [Danio rerio]
isotig22783	10	1	0.00365039	PREDICTED: ribonuclease T2 [Danio rerio]
isotig13562	10	1	0.00365039	PREDICTED: protein FAM193A, partial [Danio rerio]
isotig21489	10	1	0.00365039	met proto-oncogene (hepatocyte growth factor receptor) [Danio rerio]
isotig13091	10	1	0.00365039	DDB1- and CUL4-associated factor 13 [Danio rerio]
isotig24807	11	1	0.001937	PREDICTED: nuclear fragile X mental retardation-interacting protein 2 [Danio rerio]
isotig17470	11	1	0.001937	PREDICTED: hypothetical protein LOC565630 [Danio rerio]
isotig27610	11	1	0.001937	PREDICTED: hypothetical protein LOC556125 [Danio rerio]
isotig05801	11	1	0.001937	PREDICTED: hypothetical protein LOC100321723 [Danio rerio]
isotig05803	11	1	0.001937	PREDICTED: hypothetical protein LOC100321723 [Danio rerio]
isotig12505	11	1	0.001937	PREDICTED: DNA-binding protein SATB1-like [Danio rerio]
isotig10987	11	1	0.001937	NADH dehydrogenase [ubiquinone] 1 beta subcomplex subunit 7 [Danio rerio]
isotig20783	11	1	0.001937	hypothetical protein LOC564061 [Danio rerio]
isotig18423	11	1	0.001937	Ggnbp2 protein [Danio rerio]
isotig17244	11	1	0.001937	3-oxoacid CoA transferase 1b [Danio rerio]
isotig07466	12	1	0.00102925	uncharacterized protein c1orf43-like protein [Ictalurus punctatus]
isotig09617	12	1	0.00102925	Sfrs18 protein [Danio rerio]
isotig17247	12	1	0.00102925	peptidyl-prolyl cis-trans isomerase H isoform 1 [Danio rerio]
isotig10620	13	1	0.000547802	protein BAT5 [Danio rerio]
isotig10621	13	1	0.000547802	protein BAT5 [Danio rerio]
isotig07208	13	1	0.000547802	PREDICTED: extracellular matrix protein 1-like [Danio rerio]
isotig23577	14	1	0.000292088	ras homolog enriched in brain [Salmo salar]
isotig15838	14	1	0.000292088	protein LSM12 homolog A [Danio rerio]
isotig26123	14	1	0.000292088	PREDICTED: lysosomal-trafficking regulator [Danio rerio]
isotig08217	14	1	0.000292088	PREDICTED: complement C4-like [Danio rerio]
isotig14924	14	1	0.000292088	Myosin regulatory light chain interacting protein a [Danio rerio]
isotig07231	14	1	0.000292088	histone-lysine N-methyltransferase SETD7 [Danio rerio]
isotig07232	14	1	0.000292088	histone-lysine N-methyltransferase SETD7 [Danio rerio]
isotig20007	15	1	0.000156045	Si:rp71-1g18.11 protein [Danio rerio]
isotig17131	15	1	0.000156045	PREDICTED: probable histone-lysine N-methyltransferase ASH1L [Danio rerio]
isotig16137	16	1	8.35359e-05	putative delta-6 fatty acyl desaturase [Cyprinus carpio]
isotig16872	16	1	8.35359e-05	hypothetical protein LOC571548 [Danio rerio]
isotig12470	18	1	2.40927e-05	zinc finger, DHHC-type containing 6 [Danio rerio]
isotig14596	23	1	1.1182e-06	pantothenate kinase 3 [Danio rerio]
isotig14948	23	1	1.1182e-06	angiotensinogen [Danio rerio]
isotig17222	25	1	3.32512e-07	novel methyltransferase protein [Danio rerio]
isotig15183	32	1	5.0928e-09	RecName: Full=4-hydroxyphenylpyruvate dioxygenase; AltName: Full=4-hydroxyphenylpyruvic acid oxidase; Short=4HPPD; Short=HPD; Short=HPPDase
isotig14466	36	1	4.88475e-10	complement C4-1 [Cyprinus carpio]
isotig15468	36	1	4.88475e-10	complement C4-1 [Cyprinus carpio]
isotig01759	43	1	8.66197e-12	complement factor H-like 1 protein [Danio rerio]
isotig19963	49	1	2.91773e-13	novel protein similar to H.sapiens DNAL4, dynein, axonemal, light chain 4 (DNAL4, si:dkey-4c23.7) [Danio rerio]
isotig15253	50	1	1.66728e-13	Selenoprotein P, plasma, 1b [Danio rerio]
isotig13181	58	1	1.99867e-15	inter-alpha (globulin) inhibitor H4 [Danio rerio]
isotig08630	111	1	2.47219e-27	low-density lipoprotein receptor [Danio rerio]
isotig08629	115	1	3.47347e-28	low-density lipoprotein receptor [Danio rerio]
isotig21445	148	1	5.02488e-35	alpha-2-macroglobulin-1 [Cyprinus carpio]
isotig13573	184	1	3.7272e-42	fibrinogen gamma polypeptide [Hypophthalmichthys molitrix]
isotig12899	207	1	1.46831e-46	fibrinogen beta chain [Danio rerio]
isotig25388	302	1	8.85642e-64	apolipoprotein C-I [Hemibarbus mylodon]
isotig30401	8	2	0.0484395	Ras association (RalGDS/AF-6) domain family 2, like [Danio rerio]
isotig12073	8	2	0.0484395	pyridoxal-dependent decarboxylase domain-containing protein 1 [Danio rerio]
isotig08501	8	2	0.0484395	PREDICTED: upstream stimulatory factor 2-like, partial [Anolis carolinensis]
isotig25649	8	2	0.0484395	PREDICTED: myosin-Ic [Danio rerio]
isotig19186	8	2	0.0484395	PREDICTED: MHC class II transactivator [Danio rerio]
isotig20497	8	2	0.0484395	PREDICTED: hypothetical protein LOC327438 [Danio rerio]
isotig11695	8	2	0.0484395	PREDICTED: hypothetical protein LOC100536892 [Danio rerio]
isotig11729	8	2	0.0484395	PREDICTED: hypothetical protein LOC100330611 [Danio rerio]
isotig12214	8	2	0.0484395	PREDICTED: CD97 antigen-like [Danio rerio]
isotig13499	8	2	0.0484395	PREDICTED: anoctamin-5-like [Danio rerio]
isotig07442	8	2	0.0484395	novel protein similar to H.sapiens ASAH3, N-acylsphingosine amidohydrolase (alkaline ceramidase) 3 (ASAH3, zgc:110285) [Danio rerio]
isotig17422	8	2	0.0484395	MORC family CW-type zinc finger protein 3 [Danio rerio]
isotig21818	8	2	0.0484395	methyltransferase like 17 [Xenopus (Silurana) tropicalis]
isotig07987	8	2	0.0484395	lanosterol 14-alpha demethylase [Danio rerio]
isotig08573	8	2	0.0484395	hypothetical protein LOC564690 [Danio rerio]
isotig13529	8	2	0.0484395	hypothetical protein LOC541514 [Danio rerio]
isotig25539	8	2	0.0484395	hypothetical protein LOC393341 [Danio rerio]
isotig16589	8	2	0.0484395	GLE1 RNA export mediator-like [Danio rerio]
isotig06895	8	2	0.0484395	eukaryotic translation initiation factor 4, gamma 2a [Danio rerio]
isotig18483	8	2	0.0484395	dr1-associated corepressor [Salmo salar]
isotig29057	8	2	0.0484395	cold inducible RNA binding protein [Danio rerio]
isotig07441	8	2	0.0484395	alkaline ceramidase 1 [Danio rerio]
isotig15171	9	2	0.0275232	TRAF2-binding protein [Ctenopharyngodon idella]
isotig12434	9	2	0.0275232	Tmc6-related protein 1 [Takifugu rubripes]
isotig03536	9	2	0.0275232	PREDICTED: titin [Xenopus (Silurana) tropicalis]
isotig22259	9	2	0.0275232	PREDICTED: rho guanine nucleotide exchange factor 12 [Danio rerio]
isotig15537	9	2	0.0275232	PREDICTED: importin-4 [Danio rerio]
isotig21381	9	2	0.0275232	PREDICTED: condensin complex subunit 3 [Danio rerio]
isotig08596	9	2	0.0275232	novel protein similar to rabaptin, RAB GTPase binding effector protein 1 (RABEP1) [Danio rerio]
isotig17381	9	2	0.0275232	novel protein (zgc:152873) [Danio rerio]
isotig09209	9	2	0.0275232	LOC100000061 protein [Danio rerio]
isotig28129	9	2	0.0275232	leucine rich repeat containing 58 [Danio rerio]
isotig24392	9	2	0.0275232	ATP-binding cassette sub-family D member 3 [Danio rerio]
isotig17884	10	2	0.0155037	PREDICTED: tubulin-specific chaperone cofactor E-like protein-like [Danio rerio]
isotig23859	10	2	0.0155037	PREDICTED: tapasin-related protein-like [Danio rerio]
isotig21784	10	2	0.0155037	PREDICTED: sperm-associated antigen 5 [Danio rerio]
isotig28832	10	2	0.0155037	PREDICTED: similar to Musashi homolog 2 isoform 2 [Canis familiaris]
isotig06881	10	2	0.0155037	PREDICTED: si:dkey-266m15.6 [Danio rerio]
isotig12752	10	2	0.0155037	PREDICTED: rap1 GTPase-activating protein 2-like, partial [Sus scrofa]
isotig19577	10	2	0.0155037	PREDICTED: hypothetical protein LOC795005 [Danio rerio]
isotig25077	10	2	0.0155037	PREDICTED: equilibrative nucleoside transporter 1-like [Danio rerio]
isotig04553	10	2	0.0155037	PREDICTED: ectonucleoside triphosphate diphosphohydrolase 2 [Danio rerio]
isotig04555	10	2	0.0155037	PREDICTED: ectonucleoside triphosphate diphosphohydrolase 2 [Danio rerio]
isotig12708	10	2	0.0155037	hypothetical protein LOC767730 [Danio rerio]
isotig27802	10	2	0.0155037	hypothetical protein LOC436695 [Danio rerio]
isotig15417	10	2	0.0155037	glycerol-3-phosphate dehydrogenase 1a [Danio rerio]
isotig15701	10	2	0.0155037	glycerol-3-phosphate dehydrogenase 1 (soluble) [Danio rerio]
isotig10728	10	2	0.0155037	gamma-glutamyl hydrolase [Danio rerio]
isotig13086	10	2	0.0155037	endoplasmic reticulum-Golgi intermediate compartment protein 3 isoform 1 [Danio rerio]
isotig04554	10	2	0.0155037	ectonucleoside triphosphate diphosphohydrolase 2 a.1 [Danio rerio]
isotig04556	10	2	0.0155037	ectonucleoside triphosphate diphosphohydrolase 2 a.1 [Danio rerio]
isotig16021	10	2	0.0155037	dnaJ homolog subfamily A member 3, mitochondrial [Danio rerio]
isotig20109	10	2	0.0155037	C-X-C chemokine receptor type 5 [Danio rerio]
isotig22805	10	2	0.0155037	bromodomain-containing protein 2a [Danio rerio]
isotig11620	11	2	0.00867205	transglutaminase [Carassius auratus]
isotig16288	11	2	0.00867205	transcription initiation factor TFIID subunit 1 [Danio rerio]
isotig12794	11	2	0.00867205	PREDICTED: tensin-like C1 domain-containing phosphatase-like [Danio rerio]
isotig13231	11	2	0.00867205	PREDICTED: tensin-1 [Danio rerio]
isotig06880	11	2	0.00867205	PREDICTED: si:dkey-266m15.6 [Danio rerio]
isotig09538	11	2	0.00867205	PREDICTED: putative nuclease HARBI1-like [Danio rerio]
isotig14352	11	2	0.00867205	PREDICTED: nuclear pore membrane glycoprotein 210 [Danio rerio]
isotig12635	11	2	0.00867205	PREDICTED: hypothetical protein LOC562403 [Danio rerio]
isotig13680	11	2	0.00867205	NEDD8-conjugating enzyme Ubc12 [Salmo salar]
isotig24093	11	2	0.00867205	fatty acid binding protein 11a [Danio rerio]
isotig17608	12	2	0.00482304	thyroid cancer-1 [Danio rerio]
isotig07844	12	2	0.00482304	PREDICTED: hypothetical protein LOC100148399 [Danio rerio]
isotig23728	12	2	0.00482304	PREDICTED: calcium-independent phospholipase A2-gamma-like [Danio rerio]
isotig04905	12	2	0.00482304	mitogen-activated protein kinase kinase kinase kinase 5 [Danio rerio]
isotig20456	12	2	0.00482304	equilibrative nucleoside transporter 1 [Danio rerio]
isotig08539	12	2	0.00482304	D-dopachrome decarboxylase [Danio rerio]
isotig17502	13	2	0.00266982	rho GTPase-activating protein 28 [Danio rerio]
isotig23343	13	2	0.00266982	methylmalonic aciduria and homocystinuria type c-like protein [Ictalurus punctatus]
contig00420	13	2	0.00266982	GRB2-related adaptor protein 2b [Danio rerio]
isotig22976	13	2	0.00266982	ceruloplasmin [Danio rerio]
isotig23336	14	2	0.00147222	runt-related transcription factor 1 [Danio rerio]
isotig20557	14	2	0.00147222	PREDICTED: complement factor H-like [Danio rerio]
isotig08937	14	2	0.00147222	novel NACHT domain containing protein [Danio rerio]
isotig11043	14	2	0.00147222	hypothetical protein LOC405841 [Danio rerio]
isotig07627	14	2	0.00147222	ATP-binding cassette sub-family F member 1 [Danio rerio]
isotig07628	14	2	0.00147222	ATP-binding cassette sub-family F member 1 [Danio rerio]
isotig19150	15	2	0.000809261	SJCHGC03012 protein [Schistosoma japonicum]
isotig08889	17	2	0.000242748	Zgc:162945 [Danio rerio]
isotig00665	17	2	0.000242748	PREDICTED: LOW QUALITY PROTEIN: sterile alpha motif domain-containing protein 9-like [Nomascus leucogenys]
isotig07843	17	2	0.000242748	PREDICTED: hypothetical protein LOC100148399 [Danio rerio]
isotig09005	17	2	0.000242748	perforin [Ctenopharyngodon idella]
isotig20498	19	2	7.23143e-05	Zgc:162945 [Danio rerio]
isotig07694	19	2	7.23143e-05	lipase member H precursor [Danio rerio]
isotig05709	19	2	7.23143e-05	fibronectin 1b [Danio rerio]
isotig29939	22	2	1.16691e-05	dynamin-2 [Danio rerio]
isotig02739	35	2	4.28251e-09	ovary-specific C1q-like factor [Carassius auratus auratus]
isotig12917	52	2	1.60825e-13	LOC563048 protein [Danio rerio]
isotig12084	65	2	7.81809e-17	antithrombin-III [Danio rerio]
isotig15123	1172	2	1.81516e-216	apolipoprotein A-I-1 [Hemibarbus mylodon]
isotig08938	10	3	0.0446849	solute carrier family 47, member 1 [Danio rerio]
isotig07898	10	3	0.0446849	solute carrier family 22 member 2 [Danio rerio]
isotig10929	10	3	0.0446849	SHC-transforming protein 2 [Danio rerio]
isotig18146	10	3	0.0446849	selenocysteine lyase [Danio rerio]
isotig15608	10	3	0.0446849	SEC24 family, member D [Danio rerio]
isotig07827	10	3	0.0446849	RNA polymerase II subunit A C-terminal domain phosphatase SSU72 [Esox lucius]
isotig09027	10	3	0.0446849	PREDICTED: steryl-sulfatase-like [Danio rerio]
isotig04720	10	3	0.0446849	PREDICTED: similar to ORF2-encoded protein [Nasonia vitripennis]
isotig08395	10	3	0.0446849	PREDICTED: si:rp71-68n21.9 [Danio rerio]
isotig25414	10	3	0.0446849	PREDICTED: microtubule-actin cross-linking factor 1, isoforms 1/2/3/5 [Danio rerio]
isotig19549	10	3	0.0446849	PREDICTED: hypothetical protein LOC100334236 [Danio rerio]
isotig07056	10	3	0.0446849	novel protein similar to H.sapiens ZAP70, zeta-chain (TCR) associated protein kinase 70kDa (ZAP70, zgc:110383) [Danio rerio]
isotig11306	10	3	0.0446849	novel protein similar to H.sapiens SGPP1, sphingosine-1-phosphate phosphatase 1 (SGPP1) [Danio rerio]
isotig12614	10	3	0.0446849	Golgi reassembly-stacking protein 1 [Danio rerio]
isotig07606	10	3	0.0446849	catechol-O-methyltransferase a [Danio rerio]
isotig12175	10	3	0.0446849	ATP-binding cassette, sub-family B (MDR/TAP), member 3 [Danio rerio]
isotig19237	11	3	0.0265855	regulator of microtubule dynamics protein 1 [Danio rerio]
isotig19332	11	3	0.0265855	PREDICTED: trafficking protein particle complex subunit 9 [Danio rerio]
isotig15859	11	3	0.0265855	PREDICTED: eukaryotic translation initiation factor 4 gamma 1-like, partial [Danio rerio]
isotig17181	11	3	0.0265855	PCI domain-containing protein 2 [Danio rerio]
isotig28996	11	3	0.0265855	novel protein similar to vertebrate kinesin family member 1 family [Danio rerio]
isotig04904	11	3	0.0265855	mitogen-activated protein kinase kinase kinase kinase 5 [Danio rerio]
isotig05782	11	3	0.0265855	LOC565984 protein [Danio rerio]
isotig08027	11	3	0.0265855	hydroxymethylglutaryl-CoA lyase, mitochondrial [Danio rerio]
isotig12717	11	3	0.0265855	Ell2 protein [Danio rerio]
isotig05580	11	3	0.0265855	charged multivesicular body protein 5 [Danio rerio]
isotig05959	12	3	0.0156479	Zgc:162945 [Danio rerio]
isotig30572	12	3	0.0156479	PREDICTED: SLIT-ROBO Rho GTPase-activating protein 3 [Danio rerio]
isotig15625	12	3	0.0156479	PREDICTED: similar to pro-apoptotic Bcl-2 protein [Equus caballus]
isotig12663	12	3	0.0156479	PREDICTED: scavenger receptor class B, member 2 [Taeniopygia guttata]
isotig21324	12	3	0.0156479	novel protein similar to vertebrate galactosidase, beta 1 (GLB1) [Danio rerio]
isotig18455	12	3	0.0156479	NEDD4-like E3 ubiquitin-protein ligase WWP1 [Dicentrarchus labrax]
isotig12682	12	3	0.0156479	MLN64-like protein [Danio rerio]
isotig16987	12	3	0.0156479	hypothetical protein LOC798626 [Danio rerio]
isotig11964	12	3	0.0156479	hydroxymethylglutaryl-CoA synthase, cytoplasmic [Danio rerio]
isotig06914	13	3	0.00912535	ubiquitin-conjugating enzyme E2 K [Danio rerio]
isotig06915	13	3	0.00912535	ubiquitin-conjugating enzyme E2 K [Danio rerio]
isotig20682	13	3	0.00912535	transmembrane protease serine 2 [Danio rerio]
isotig07192	14	3	0.00527925	zgc:101704 [Danio rerio]
isotig07376	14	3	0.00527925	transposase [Pleuronectes platessa]
isotig15155	14	3	0.00527925	proteoglycan 4 [Danio rerio]
isotig12419	14	3	0.00527925	multiple coagulation factor deficiency 2 [Danio rerio]
isotig10945	14	3	0.00527925	Acyl carrier protein, mitochondrial precursor [Osmerus mordax]
isotig10946	14	3	0.00527925	Acyl carrier protein, mitochondrial precursor [Osmerus mordax]
isotig07375	15	3	0.00303305	transposase [Pleuronectes platessa]
isotig19735	15	3	0.00303305	PREDICTED: ras GTPase-activating-like protein IQGAP3-like [Xenopus (Silurana) tropicalis]
isotig08216	16	3	0.00173202	PREDICTED: complement C4-like [Danio rerio]
isotig25045	16	3	0.00173202	N-acetyltransferase 15 [Danio rerio]
isotig18736	16	3	0.00173202	complement C4-2 [Cyprinus carpio]
isotig18610	16	3	0.00173202	chemokine (C-C motif) ligand 20 [Danio rerio]
isotig27927	17	3	0.000983839	Idh1 protein [Danio rerio]
isotig15374	18	3	0.00055625	RecName: Full=AKT-interacting protein; AltName: Full=Fused toes protein homolog
isotig05113	18	3	0.00055625	PREDICTED: CD48 antigen [Danio rerio]
isotig03436	20	3	0.000175721	PREDICTED: hypothetical protein LOC497432 [Danio rerio]
isotig03435	20	3	0.000175721	hypothetical protein LOC100006053 [Danio rerio]
isotig02917	22	3	5.48018e-05	PREDICTED: butyrophilin subfamily 1 member A1-like [Danio rerio]
isotig17524	25	3	9.37267e-06	PREDICTED: hypothetical protein LOC796198 [Danio rerio]
isotig08449	25	3	9.37267e-06	coenzyme Q-binding protein COQ10 homolog, mitochondrial [Danio rerio]
isotig01813	85	3	2.66388e-21	complement C3 [Ctenopharyngodon idella]
isotig06176	12	4	0.0392245	trans-2,3-enoyl-CoA reductase [Danio rerio]
isotig06177	12	4	0.0392245	trans-2,3-enoyl-CoA reductase [Danio rerio]
isotig06839	12	4	0.0392245	PREDICTED: kinesin-1 heavy chain [Danio rerio]
isotig12093	12	4	0.0392245	mitogen-activated protein kinase 6 [Danio rerio]
isotig14653	12	4	0.0392245	hypothetical protein LOC569254 [Danio rerio]
isotig22084	12	4	0.0392245	claudin-1 [Danio rerio]
isotig14332	13	4	0.0241028	novel protein similar to vertebrate transmembrane protein 59 (TMEM59) [Danio rerio]
isotig21894	13	4	0.0241028	LOC100004228 protein [Danio rerio]
isotig28460	13	4	0.0241028	butyrophilin-like [Danio rerio]
isotig07191	14	4	0.014646	zgc:101704 [Danio rerio]
isotig09604	14	4	0.014646	PREDICTED: hypothetical protein LOC100321644 [Danio rerio]
isotig17646	14	4	0.014646	PREDICTED: hypothetical protein LOC100000596 [Danio rerio]
isotig07578	14	4	0.014646	PREDICTED: granzyme E [Danio rerio]
isotig20397	14	4	0.014646	guanine nucleotide-binding protein G(I)/G(S)/G(O) subunit gamma-5 [Danio rerio]
isotig06827	15	4	0.00881201	Prkci protein [Danio rerio]
isotig19734	15	4	0.00881201	leucine-rich alpha-2-glycoprotein [Ctenopharyngodon idella]
isotig22921	15	4	0.00881201	hypothetical protein LOC100034474 [Danio rerio]
isotig07339	15	4	0.00881201	cullin-1 [Danio rerio]
isotig06826	15	4	0.00881201	atypical protein kinase C lambda [Danio rerio]
isotig11756	16	4	0.00525544	Cysteine/serine-rich nuclear protein 1 [Dicentrarchus labrax]
isotig08888	17	4	0.00310981	Zgc:162945 [Danio rerio]
isotig14481	17	4	0.00310981	DNA topoisomerase 2-beta [Danio rerio]
isotig13457	18	4	0.00182728	probable signal peptidase complex subunit 2 [Danio rerio]
isotig16541	18	4	0.00182728	PREDICTED: sodium/glucose cotransporter 5-like [Danio rerio]
isotig15293	18	4	0.00182728	PREDICTED: e3 ubiquitin-protein ligase RNF182-like isoform 1 [Danio rerio]
isotig07209	18	4	0.00182728	pantothenate kinase 1 [Danio rerio]
isotig14710	18	4	0.00182728	novel protein similar to vertebrate metastasis suppressor 1 (MTSS1) [Danio rerio]
isotig08011	18	4	0.00182728	leukocyte receptor cluster member 8 homolog [Danio rerio]
isotig16393	18	4	0.00182728	hypothetical protein LOC100034474 [Danio rerio]
isotig06686	18	4	0.00182728	bcl-2-like protein 1 [Danio rerio]
isotig06687	18	4	0.00182728	bcl-2-like protein 1 [Danio rerio]
isotig07693	19	4	0.00106692	lipase member H precursor [Danio rerio]
isotig04762	21	4	0.000357778	single Ig IL-1-related receptor [Danio rerio]
isotig32067	29	4	3.86669e-06	PREDICTED: protein NLRC3-like [Danio rerio]
isotig21089	29	4	3.86669e-06	PREDICTED: hypothetical protein LOC556125 [Danio rerio]
isotig02736	43	4	1.02748e-09	ovary-specific C1q-like factor [Carassius gibelio]
isotig02735	43	4	1.02748e-09	ovary-specific C1q-like factor [Carassius auratus auratus]
isotig02738	43	4	1.02748e-09	ovary-specific C1q-like factor [Carassius auratus auratus]
isotig17558	45	4	3.12159e-10	Aars protein [Danio rerio]
isotig12193	83	4	4.26778e-20	ceruloplasmin [Danio rerio]
isotig12894	128	4	1.46241e-31	warm temperature acclimation protein 65 KDa-2 [Ictalurus punctatus]
isotig21998	0	5	0.0414317	Zgc:153813 protein [Danio rerio]
isotig16423	0	5	0.0414317	Zcchc17 protein [Danio rerio]
isotig11056	0	5	0.0414317	X-prolyl aminopeptidase (aminopeptidase P) 1, soluble [Danio rerio]
isotig11057	0	5	0.0414317	X-prolyl aminopeptidase (aminopeptidase P) 1, soluble [Danio rerio]
isotig15727	0	5	0.0414317	Wiskott-Aldrich syndrome, like [Danio rerio]
isotig24869	0	5	0.0414317	WD repeat-containing protein 74 [Danio rerio]
isotig23236	0	5	0.0414317	very low-density lipoprotein receptor [Danio rerio]
isotig09853	0	5	0.0414317	unnamed protein product [Tetraodon nigroviridis]
isotig09854	0	5	0.0414317	unnamed protein product [Tetraodon nigroviridis]
isotig15320	0	5	0.0414317	unnamed protein product [Tetraodon nigroviridis]
isotig19020	0	5	0.0414317	unnamed protein product [Tetraodon nigroviridis]
isotig26933	0	5	0.0414317	unnamed protein product [Tetraodon nigroviridis]
isotig31491	0	5	0.0414317	UDP-Gal:betaGlcNAc beta 1,4-galactosyltransferase, polypeptide 6 [Danio rerio]
isotig16998	0	5	0.0414317	ubiquitin-protein ligase E3A [Danio rerio]
isotig24596	0	5	0.0414317	ubiquitin-conjugating enzyme E2 Z [Danio rerio]
isotig13761	0	5	0.0414317	ubiquinol-cytochrome c reductase core protein II [Danio rerio]
isotig24373	0	5	0.0414317	transmembrane protein 2 [Danio rerio]
isotig16410	0	5	0.0414317	translation initiation factor eIF-2B precursor [Sciaenops ocellatus]
isotig10867	0	5	0.0414317	Transcription factor SOX-4 [Salmo salar]
isotig29920	0	5	0.0414317	Toll-like receptor II [Oncorhynchus mykiss]
isotig15790	0	5	0.0414317	TLC domain-containing protein 2 [Ictalurus punctatus]
isotig13177	0	5	0.0414317	Suppressor of Ty 6 homolog (S. cerevisiae) [Danio rerio]
isotig19187	0	5	0.0414317	stabilin-1 [Danio rerio]
isotig13470	0	5	0.0414317	SPARC [Danio rerio]
isotig11994	0	5	0.0414317	Si:ch211-154o6.7 protein [Danio rerio]
isotig24078	0	5	0.0414317	short coiled-coil protein A [Danio rerio]
isotig16831	0	5	0.0414317	serine/threonine-protein phosphatase 4 regulatory subunit 3B [Danio rerio]
isotig23676	0	5	0.0414317	serine palmitoyltransferase 1 [Danio rerio]
isotig18560	0	5	0.0414317	Sec24 family member C [Danio rerio]
isotig06128	0	5	0.0414317	SAM and SH3 domain containing 1 [Danio rerio]
isotig06129	0	5	0.0414317	SAM and SH3 domain containing 1 [Danio rerio]
isotig22115	0	5	0.0414317	SAM and SH3 domain containing 1 [Danio rerio]
isotig20788	0	5	0.0414317	Rufy2 protein [Danio rerio]
isotig29340	0	5	0.0414317	RNA methyltransferase-like protein 1B [Danio rerio]
isotig21776	0	5	0.0414317	RNA binding motif protein 39b [Danio rerio]
isotig22856	0	5	0.0414317	ring-box protein 2 [Ictalurus punctatus]
isotig18577	0	5	0.0414317	ring finger protein 113A [Danio rerio]
isotig20189	0	5	0.0414317	ribonuclease P protein subunit p40 [Danio rerio]
isotig19075	0	5	0.0414317	reverse transcriptase-like protein [Takifugu rubripes]
isotig23796	0	5	0.0414317	replication factor C subunit 2 [Danio rerio]
isotig17468	0	5	0.0414317	replication factor C subunit 1 [Danio rerio]
isotig15178	0	5	0.0414317	RecName: Full=Double-stranded RNA-binding protein Staufen homolog 2
isotig18526	0	5	0.0414317	RecName: Full=Cytosolic Fe-S cluster assembly factor narfl; AltName: Full=Nuclear prelamin A recognition factor-like protein
isotig23508	0	5	0.0414317	rab9 effector protein with kelch motifs [Danio rerio]
isotig15449	0	5	0.0414317	PRP39 pre-mRNA processing factor 39 homolog (yeast) [Danio rerio]
isotig23543	0	5	0.0414317	protein XRP2 [Danio rerio]
isotig21512	0	5	0.0414317	protein rogdi homolog [Danio rerio]
isotig25525	0	5	0.0414317	protein fat-free [Danio rerio]
isotig17036	0	5	0.0414317	probable ATP-dependent RNA helicase DDX46 [Danio rerio]
isotig15730	0	5	0.0414317	probable ATP-dependent RNA helicase DDX23 [Danio rerio]
isotig30085	0	5	0.0414317	PREDICTED: WD repeat- and FYVE domain-containing protein 4 [Danio rerio]
isotig21925	0	5	0.0414317	PREDICTED: Usher syndrome type-1C protein-binding protein 1-like [Danio rerio]
isotig14879	0	5	0.0414317	PREDICTED: UPF0668 protein C10orf76 homolog [Danio rerio]
isotig25728	0	5	0.0414317	PREDICTED: uncharacterized protein C10orf118-like [Danio rerio]
isotig23626	0	5	0.0414317	PREDICTED: tyrosine-protein kinase FRK-like isoform 4 [Danio rerio]
isotig18224	0	5	0.0414317	PREDICTED: trafficking kinesin-binding protein 2 [Danio rerio]
isotig30989	0	5	0.0414317	PREDICTED: structural maintenance of chromosomes flexible hinge domain-containing protein 1-like, partial [Danio rerio]
isotig26409	0	5	0.0414317	PREDICTED: snRNA-activating protein complex subunit 2-like [Danio rerio]
isotig30780	0	5	0.0414317	PREDICTED: similar to PYRIN-containing APAF1-like protein 5, partial [Ornithorhynchus anatinus]
isotig23597	0	5	0.0414317	PREDICTED: similar to ORF2-encoded protein, partial [Hydra magnipapillata]
isotig31094	0	5	0.0414317	PREDICTED: similar to endonuclease-reverse transcriptase [Strongylocentrotus purpuratus]
isotig15881	0	5	0.0414317	PREDICTED: si:ch211-218c6.8 [Danio rerio]
isotig28251	0	5	0.0414317	PREDICTED: SH3 domain-containing protein 19-like [Danio rerio]
isotig31621	0	5	0.0414317	PREDICTED: Schwann cell myelin protein-like [Danio rerio]
isotig24822	0	5	0.0414317	PREDICTED: ras-related protein Rab-39A-like [Danio rerio]
isotig17161	0	5	0.0414317	PREDICTED: ras-interacting protein 1-like [Danio rerio]
isotig19649	0	5	0.0414317	PREDICTED: pumilio domain-containing protein KIAA0020 homolog [Danio rerio]
isotig31033	0	5	0.0414317	PREDICTED: protein CLEC16A [Danio rerio]
isotig23555	0	5	0.0414317	PREDICTED: probable G-protein coupled receptor 112-like [Danio rerio]
isotig27336	0	5	0.0414317	PREDICTED: piggyBac transposable element-derived protein 5-like [Danio rerio]
isotig18194	0	5	0.0414317	PREDICTED: nucleolar protein 7 [Danio rerio]
isotig31175	0	5	0.0414317	PREDICTED: mitogen-activated protein kinase kinase kinase 1 [Danio rerio]
isotig27874	0	5	0.0414317	PREDICTED: MAP/microtubule affinity-regulating kinase 4-like [Danio rerio]
isotig04664	0	5	0.0414317	PREDICTED: interferon-inducible GTPase 5-like [Danio rerio]
isotig04661	0	5	0.0414317	PREDICTED: interferon-inducible GTPase 5 [Danio rerio]
isotig04662	0	5	0.0414317	PREDICTED: interferon-inducible GTPase 5 [Danio rerio]
isotig29749	0	5	0.0414317	PREDICTED: inositol hexakisphosphate and diphosphoinositol-pentakisphosphate kinase 1-like [Danio rerio]
isotig19578	0	5	0.0414317	PREDICTED: importin subunit alpha-7-like [Danio rerio]
isotig13105	0	5	0.0414317	PREDICTED: hypothetical protein LOC798813 [Danio rerio]
isotig20363	0	5	0.0414317	PREDICTED: hypothetical protein LOC797886 [Danio rerio]
isotig21953	0	5	0.0414317	PREDICTED: hypothetical protein LOC563788 [Danio rerio]
isotig25033	0	5	0.0414317	PREDICTED: hypothetical protein LOC559152 [Danio rerio]
isotig10099	0	5	0.0414317	PREDICTED: hypothetical protein LOC100534935 [Danio rerio]
isotig21638	0	5	0.0414317	PREDICTED: hypothetical protein LOC100334473 [Danio rerio]
isotig03625	0	5	0.0414317	PREDICTED: hypothetical protein LOC100331563 [Danio rerio]
isotig31601	0	5	0.0414317	PREDICTED: hypothetical protein LOC100330518 [Danio rerio]
isotig28759	0	5	0.0414317	PREDICTED: hypothetical protein LOC100006326 [Danio rerio]
isotig19302	0	5	0.0414317	PREDICTED: HEAT repeat-containing protein 7A-like [Danio rerio]
isotig08764	0	5	0.0414317	PREDICTED: GTPase IMAP family member 8 [Danio rerio]
isotig13400	0	5	0.0414317	PREDICTED: galectin-8 [Danio rerio]
isotig08447	0	5	0.0414317	PREDICTED: G protein-coupled receptor 64 isoform 8 [Oryctolagus cuniculus]
isotig08448	0	5	0.0414317	PREDICTED: G protein-coupled receptor 126 isoform 1 [Oryctolagus cuniculus]
isotig29650	0	5	0.0414317	PREDICTED: frizzled homolog 2 [Taeniopygia guttata]
isotig19447	0	5	0.0414317	PREDICTED: filamin-A [Danio rerio]
isotig13132	0	5	0.0414317	PREDICTED: filamin B, beta isoform 7 [Bos taurus]
isotig15893	0	5	0.0414317	PREDICTED: egl nine homolog 2-like [Danio rerio]
isotig14689	0	5	0.0414317	PREDICTED: DNA replication licensing factor MCM3-like [Danio rerio]
isotig20076	0	5	0.0414317	PREDICTED: disintegrin and metalloproteinase domain-containing protein 19 [Danio rerio]
isotig25081	0	5	0.0414317	PREDICTED: cytoplasmic polyadenylation element-binding protein 4-like, partial [Danio rerio]
isotig05109	0	5	0.0414317	PREDICTED: cytochrome P450 3A40-like [Danio rerio]
isotig11198	0	5	0.0414317	PREDICTED: cytidine deaminase-like [Danio rerio]
isotig11199	0	5	0.0414317	PREDICTED: cytidine deaminase-like [Danio rerio]
isotig15286	0	5	0.0414317	PREDICTED: c-Jun-amino-terminal kinase-interacting protein 3-like [Danio rerio]
isotig15465	0	5	0.0414317	PREDICTED: ATP-binding cassette sub-family B member 10, mitochondrial [Danio rerio]
isotig29232	0	5	0.0414317	PREDICTED: ankyrin repeat and zinc finger domain-containing protein 1 [Danio rerio]
isotig18767	0	5	0.0414317	PREDICTED: alpha-mannosidase 2C1-like [Danio rerio]
isotig28357	0	5	0.0414317	PREDICTED: a-kinase anchor protein 13 [Danio rerio]
isotig25961	0	5	0.0414317	PREDICTED: actin filament-associated protein 1-like 2-like [Danio rerio]
isotig21211	0	5	0.0414317	polycystin-2 [Danio rerio]
isotig29782	0	5	0.0414317	poly [ADP-ribose] polymerase 8 [Danio rerio]
isotig25175	0	5	0.0414317	poly [ADP-ribose] polymerase 16 [Danio rerio]
isotig29579	0	5	0.0414317	pol-like protein [Danio rerio]
isotig18433	0	5	0.0414317	Picalm protein [Danio rerio]
isotig15845	0	5	0.0414317	phosphorylated adapter RNA export protein [Danio rerio]
isotig23979	0	5	0.0414317	Phosphoglycerate mutase family member 5 [Danio rerio]
isotig19781	0	5	0.0414317	phosphatidylinositol-3,4,5-trisphosphate 5-phosphatase 2A [Danio rerio]
isotig28911	0	5	0.0414317	nucleotide-binding oligomerization domain-1 [Ctenopharyngodon idella]
isotig18543	0	5	0.0414317	nuclear pore complex protein Nup155 [Danio rerio]
isotig21632	0	5	0.0414317	novel protein similar to vertebrate LPS-responsive vesicle trafficking, beach and anchor containing (LRBA) [Danio rerio]
isotig26675	0	5	0.0414317	novel protein similar to vertebrate AT rich interactive domain containing protein family [Danio rerio]
isotig04663	0	5	0.0414317	novel protein similar to mouse T-cell specific GTPase (Tgtp) [Danio rerio]
isotig15176	0	5	0.0414317	novel protein similar to H.sapiens RRBP1, ribosome binding protein 1 homolog 180kDa (dog) (RRBP1, zgc:171356) [Danio rerio]
isotig21574	0	5	0.0414317	novel protein [Danio rerio]
isotig22003	0	5	0.0414317	novel protein (zgc:63531) [Danio rerio]
isotig08513	0	5	0.0414317	novel protein (wu:fk81d02) [Danio rerio]
isotig08514	0	5	0.0414317	novel protein (wu:fk81d02) [Danio rerio]
isotig30702	0	5	0.0414317	notch homolog 1b [Danio rerio]
isotig15448	0	5	0.0414317	nicotinamide mononucleotide adenylyltransferase 1 [Ictalurus punctatus]
isotig22552	0	5	0.0414317	nephronectin [Danio rerio]
isotig16579	0	5	0.0414317	NAD(P)H dehydrogenase [quinone] 1 isoform 2 [Danio rerio]
isotig08609	0	5	0.0414317	myotubularin-related protein 6 [Danio rerio]
isotig08610	0	5	0.0414317	myotubularin-related protein 6 [Danio rerio]
isotig14005	0	5	0.0414317	myelin protein zero-like protein 2 [Danio rerio]
isotig18236	0	5	0.0414317	mediator of RNA polymerase II transcription subunit 14 [Danio rerio]
isotig12110	0	5	0.0414317	mannosyl (alpha-1,3-)-glycoprotein beta-1,2-N-acetylglucosaminyltransferase [Danio rerio]
isotig10316	0	5	0.0414317	macrophage colony-stimulating factor receptor [Cyprinus carpio]
isotig30858	0	5	0.0414317	LOC571089 protein [Danio rerio]
isotig24518	0	5	0.0414317	lateral signaling target protein 2 homolog [Danio rerio]
isotig19958	0	5	0.0414317	KAISO-like zinc finger protein [Danio rerio]
contig20618	0	5	0.0414317	jun dimerization protein 2 [Danio rerio]
isotig22156	0	5	0.0414317	importin subunit alpha-6 [Danio rerio]
isotig12673	0	5	0.0414317	hypothetical protein LOC768172 [Danio rerio]
isotig24632	0	5	0.0414317	hypothetical protein LOC492800 [Danio rerio]
isotig30025	0	5	0.0414317	hypothetical protein LOC449801 [Danio rerio]
isotig20362	0	5	0.0414317	hypothetical protein LOC402967 [Danio rerio]
isotig29036	0	5	0.0414317	histone-lysine N-methyltransferase PRDM9 [Danio rerio]
isotig19055	0	5	0.0414317	Golgi pH regulator [Salmo salar]
isotig32155	0	5	0.0414317	fizzy-related protein homolog [Danio rerio]
isotig26295	0	5	0.0414317	elongator complex protein 3 [Danio rerio]
isotig22877	0	5	0.0414317	E3 ubiquitin-protein ligase MARCH8 isoform 1 [Danio rerio]
isotig16892	0	5	0.0414317	dolichyl-P-Man:Man(7)GlcNAc(2)-PP-dolichyl-alpha-1,6-mannosyltransferase [Danio rerio]
isotig18500	0	5	0.0414317	DNA replication licensing factor MCM6 [Danio rerio]
isotig22694	0	5	0.0414317	DNA ligase 3 [Danio rerio]
isotig13921	0	5	0.0414317	delta-like protein 4 [Danio rerio]
isotig31387	0	5	0.0414317	dehydrogenase/reductase (SDR family) member 3b [Danio rerio]
isotig17856	0	5	0.0414317	cyclin B [Cyprinus carpio]
isotig22414	0	5	0.0414317	conserved helix-loop-helix ubiquitous kinase [Danio rerio]
isotig27462	0	5	0.0414317	coiled-coil domain-containing protein 127 [Danio rerio]
isotig30346	0	5	0.0414317	cofactor required for Sp1 transcriptional activation, subunit 3 [Danio rerio]
isotig16234	0	5	0.0414317	cleavage and polyadenylation specificity factor subunit 2 [Danio rerio]
isotig20695	0	5	0.0414317	cleavage and polyadenylation specificity factor subunit 1 [Danio rerio]
isotig15450	0	5	0.0414317	choline transporter-like protein 4 [Danio rerio]
isotig07759	0	5	0.0414317	chaperone activity of bc1 complex-like, mitochondrial [Danio rerio]
isotig26284	0	5	0.0414317	cell division cycle 5-like protein [Danio rerio]
isotig24739	0	5	0.0414317	CDK5 regulatory subunit-associated protein 3 [Danio rerio]
isotig31897	0	5	0.0414317	C13orf22l protein [Danio rerio]
isotig10351	0	5	0.0414317	breast cancer anti-estrogen resistance 1 [Danio rerio]
isotig19084	0	5	0.0414317	beta-sarcoglycan [Danio rerio]
isotig29067	0	5	0.0414317	BCL2/adenovirus E1B interacting protein 3-like a [Danio rerio]
isotig20407	0	5	0.0414317	BCL2/adenovirus E1B 19kDa interacting protein 3b [Danio rerio]
isotig32018	0	5	0.0414317	autophagy-related protein 13 [Danio rerio]
isotig14725	0	5	0.0414317	Atrxl protein [Danio rerio]
isotig31423	0	5	0.0414317	ATP-binding cassette sub-family A member 1 [Danio rerio]
isotig25247	0	5	0.0414317	6-phosphofructo-2-kinase/fructose-2,6-biphosphatase 4 [Danio rerio]
isotig30083	0	5	0.0414317	6-phosphofructo-2-kinase/fructose-2,6-biphosphatase 3 [Danio rerio]
isotig08966	0	5	0.0414317	28S ribosomal protein S6, mitochondrial [Danio rerio]
isotig12104	14	5	0.0336151	uridine diphosphate glucose pyrophosphatase [Danio rerio]
isotig16724	14	5	0.0336151	FAD-dependent oxidoreductase domain-containing protein 1 [Danio rerio]
isotig12050	15	5	0.0211559	unconventional prefoldin RPB5 interactor [Danio rerio]
isotig29684	15	5	0.0211559	RAB35, member RAS oncogene family [Danio rerio]
isotig14597	15	5	0.0211559	PREDICTED: stonustoxin subunit beta-like [Danio rerio]
isotig12439	15	5	0.0211559	peroxisomal biogenesis factor 19 [Danio rerio]
isotig06844	15	5	0.0211559	Lancl1 protein [Danio rerio]
isotig06845	15	5	0.0211559	Lancl1 protein [Danio rerio]
isotig15406	15	5	0.0211559	anaphase-promoting complex subunit apc11 [Carassius auratus]
isotig14147	16	5	0.0131688	protein slowmo homolog 2 [Danio rerio]
isotig04713	16	5	0.0131688	Cytochrome b-c1 complex subunit 7 [Salmo salar]
isotig04714	16	5	0.0131688	Cytochrome b-c1 complex subunit 7 [Salmo salar]
isotig14810	17	5	0.00811622	Zgc:110083 protein [Danio rerio]
contig03627	17	5	0.00811622	PREDICTED: neoverrucotoxin subunit alpha-like [Danio rerio]
isotig03532	17	5	0.00811622	novel protein (zgc:113060) [Danio rerio]
isotig03533	17	5	0.00811622	novel protein (zgc:113060) [Danio rerio]
isotig03534	17	5	0.00811622	novel protein (zgc:113060) [Danio rerio]
isotig03535	17	5	0.00811622	novel protein (zgc:113060) [Danio rerio]
isotig10879	17	5	0.00811622	grpE protein homolog 1, mitochondrial [Danio rerio]
isotig01408	18	5	0.00495747	tyrosine-protein kinase Tec [Danio rerio]
isotig12169	18	5	0.00495747	calpain 2, (m/II) large subunit a [Danio rerio]
isotig19574	19	5	0.00300349	PREDICTED: im:7137886 [Danio rerio]
isotig11607	20	5	0.00180621	ADP-ribosylation factor-binding protein GGA1 [Danio rerio]
isotig12461	22	5	0.000640447	novel protein (id:ibd1340) [Danio rerio]
isotig13616	27	5	4.37291e-05	mitochondrial 2-oxoglutarate/malate carrier protein [Danio rerio]
isotig13909	27	5	4.37291e-05	LOC100149956 protein [Danio rerio]
isotig16327	27	5	4.37291e-05	homeo box B3a [Megalobrama amblycephala]
isotig02737	43	5	4.88221e-09	ovary-specific C1q-like factor [Carassius gibelio]
isotig14114	54	5	7.54543e-12	activator of 90 kDa heat shock protein ATPase homolog 1 [Danio rerio]
isotig06625	66	5	5.99863e-15	uncharacterized protein III [Epinephelus bruneus]
isotig18863	0	6	0.0212254	zinc finger protein 593 [Danio rerio]
isotig17708	0	6	0.0212254	zinc finger protein 592 [Danio rerio]
isotig09076	0	6	0.0212254	Zgc:86764 [Danio rerio]
isotig14825	0	6	0.0212254	Zgc:66414 [Danio rerio]
isotig24875	0	6	0.0212254	Zgc:158627 [Danio rerio]
isotig18672	0	6	0.0212254	WD repeat-containing protein 37 [Acromyrmex echinatior]
isotig16732	0	6	0.0212254	V-erb-b2 erythroblastic leukemia viral oncogene homolog 3b [Danio rerio]
isotig07763	0	6	0.0212254	unnamed protein product [Tetraodon nigroviridis]
isotig27560	0	6	0.0212254	Unc45a [Danio rerio]
isotig19750	0	6	0.0212254	transmembrane protein 111-like [Danio rerio]
isotig14354	0	6	0.0212254	transcription initiation factor TFIID subunit 1 [Danio rerio]
isotig15485	0	6	0.0212254	torsin family 1, member A-like [Danio rerio]
isotig19500	0	6	0.0212254	TNF receptor-associated factor 6 b [Cyprinus carpio]
isotig28386	0	6	0.0212254	telomere-associated protein RIF1 [Danio rerio]
isotig08126	0	6	0.0212254	sulfatase FP2a [Danio rerio]
isotig08127	0	6	0.0212254	sulfatase FP2a [Danio rerio]
isotig16429	0	6	0.0212254	SPEN-like protein [Ctenopharyngodon idella]
isotig29804	0	6	0.0212254	slit homolog 2 protein [Danio rerio]
isotig11152	0	6	0.0212254	selenoprotein J [Danio rerio]
isotig11153	0	6	0.0212254	selenoprotein J [Danio rerio]
isotig15413	0	6	0.0212254	retinoic acid-inducible gene-I [Cyprinidae sp. EPC]
isotig09548	0	6	0.0212254	RecName: Full=Nibrin; AltName: Full=Nijmegen breakage syndrome protein 1 homolog
isotig10315	0	6	0.0212254	receptor tyrosine kinase Fms [Danio nigrofasciatus]
isotig20384	0	6	0.0212254	Psmb6 protein [Danio rerio]
isotig18160	0	6	0.0212254	protein-tyrosine phosphatase mitochondrial 1 [Danio rerio]
isotig07478	0	6	0.0212254	protein zyg-11 homolog [Danio rerio]
isotig30173	0	6	0.0212254	protein tyrosine phosphatase, non-receptor type 23, a [Danio rerio]
contig00008	0	6	0.0212254	protein N-terminal glutamine amidohydrolase [Danio rerio]
isotig24978	0	6	0.0212254	PREDICTED: uncharacterized protein CXorf21-like [Danio rerio]
isotig25870	0	6	0.0212254	PREDICTED: ubiquitin-conjugating enzyme E2C-binding protein [Danio rerio]
isotig26515	0	6	0.0212254	PREDICTED: tRNA-dihydrouridine synthase 2-like [Danio rerio]
isotig17365	0	6	0.0212254	PREDICTED: translational activator GCN1 [Danio rerio]
isotig19319	0	6	0.0212254	PREDICTED: transformation/transcription domain-associated protein [Danio rerio]
isotig31766	0	6	0.0212254	PREDICTED: sucrase-isomaltase, intestinal-like, partial [Danio rerio]
isotig26859	0	6	0.0212254	PREDICTED: similar to reverse transcriptase-like protein [Hydra magnipapillata]
isotig17841	0	6	0.0212254	PREDICTED: similar to KIAA2005 protein [Gallus gallus]
isotig18606	0	6	0.0212254	PREDICTED: similar to cryopyrin isoform b isoform 4 [Canis familiaris]
isotig31355	0	6	0.0212254	PREDICTED: RING finger protein 213-like [Danio rerio]
isotig20171	0	6	0.0212254	PREDICTED: receptor-transporting protein 2 [Danio rerio]
isotig08017	0	6	0.0212254	PREDICTED: ras-associating and dilute domain-containing protein-like [Danio rerio]
isotig26654	0	6	0.0212254	PREDICTED: protocadherin-12 [Danio rerio]
isotig24610	0	6	0.0212254	PREDICTED: protein fuzzy homolog [Danio rerio]
isotig21537	0	6	0.0212254	PREDICTED: probable E3 ubiquitin-protein ligase HERC4 [Danio rerio]
isotig15758	0	6	0.0212254	PREDICTED: phosphorylase b kinase regulatory subunit beta-like [Danio rerio]
isotig16966	0	6	0.0212254	PREDICTED: phosphomannomutase 1-like [Anolis carolinensis]
isotig21030	0	6	0.0212254	PREDICTED: paired box protein Pax-3 [Danio rerio]
isotig22320	0	6	0.0212254	PREDICTED: mitogen-activated protein kinase kinase kinase 3 [Danio rerio]
isotig24815	0	6	0.0212254	PREDICTED: lysine-specific demethylase 3B [Danio rerio]
isotig12067	0	6	0.0212254	PREDICTED: l-amino-acid oxidase [Danio rerio]
isotig29573	0	6	0.0212254	PREDICTED: inositol hexakisphosphate and diphosphoinositol-pentakisphosphate kinase 2 [Danio rerio]
isotig11352	0	6	0.0212254	PREDICTED: hypothetical protein LOC797198 [Danio rerio]
isotig17254	0	6	0.0212254	PREDICTED: hypothetical protein LOC563788 [Danio rerio]
isotig29781	0	6	0.0212254	PREDICTED: hypothetical protein LOC560882 [Danio rerio]
isotig20541	0	6	0.0212254	PREDICTED: hormone-sensitive lipase-like [Danio rerio]
isotig08586	0	6	0.0212254	PREDICTED: GTPase IMAP family member 8-like [Danio rerio]
isotig08763	0	6	0.0212254	PREDICTED: GTPase IMAP family member 8 [Danio rerio]
isotig21883	0	6	0.0212254	PREDICTED: e3 ubiquitin-protein ligase UBR2 [Danio rerio]
isotig18590	0	6	0.0212254	PREDICTED: diaphanous homolog 1 (Drosophila) [Equus caballus]
isotig03983	0	6	0.0212254	PREDICTED: cytosolic 5&apos;-nucleotidase 1B [Danio rerio]
isotig03985	0	6	0.0212254	PREDICTED: cytosolic 5&apos;-nucleotidase 1B [Danio rerio]
isotig30536	0	6	0.0212254	PREDICTED: CG10307-like [Saccoglossus kowalevskii]
isotig20338	0	6	0.0212254	PREDICTED: aspartyl/asparaginyl beta-hydroxylase [Danio rerio]
isotig29025	0	6	0.0212254	PREDICTED: ankyrin repeat and death domain-containing protein 1A-like [Danio rerio]
isotig16800	0	6	0.0212254	pol-like protein [Ciona intestinalis]
isotig15877	0	6	0.0212254	PAB-dependent poly(A)-specific ribonuclease subunit 3 [Danio rerio]
isotig19747	0	6	0.0212254	nucleoporin 205 [Danio rerio]
isotig10958	0	6	0.0212254	Nuclear protein Hcc-1 [Salmo salar]
isotig19740	0	6	0.0212254	novel protein similar to vertebrate spectrin repeat containing, nuclear envelope 1 (SYNE1) [Danio rerio]
isotig03202	0	6	0.0212254	novel protein similar to vertebrate ring finger and WD repeat domain 2 (RFWD2, zgc:163067) [Danio rerio]
isotig03203	0	6	0.0212254	novel protein similar to vertebrate ring finger and WD repeat domain 2 (RFWD2, zgc:163067) [Danio rerio]
isotig17334	0	6	0.0212254	novel protein similar to vertebrate microtubule-associated protein 1B (MAP1B) [Danio rerio]
isotig26098	0	6	0.0212254	novel protein similar to non-vertebrate chitin synthase protein [Danio rerio]
isotig18602	0	6	0.0212254	novel protein similar to LUC7-like (S. cerevisiae) (luc7l, zgc:158803) [Danio rerio]
isotig16563	0	6	0.0212254	novel protein (zgc:91819) [Danio rerio]
isotig09547	0	6	0.0212254	nibrin [Danio rerio]
isotig22242	0	6	0.0212254	neural Wiskott-Aldrich syndrome protein [Danio rerio]
isotig28373	0	6	0.0212254	MUC19 [Mus musculus]
isotig08904	0	6	0.0212254	mediator of RNA polymerase II transcription subunit 25 [Danio rerio]
isotig08905	0	6	0.0212254	mediator of RNA polymerase II transcription subunit 25 [Danio rerio]
isotig19470	0	6	0.0212254	LOC557109 protein [Danio rerio]
isotig06976	0	6	0.0212254	lipase maturation factor 2 [Danio rerio]
isotig06977	0	6	0.0212254	lipase maturation factor 2 [Danio rerio]
isotig20858	0	6	0.0212254	light ear protein [Danio rerio]
isotig18137	0	6	0.0212254	leucine zipper and ICAT homologous domain protein [Danio rerio]
isotig29567	0	6	0.0212254	kita [Danio rerio]
isotig28974	0	6	0.0212254	kinesin-like protein KIF18A [Danio rerio]
isotig17010	0	6	0.0212254	kinectin [Danio rerio]
isotig17784	0	6	0.0212254	interleukin 1, beta [Danio rerio]
isotig17706	0	6	0.0212254	interferon-induced helicase C domain-containing protein 1 [Ctenopharyngodon idella]
isotig26206	0	6	0.0212254	integrator complex subunit 3 [Danio rerio]
isotig22344	0	6	0.0212254	hypothetical protein LOC565061 [Danio rerio]
isotig08645	0	6	0.0212254	hypothetical protein LOC503765 [Danio rerio]
isotig24511	0	6	0.0212254	hypothetical protein LOC492689 [Danio rerio]
isotig25833	0	6	0.0212254	host cell factor C1b [Danio rerio]
isotig28041	0	6	0.0212254	Hcfc1a protein [Danio rerio]
isotig23616	0	6	0.0212254	GTP-binding protein ARD-1 [Danio rerio]
isotig30580	0	6	0.0212254	G-protein coupled purinergic receptor P2Y10 [Danio rerio]
isotig27229	0	6	0.0212254	glutaryl-Coenzyme A dehydrogenase, like [Danio rerio]
isotig29507	0	6	0.0212254	glutamyl-tRNA(Gln) amidotransferase subunit B, mitochondrial-like [Danio rerio]
isotig16720	0	6	0.0212254	FIP1 like 1 (S. cerevisiae), isoform CRA_b [Mus musculus]
isotig14310	0	6	0.0212254	eukaryotic translation initiation factor 2-alpha kinase 3 [Danio rerio]
isotig13832	0	6	0.0212254	ETS homologous factor [Danio rerio]
isotig20569	0	6	0.0212254	Ehmt1a protein [Danio rerio]
isotig15987	0	6	0.0212254	DNA topoisomerase 2-beta [Danio rerio]
isotig05041	0	6	0.0212254	connector enhancer of kinase suppressor of ras 1 [Danio rerio]
isotig21747	0	6	0.0212254	coiled-coil domain-containing protein 146 [Danio rerio]
isotig07762	0	6	0.0212254	Btbd2 protein [Danio rerio]
isotig25171	0	6	0.0212254	androgen receptor [Pimephales promelas]
isotig26204	0	6	0.0212254	androgen receptor [Pimephales promelas]
isotig15271	0	6	0.0212254	aminoacyl tRNA synthase complex-interacting multifunctional protein 2 [Danio rerio]
isotig25713	0	6	0.0212254	A-kinase anchor protein 8-like [Danio rerio]
isotig23411	0	6	0.0212254	agmatinase, mitochondrial [Danio rerio]
isotig16981	0	6	0.0212254	3-hydroxybutyrate dehydrogenase type 2 [Danio rerio]
isotig17700	1	6	0.0485209	zinc finger protein 292 [Danio rerio]
isotig18395	1	6	0.0485209	Zgc:153813 protein [Danio rerio]
isotig15187	1	6	0.0485209	wu:fc69a03 [Danio rerio]
isotig09196	1	6	0.0485209	unnamed protein product [Tetraodon nigroviridis]
isotig09092	1	6	0.0485209	Unknown (protein for MGC:171528) [Danio rerio]
isotig09093	1	6	0.0485209	Unknown (protein for MGC:171528) [Danio rerio]
isotig18752	1	6	0.0485209	Ugdh protein [Danio rerio]
isotig09406	1	6	0.0485209	U2-associated SR140 protein-like [Danio rerio]
isotig17075	1	6	0.0485209	tumor protein p53-inducible nuclear protein 1 [Danio rerio]
isotig15188	1	6	0.0485209	tumor necrosis factor ligand superfamily member 12 [Danio rerio]
isotig22206	1	6	0.0485209	transmembrane protein 199 [Danio rerio]
isotig19950	1	6	0.0485209	translocase of outer mitochondrial membrane 5 homolog [Danio rerio]
isotig09733	1	6	0.0485209	Thioredoxin domain-containing protein 17 [Esox lucius]
isotig21820	1	6	0.0485209	splicing factor 3A subunit 2 [Danio rerio]
isotig21056	1	6	0.0485209	solute carrier family 22 member 18 [Danio rerio]
isotig28776	1	6	0.0485209	sodium/myo-inositol cotransporter 2 [Danio rerio]
isotig08182	1	6	0.0485209	small subunit of serine palmitoyltransferase A [Danio rerio]
isotig10443	1	6	0.0485209	serine/threonine-protein kinase receptor R3 [Danio rerio]
isotig15401	1	6	0.0485209	Sb:cb157 protein [Danio rerio]
isotig20412	1	6	0.0485209	RING finger protein 121 [Salmo salar]
isotig27348	1	6	0.0485209	reverse transcriptase-like protein [Takifugu rubripes]
isotig27902	1	6	0.0485209	reverse transcriptase-like protein [Takifugu rubripes]
isotig08423	1	6	0.0485209	required for meiotic nuclear division protein 1 homolog [Danio rerio]
isotig18452	1	6	0.0485209	RecName: Full=Selenoprotein N; Short=SePN; Short=SelN
isotig19355	1	6	0.0485209	RecName: Full=Proteasome subunit beta type-1-B; AltName: Full=20S proteasome beta-6 subunit B; Short=B6-B
isotig12919	1	6	0.0485209	putative ferric-chelate reductase 1 [Danio rerio]
isotig18809	1	6	0.0485209	protein lin-37 homolog [Danio rerio]
isotig14693	1	6	0.0485209	PREDICTED: wolframin [Danio rerio]
isotig22317	1	6	0.0485209	PREDICTED: ubiquitin carboxyl-terminal hydrolase 32-like [Danio rerio]
isotig30384	1	6	0.0485209	PREDICTED: titin [Danio rerio]
isotig18624	1	6	0.0485209	PREDICTED: sacsin [Danio rerio]
isotig23570	1	6	0.0485209	PREDICTED: putative uncharacterized transposon-derived protein ZK1236.4-like [Xenopus (Silurana) tropicalis]
isotig17735	1	6	0.0485209	PREDICTED: protein transport protein Sec24C [Danio rerio]
isotig12977	1	6	0.0485209	PREDICTED: protein BTG3-like [Danio rerio]
isotig14629	1	6	0.0485209	PREDICTED: nuclear receptor-interacting protein 1 [Danio rerio]
isotig16606	1	6	0.0485209	PREDICTED: myosin-IXb-like [Danio rerio]
isotig24914	1	6	0.0485209	PREDICTED: mucin-2-like [Danio rerio]
isotig13464	1	6	0.0485209	PREDICTED: menin-like [Danio rerio]
isotig14430	1	6	0.0485209	PREDICTED: LETM1 domain-containing protein LETM2, mitochondrial [Danio rerio]
isotig30961	1	6	0.0485209	PREDICTED: IQ domain-containing protein G [Danio rerio]
isotig16665	1	6	0.0485209	PREDICTED: hypothetical protein LOC566882 [Danio rerio]
isotig16970	1	6	0.0485209	PREDICTED: hypothetical protein LOC368429 [Danio rerio]
isotig18812	1	6	0.0485209	PREDICTED: hypothetical protein LOC100330855 [Danio rerio]
isotig17675	1	6	0.0485209	PREDICTED: hypothetical protein LOC100170826 [Danio rerio]
isotig09143	1	6	0.0485209	PREDICTED: hypothetical protein LOC100005038 [Danio rerio]
isotig30270	1	6	0.0485209	PREDICTED: hypothetical protein LOC100001617 [Danio rerio]
isotig23612	1	6	0.0485209	PREDICTED: hypothetical protein [Gallus gallus]
isotig17665	1	6	0.0485209	PREDICTED: guanine nucleotide-binding protein G(z) subunit alpha [Danio rerio]
isotig20717	1	6	0.0485209	PREDICTED: epithelial chloride channel protein [Xenopus (Silurana) tropicalis]
isotig15709	1	6	0.0485209	PREDICTED: cornifelin homolog B [Danio rerio]
isotig09947	1	6	0.0485209	PREDICTED: CD209 antigen-like, partial [Danio rerio]
isotig15372	1	6	0.0485209	PREDICTED: autism susceptibility gene 2 protein-like [Danio rerio]
isotig29884	1	6	0.0485209	PREDICTED: attractin-like 1 [Danio rerio]
isotig13846	1	6	0.0485209	PREDICTED: arf-GAP with Rho-GAP domain, ANK repeat and PH domain-containing protein 1-like isoform 1 [Macaca mulatta]
isotig18393	1	6	0.0485209	PREDICTED: a-kinase anchor protein 13 [Danio rerio]
isotig18156	1	6	0.0485209	polymerase (RNA) II (DNA directed) polypeptide H, isoform CRA_b [Mus musculus]
isotig13691	1	6	0.0485209	polyadenylate-binding protein-interacting protein 1 [Danio rerio]
isotig17246	1	6	0.0485209	pl10 [Danio rerio]
isotig13543	1	6	0.0485209	phosphatidylinositol-4,5-bisphosphate 3-kinase catalytic subunit gamma isoform [Danio rerio]
isotig13706	1	6	0.0485209	paxillin [Danio rerio]
isotig03890	1	6	0.0485209	novel protein similar to vertebrate RAB25, member RAS oncogene family (RAB25) [Danio rerio]
isotig03891	1	6	0.0485209	novel protein similar to vertebrate RAB25, member RAS oncogene family (RAB25) [Danio rerio]
isotig03892	1	6	0.0485209	novel protein similar to vertebrate RAB25, member RAS oncogene family (RAB25) [Danio rerio]
isotig17197	1	6	0.0485209	novel protein similar to vertebrate plexin B1 (PLXNB1) [Danio rerio]
isotig13441	1	6	0.0485209	novel protein similar to vertebrate MYST histone acetyltransferase (monocytic leukemia) 4 (MYST4) [Danio rerio]
isotig28582	1	6	0.0485209	novel protein similar to vertebrate low density lipoprotein-related protein 2 (LRP2) [Danio rerio]
isotig20787	1	6	0.0485209	novel protein similar to vertebrate IMP (inosine monophosphate) dehydrogenase 1 (IMPDH1) [Danio rerio]
isotig21322	1	6	0.0485209	novel protein similar to vertebrate human immunodeficiency virus type I enhancer binding protein 1 (HIVEP1) [Danio rerio]
isotig09064	1	6	0.0485209	novel protein [Danio rerio]
isotig14673	1	6	0.0485209	novel protein [Danio rerio]
isotig25075	1	6	0.0485209	novel protein [Danio rerio]
isotig13728	1	6	0.0485209	novel protein (zgc:63886) [Danio rerio]
isotig22507	1	6	0.0485209	myocyte-specific enhancer factor 2C [Danio rerio]
isotig19272	1	6	0.0485209	mitochondrial dicarboxylate carrier [Danio rerio]
isotig25735	1	6	0.0485209	Mef2d protein [Danio rerio]
isotig08184	1	6	0.0485209	Mediator of cell motility 1 [Danio rerio]
isotig08185	1	6	0.0485209	Mediator of cell motility 1 [Danio rerio]
isotig26931	1	6	0.0485209	low-density lipoprotein receptor-related protein 2 [Danio rerio]
isotig14274	1	6	0.0485209	LOC402861 protein [Danio rerio]
isotig15715	1	6	0.0485209	LOC100158565 protein [Xenopus (Silurana) tropicalis]
isotig12716	1	6	0.0485209	isoleucyl-tRNA synthetase, cytoplasmic [Danio rerio]
isotig10308	1	6	0.0485209	immunoglobulin Z heavy chain [Ctenopharyngodon idella]
isotig17539	1	6	0.0485209	Immunoglobulin superfamily member 6 precursor [Salmo salar]
isotig15191	1	6	0.0485209	hypothetical protein LOC561607 [Danio rerio]
isotig07024	1	6	0.0485209	hypothetical protein LOC436832 [Danio rerio]
isotig07025	1	6	0.0485209	hypothetical protein LOC436832 [Danio rerio]
isotig16726	1	6	0.0485209	hypothetical protein LOC323645 [Danio rerio]
isotig23931	1	6	0.0485209	hypothetical protein LOC100007793 [Danio rerio]
isotig16116	1	6	0.0485209	homeo box B3a [Megalobrama amblycephala]
isotig16597	1	6	0.0485209	histone deacetylase 3 [Danio rerio]
isotig08084	1	6	0.0485209	hepatitis A virus cellular receptor 1 homolog [Danio rerio]
isotig18439	1	6	0.0485209	H/ACA ribonucleoprotein complex subunit 1 [Danio rerio]
isotig19060	1	6	0.0485209	glutaredoxin-related protein 5, mitochondrial [Danio rerio]
isotig12766	1	6	0.0485209	glutamine synthetase 1 [Danio rerio]
isotig08203	1	6	0.0485209	far upstream element-binding protein 2 [Danio rerio]
isotig18300	1	6	0.0485209	eukaryotic translation initiation factor 3 subunit K [Danio rerio]
isotig14456	1	6	0.0485209	dedicator of cytokinesis protein 1 [Danio rerio]
isotig16746	1	6	0.0485209	DEAD (Asp-Glu-Ala-Asp) box polypeptide 3 [Danio rerio]
isotig28592	1	6	0.0485209	DCN1-like protein 2 [Danio rerio]
isotig18556	1	6	0.0485209	cytosol aminopeptidase [Danio rerio]
isotig14641	1	6	0.0485209	cytoplasmic dynein 1 heavy chain 1 [Danio rerio]
isotig14045	1	6	0.0485209	cytokine-inducible Src homology 2 [Ctenopharyngodon idella]
isotig17728	1	6	0.0485209	chromatin assembly factor 1 subunit A [Danio rerio]
isotig22707	1	6	0.0485209	carnitine O-acetyltransferase [Danio rerio]
isotig23394	1	6	0.0485209	B-cell CLL/lymphoma 6a, genome duplicate b [Danio rerio]
isotig10541	1	6	0.0485209	ATP-binding cassette sub-family E member 1 isoform 1 [Danio rerio]
isotig31435	1	6	0.0485209	abl interactor 2 [Danio rerio]
isotig20453	1	6	0.0485209	28S ribosomal protein S25, mitochondrial [Danio rerio]
isotig10404	15	6	0.0438412	sodium bicarbonate cotransporter [Tribolodon hakonensis]
isotig12996	15	6	0.0438412	RecName: Full=Hepatoma-derived growth factor-related protein 2; Short=HRP-2
isotig07535	15	6	0.0438412	PREDICTED: similar to transposase domain-containing protein [Hydra magnipapillata]
isotig07536	15	6	0.0438412	PREDICTED: similar to transposase domain-containing protein [Hydra magnipapillata]
isotig22570	15	6	0.0438412	PREDICTED: similar to ORF2-encoded protein [Strongylocentrotus purpuratus]
isotig16102	15	6	0.0438412	PREDICTED: hypothetical protein LOC100331153 [Danio rerio]
isotig12112	15	6	0.0438412	cullin 1-like [Danio rerio]
isotig06429	15	6	0.0438412	aspartate beta-hydroxylase [Danio rerio]
contig00229	16	6	0.0284344	tyrosine-protein phosphatase non-receptor type 11 [Danio rerio]
isotig17149	16	6	0.0284344	selenoprotein T1b precursor [Danio rerio]
isotig28307	16	6	0.0284344	hepatocyte nuclear factor 1-alpha [Danio rerio]
isotig07624	17	6	0.0182287	protein DEK [Danio rerio]
isotig06334	17	6	0.0182287	protein C [Danio rerio]
isotig06335	17	6	0.0182287	protein C [Danio rerio]
isotig15713	17	6	0.0182287	PREDICTED: NACHT, LRR and PYD domains-containing protein 3-like, partial [Danio rerio]
isotig05996	18	6	0.0115628	sideroflexin-3 [Danio rerio]
isotig05997	18	6	0.0115628	sideroflexin-3 [Danio rerio]
isotig05604	18	6	0.0115628	Fxr1 protein [Danio rerio]
isotig14238	18	6	0.0115628	fructose-1,6-bisphosphatase 1a [Danio rerio]
isotig14001	19	6	0.00726377	PREDICTED: protein FADD [Danio rerio]
isotig12275	19	6	0.00726377	LOC553482 protein [Danio rerio]
isotig13932	23	6	0.00104221	PREDICTED: APOBEC1 complementation factor isoform 2 [Danio rerio]
isotig14488	24	6	0.000630362	ribonucleoside-diphosphate reductase subunit M2 [Danio rerio]
isotig06563	25	6	0.000379007	carboxy-terminal domain RNA polymerase II polypeptide A small phosphatase 1 [Danio rerio]
isotig26823	27	6	0.000134819	PREDICTED: hypothetical protein LOC100537924 [Danio rerio]
isotig06561	29	6	4.70499e-05	carboxy-terminal domain RNA polymerase II polypeptide A small phosphatase 1 [Danio rerio]
isotig06562	29	6	4.70499e-05	carboxy-terminal domain RNA polymerase II polypeptide A small phosphatase 1 [Danio rerio]
isotig06206	31	6	1.61493e-05	unnamed protein product [Tetraodon nigroviridis]
isotig13084	33	6	5.46313e-06	hypothetical protein LOC571418 [Danio rerio]
isotig15330	41	6	6.3887e-08	PREDICTED: hypothetical protein LOC556125 [Danio rerio]
isotig07383	47	6	2.08365e-09	complement factor I [Ctenopharyngodon idella]
isotig07384	47	6	2.08365e-09	complement factor I [Ctenopharyngodon idella]
isotig06623	75	6	1.50989e-16	uncharacterized protein III [Epinephelus bruneus]
isotig06624	75	6	1.50989e-16	uncharacterized protein III [Epinephelus bruneus]
isotig23604	0	7	0.0109728	unnamed protein product [Tetraodon nigroviridis]
isotig25918	0	7	0.0109728	unnamed protein product [Tetraodon nigroviridis]
isotig28767	0	7	0.0109728	unnamed protein product [Tetraodon nigroviridis]
isotig12841	0	7	0.0109728	ubiquitin domain-containing protein 2 [Danio rerio]
isotig30565	0	7	0.0109728	tRNA (guanine-N(7)-)-methyltransferase subunit WDR4 [Danio rerio]
isotig27692	0	7	0.0109728	transcription activating factor AP-2 alpha 3 [Danio rerio]
isotig16859	0	7	0.0109728	thimet oligopeptidase [Danio rerio]
isotig31193	0	7	0.0109728	solute carrier family 16, member 3 [Danio rerio]
isotig25095	0	7	0.0109728	slingshot 2-like [Danio rerio]
isotig12402	0	7	0.0109728	serine incorporator 5 [Danio rerio]
isotig08239	0	7	0.0109728	Rho GTPase activating protein 4 [Danio rerio]
isotig23704	0	7	0.0109728	proteinase-activated receptor 1 [Danio rerio]
isotig26015	0	7	0.0109728	Proline-rich protein 12 [Dicentrarchus labrax]
isotig18871	0	7	0.0109728	PREDICTED: tensin-like C1 domain-containing phosphatase-like [Danio rerio]
isotig25974	0	7	0.0109728	PREDICTED: SLIT-ROBO Rho GTPase-activating protein 3 [Danio rerio]
isotig04978	0	7	0.0109728	PREDICTED: sialoadhesin [Danio rerio]
isotig26078	0	7	0.0109728	PREDICTED: si:ch211-214k5.3 [Danio rerio]
isotig07756	0	7	0.0109728	PREDICTED: RING finger protein 213 [Danio rerio]
isotig18754	0	7	0.0109728	PREDICTED: ras-related protein Rab-19-like [Danio rerio]
isotig22485	0	7	0.0109728	PREDICTED: protein amnionless [Danio rerio]
isotig26275	0	7	0.0109728	PREDICTED: peroxisomal proliferator-activated receptor A-interacting complex 285 kDa protein-like [Danio rerio]
isotig32013	0	7	0.0109728	PREDICTED: periostin [Danio rerio]
isotig25816	0	7	0.0109728	PREDICTED: LOW QUALITY PROTEIN: wu:fl04e06 [Danio rerio]
isotig31785	0	7	0.0109728	PREDICTED: inositol-trisphosphate 3-kinase C isoform 1 [Danio rerio]
isotig19314	0	7	0.0109728	PREDICTED: inositol hexakisphosphate and diphosphoinositol-pentakisphosphate kinase 1-like [Danio rerio]
isotig29726	0	7	0.0109728	PREDICTED: hypothetical protein LOC556086 [Danio rerio]
isotig19718	0	7	0.0109728	PREDICTED: hypothetical protein LOC100537913 [Danio rerio]
isotig11501	0	7	0.0109728	PREDICTED: hypothetical protein LOC100537160 [Danio rerio]
isotig20608	0	7	0.0109728	PREDICTED: glucosylceramidase-like [Danio rerio]
isotig27572	0	7	0.0109728	PREDICTED: dedicator of cytokinesis protein 2 [Danio rerio]
isotig16846	0	7	0.0109728	parafibromin [Danio rerio]
isotig19012	0	7	0.0109728	Nr2f2 protein [Danio rerio]
isotig17115	0	7	0.0109728	novel protein similar to vertebrate scinderin (SCIN) [Danio rerio]
isotig19044	0	7	0.0109728	novel protein similar to vertebrate abhydrolase domain containing 4 (ABHD4) [Danio rerio]
isotig16162	0	7	0.0109728	novel protein similar to human and mouse par-3 partitioning defective 3 homolog B (C. elegans) (PARD3B) [Danio rerio]
isotig05521	0	7	0.0109728	novel protein similar to H.sapiens ITPKC, inositol 1,4,5-trisphosphate 3-kinase C (ITPKC) [Danio rerio]
isotig05523	0	7	0.0109728	novel protein similar to H.sapiens ITPKC, inositol 1,4,5-trisphosphate 3-kinase C (ITPKC) [Danio rerio]
isotig20031	0	7	0.0109728	N-myc downstream regulated family member 3b [Danio rerio]
isotig24653	0	7	0.0109728	Mcam protein [Danio rerio]
isotig06464	0	7	0.0109728	Low molecular weight phosphotyrosine protein phosphatase [Salmo salar]
isotig06465	0	7	0.0109728	low molecular weight phosphotyrosine protein phosphatase [Danio rerio]
isotig28376	0	7	0.0109728	latexin [Danio rerio]
isotig32131	0	7	0.0109728	integrin, beta 1b [Danio rerio]
isotig17428	0	7	0.0109728	hypothetical protein LOC573117 [Danio rerio]
isotig15274	0	7	0.0109728	hypothetical protein LOC568894 [Danio rerio]
isotig16546	0	7	0.0109728	hypothetical protein LOC100141349 [Danio rerio]
isotig10002	0	7	0.0109728	hepatocyte nuclear factor 4, alpha [Ictalurus punctatus]
isotig17504	0	7	0.0109728	FAM44B [Salmo salar]
isotig23255	0	7	0.0109728	DnaJ homolog subfamily C member 13 [Dicentrarchus labrax]
isotig26302	0	7	0.0109728	DnaJ (Hsp40) homolog, subfamily B, member 1a [Danio rerio]
isotig20591	0	7	0.0109728	cyclic AMP-dependent transcription factor ATF-6 alpha [Danio rerio]
isotig22945	0	7	0.0109728	CR1-3 [Lycodichthys dearborni]
isotig05042	0	7	0.0109728	connector enhancer of kinase suppressor of ras 1 [Danio rerio]
isotig13329	0	7	0.0109728	chromodomain-helicase-DNA-binding protein 8 [Danio rerio]
isotig18623	0	7	0.0109728	brix domain containing 2 [Danio rerio]
isotig15376	0	7	0.0109728	bifunctional aminoacyl-tRNA synthetase [Danio rerio]
isotig17074	0	7	0.0109728	aarF domain containing kinase 5 [Danio rerio]
isotig17587	0	7	0.0109728	39S ribosomal protein L15, mitochondrial precursor [Danio rerio]
isotig12087	1	7	0.025908	WD repeat domain 3 [Danio rerio]
isotig06675	1	7	0.025908	unnamed protein product [Tetraodon nigroviridis]
isotig14151	1	7	0.025908	Uncharacterized protein [Dicentrarchus labrax]
isotig30544	1	7	0.025908	transmembrane protein 14C [Danio rerio]
isotig15367	1	7	0.025908	transcriptional regulator Myc-B [Danio rerio]
isotig06509	1	7	0.025908	trafficking protein particle complex subunit 1 [Danio rerio]
isotig14908	1	7	0.025908	spermine oxidase [Danio rerio]
isotig28782	1	7	0.025908	solute carrier family 2, facilitated glucose transporter member 2 [Danio rerio]
isotig19021	1	7	0.025908	Si:dkey-21n12.1 protein [Danio rerio]
isotig19434	1	7	0.025908	S-acyl fatty acid synthase thioesterase, medium chain [Danio rerio]
isotig14721	1	7	0.025908	RecName: Full=KIF1-binding protein homolog
isotig15664	1	7	0.025908	RecName: Full=Flap endonuclease 1; Short=FEN-1; AltName: Full=Flap structure-specific endonuclease 1
isotig20690	1	7	0.025908	RAB18A, member RAS oncogene family [Danio rerio]
isotig15340	1	7	0.025908	PREDICTED: vesicle transport through interaction with t-SNAREs homolog 1A-like [Monodelphis domestica]
isotig08862	1	7	0.025908	PREDICTED: TBC1 domain family member 1 [Danio rerio]
isotig15295	1	7	0.025908	PREDICTED: tapasin-related protein-like [Danio rerio]
isotig16178	1	7	0.025908	PREDICTED: SLIT-ROBO Rho GTPase-activating protein 3 [Danio rerio]
isotig14921	1	7	0.025908	PREDICTED: serine/threonine-protein kinase WNK1 [Danio rerio]
isotig05120	1	7	0.025908	PREDICTED: serine/threonine-protein kinase MARK2 isoform 1 [Danio rerio]
isotig20613	1	7	0.025908	PREDICTED: putative uncharacterized protein ENSP00000382790-like [Danio rerio]
isotig14647	1	7	0.025908	PREDICTED: protein SCAF8 [Danio rerio]
isotig07907	1	7	0.025908	PREDICTED: probable E3 ubiquitin-protein ligase MGRN1-like isoform 2 [Danio rerio]
isotig07908	1	7	0.025908	PREDICTED: probable E3 ubiquitin-protein ligase MGRN1-like isoform 1 [Danio rerio]
isotig16618	1	7	0.025908	PREDICTED: MLL1/MLL complex subunit KIAA1267-like [Danio rerio]
isotig27681	1	7	0.025908	PREDICTED: mitogen-activated protein kinase kinase kinase kinase 4-like [Danio rerio]
isotig13474	1	7	0.025908	PREDICTED: low-density lipoprotein receptor-related protein 10-like [Danio rerio]
isotig15627	1	7	0.025908	PREDICTED: inositol hexakisphosphate and diphosphoinositol-pentakisphosphate kinase 1-like [Danio rerio]
isotig18340	1	7	0.025908	PREDICTED: hypothetical protein LOC566084 [Danio rerio]
isotig30338	1	7	0.025908	PREDICTED: hypothetical protein LOC327495 [Danio rerio]
isotig20172	1	7	0.025908	PREDICTED: hypothetical protein LOC325517 [Danio rerio]
isotig08717	1	7	0.025908	PREDICTED: hypothetical protein LOC100333185 [Danio rerio]
isotig06447	1	7	0.025908	PREDICTED: cytosolic phospholipase A2 gamma [Danio rerio]
isotig06448	1	7	0.025908	PREDICTED: cytosolic phospholipase A2 gamma [Danio rerio]
isotig27598	1	7	0.025908	PREDICTED: centrosomal protein of 170 kDa [Danio rerio]
isotig24190	1	7	0.025908	PREDICTED: carcinoembryonic antigen-related cell adhesion molecule 5-like [Danio rerio]
isotig24562	1	7	0.025908	PREDICTED: ADM-like [Danio rerio]
isotig15913	1	7	0.025908	peptidyl-prolyl cis-trans isomerase FKBP8 [Danio rerio]
isotig17623	1	7	0.025908	Pc06g02270 [Penicillium chrysogenum Wisconsin 54-1255]
isotig20158	1	7	0.025908	nuclear receptor subfamily 2 group F member 5 [Danio rerio]
isotig31269	1	7	0.025908	novel protein similar to vertebrate misshapen-like kinase 1 (MINK1) [Danio rerio]
isotig04733	1	7	0.025908	novel protein similar to H.sapiens WASL, Wiskott-Aldrich syndrome-like (WASL) [Danio rerio]
isotig04734	1	7	0.025908	novel protein similar to H.sapiens WASL, Wiskott-Aldrich syndrome-like (WASL) [Danio rerio]
isotig29930	1	7	0.025908	novel protein [Danio rerio]
isotig14865	1	7	0.025908	novel protein (zgc:101679) [Danio rerio]
isotig27495	1	7	0.025908	NF-kappa B repressing factor [Danio rerio]
isotig23670	1	7	0.025908	NADH dehydrogenase [ubiquinone] iron-sulfur protein 4, mitochondrial [Danio rerio]
isotig04858	1	7	0.025908	myosin, heavy polypeptide 9, non-muscle [Danio rerio]
isotig25766	1	7	0.025908	mps one binder kinase activator-like 2C [Danio rerio]
isotig06739	1	7	0.025908	leucyl-cystinyl aminopeptidase [Danio rerio]
isotig18755	1	7	0.025908	lactoylglutathione lyase [Danio rerio]
isotig21468	1	7	0.025908	interleukin 11 receptor, alpha [Danio rerio]
isotig13576	1	7	0.025908	hypothetical protein LOC550336 [Danio rerio]
isotig20457	1	7	0.025908	homeobox protein Hox-B5a [Danio rerio]
isotig25243	1	7	0.025908	heterogeneous nuclear ribonucleoprotein U-like protein 1 [Danio rerio]
isotig10633	1	7	0.025908	heterogeneous nuclear ribonucleoprotein U isoform 2 [Danio rerio]
isotig11896	1	7	0.025908	HECT domain containing 3 [Danio rerio]
isotig13150	1	7	0.025908	Formin-like protein 1 [Dicentrarchus labrax]
isotig23286	1	7	0.025908	folate receptor alpha [Danio rerio]
isotig13248	1	7	0.025908	E3 ubiquitin-protein ligase RING2 [Danio rerio]
isotig26278	1	7	0.025908	coiled-coil domain-containing protein 146 [Danio rerio]
isotig18564	1	7	0.025908	chromatin modification-related protein MEAF6 [Danio rerio]
isotig30846	1	7	0.025908	carbonyl reductase 1 [Danio rerio]
isotig24580	1	7	0.025908	B-cell CLL/lymphoma 7B, b [Danio rerio]
isotig30627	1	7	0.025908	arylacetamide deacetylase-like 4 [Danio rerio]
isotig18510	1	7	0.025908	activating transcription factor 6-like protein [Salmo salar]
isotig23163	1	7	0.025908	3-phosphoinositide-dependent protein kinase 1 [Danio rerio]
isotig24082	17	7	0.036288	tectonin beta-propeller repeat-containing protein 2 [Danio rerio]
isotig12300	17	7	0.036288	novel protein similar to vertebrate phospholipase A2, group VII (platelet-activating factor acetylhydrolase, plasma (PLA2G7) [Danio rerio]
isotig13902	17	7	0.036288	myotubularin-related protein 12 [Danio rerio]
isotig12596	17	7	0.036288	Hcfc1a protein [Danio rerio]
isotig13907	18	7	0.023869	Cytohesin 1 [Danio rerio]
isotig16341	18	7	0.023869	CXC chemokine [Cyprinus carpio]
isotig07187	18	7	0.023869	arginine/serine-rich coiled-coil protein 2 [Danio rerio]
isotig05602	19	7	0.0155286	fragile X-related protein [Danio rerio]
isotig03415	19	7	0.0155286	activating transcription factor 4 [Ctenopharyngodon idella]
isotig03416	19	7	0.0155286	activating transcription factor 4 [Ctenopharyngodon idella]
isotig18387	20	7	0.0100008	PREDICTED: ornithine aminotransferase, mitochondrial-like isoform 2 [Danio rerio]
isotig06862	20	7	0.0100008	E4 binding protein 4-6 [Danio rerio]
isotig06863	20	7	0.0100008	E4 binding protein 4-6 [Danio rerio]
isotig07326	21	7	0.00638077	PREDICTED: LOW QUALITY PROTEIN: tyrosine-protein kinase JAK1-like [Meleagris gallopavo]
isotig12171	21	7	0.00638077	novel protein (zgc:55729) [Danio rerio]
isotig04375	21	7	0.00638077	hypothetical protein LOC768128 [Danio rerio]
isotig04376	21	7	0.00638077	hypothetical protein LOC768128 [Danio rerio]
isotig04377	21	7	0.00638077	hypothetical protein LOC768128 [Danio rerio]
isotig09630	24	7	0.00157729	PREDICTED: zinc finger protein 2 homolog [Danio rerio]
isotig11316	25	7	0.000975569	novel protein similar to vertebrate nuclear receptor binding protein 2 (NRBP2) [Danio rerio]
isotig12023	25	7	0.000975569	DNA-damage-inducible transcript 3 [Danio rerio]
isotig30997	26	7	0.000599511	PREDICTED: NACHT, LRR and PYD domains-containing protein 3-like, partial [Danio rerio]
isotig23132	26	7	0.000599511	neurotoxin/C59/Ly-6-like protein [Ctenopharyngodon idella]
isotig07112	27	7	0.000366197	secernin-3 [Danio rerio]
isotig06089	27	7	0.000366197	RecName: Full=Exportin-T; AltName: Full=Exportin(tRNA); AltName: Full=tRNA exportin
isotig06090	27	7	0.000366197	RecName: Full=Exportin-T; AltName: Full=Exportin(tRNA); AltName: Full=tRNA exportin
isotig05611	27	7	0.000366197	alpha-1-microglobulin [Ctenopharyngodon idella]
isotig20573	29	7	0.000134385	sodium-dependent phosphate transporter 1-A [Danio rerio]
isotig20652	0	8	0.00571954	zinc transporter 9 [Xenopus laevis]
isotig15724	0	8	0.00571954	Zgc:152777 protein [Danio rerio]
isotig24038	0	8	0.00571954	unnamed protein product [Tetraodon nigroviridis]
isotig25835	0	8	0.00571954	unnamed protein product [Tetraodon nigroviridis]
isotig27272	0	8	0.00571954	unnamed protein product [Tetraodon nigroviridis]
isotig13947	0	8	0.00571954	RNA polymerase-associated protein CTR9 homolog [Danio rerio]
isotig13275	0	8	0.00571954	ras-related protein Rab-18-B [Danio rerio]
isotig23025	0	8	0.00571954	protein C20orf11 homolog [Danio rerio]
isotig24320	0	8	0.00571954	probable ATP-dependent RNA helicase DDX52 [Danio rerio]
isotig12962	0	8	0.00571954	PREDICTED: ubiquitin-like modifier-activating enzyme 6-like [Danio rerio]
isotig28756	0	8	0.00571954	PREDICTED: SWI/SNF complex subunit SMARCC2-like, partial [Nomascus leucogenys]
isotig26731	0	8	0.00571954	PREDICTED: RING finger protein 122-like [Monodelphis domestica]
isotig21458	0	8	0.00571954	PREDICTED: PAXIP1-associated protein 1 isoform 1 [Danio rerio]
isotig17848	0	8	0.00571954	PREDICTED: interferon-induced very large GTPase 1-like [Danio rerio]
isotig19805	0	8	0.00571954	PREDICTED: hypothetical protein LOC100151013 [Danio rerio]
isotig04646	0	8	0.00571954	PREDICTED: circularly permutated Ras protein 1-like [Danio rerio]
isotig23303	0	8	0.00571954	PREDICTED: calcium-activated chloride channel regulator 4 [Danio rerio]
isotig17859	0	8	0.00571954	phosphatidylinositol-binding clathrin assembly protein [Danio rerio]
isotig19230	0	8	0.00571954	nuclear protein localization protein 4 homolog [Danio rerio]
isotig19592	0	8	0.00571954	novel zinc finger protein [Danio rerio]
isotig22938	0	8	0.00571954	novel protein similar to vertebrate stabilin 2 (STAB2) [Danio rerio]
isotig24686	0	8	0.00571954	novel protein similar to vertebrate polymerase (DNA directed) iota (POLI, zgc:110185) [Danio rerio]
isotig31771	0	8	0.00571954	myxovirus (influenza virus) resistance G [Danio rerio]
isotig07611	0	8	0.00571954	myotubularin-related protein 9 [Danio rerio]
isotig07612	0	8	0.00571954	myotubularin-related protein 9 [Danio rerio]
isotig20084	0	8	0.00571954	homeobox protein Hox-A4a [Danio rerio]
isotig10001	0	8	0.00571954	Hnf4a protein [Danio rerio]
isotig13078	0	8	0.00571954	heterogeneous nuclear ribonucleoprotein H1, like [Danio rerio]
isotig18127	0	8	0.00571954	dnaJ homolog subfamily C member 8 [Danio rerio]
isotig05785	0	8	0.00571954	coiled-coil domain-containing protein 82 [Danio rerio]
isotig14874	0	8	0.00571954	coiled-coil domain-containing protein 28A [Danio rerio]
isotig07671	0	8	0.00571954	C-C motif chemokine 3 precursor [Anoplopoma fimbria]
isotig07672	0	8	0.00571954	C-C motif chemokine 3 precursor [Anoplopoma fimbria]
isotig20113	0	8	0.00571954	Basic helix-loop-helix domain-containing protein KIAA2018 [Dicentrarchus labrax]
isotig20130	0	8	0.00571954	arrestin domain containing 3-like [Danio rerio]
isotig26392	0	8	0.00571954	adenylate cyclase type 2 [Danio rerio]
isotig16816	1	8	0.0138163	unnamed protein product [Tetraodon nigroviridis]
isotig06508	1	8	0.0138163	trafficking protein particle complex subunit 1 [Danio rerio]
isotig14489	1	8	0.0138163	THUMP domain-containing protein 3 [Danio rerio]
isotig13805	1	8	0.0138163	superkiller viralicidic activity 2-like 2 [Danio rerio]
isotig12773	1	8	0.0138163	Squamous cell carcinoma antigen recognised by T cells 3 [Danio rerio]
isotig13628	1	8	0.0138163	sorting nexin-6 [Danio rerio]
isotig10123	1	8	0.0138163	Slc5a9 protein [Danio rerio]
isotig19928	1	8	0.0138163	si:dkey-151c10.1 [Danio rerio]
isotig08343	1	8	0.0138163	ring finger protein 220a [Danio rerio]
isotig08344	1	8	0.0138163	ring finger protein 220a [Danio rerio]
isotig17878	1	8	0.0138163	ribosomal RNA-processing protein 7 homolog A [Danio rerio]
isotig14099	1	8	0.0138163	protein phosphatase methylesterase 1 [Danio rerio]
isotig08381	1	8	0.0138163	PREDICTED: rho GTPase-activating protein 17-like [Danio rerio]
isotig18304	1	8	0.0138163	PREDICTED: poly [ADP-ribose] polymerase 14-like [Danio rerio]
isotig07285	1	8	0.0138163	PREDICTED: phosphatidylserine synthase 1 [Danio rerio]
isotig07286	1	8	0.0138163	PREDICTED: phosphatidylserine synthase 1 [Danio rerio]
isotig12119	1	8	0.0138163	PREDICTED: phosphatidate cytidylyltransferase 1 [Danio rerio]
isotig20026	1	8	0.0138163	PREDICTED: kanadaptin [Danio rerio]
isotig09753	1	8	0.0138163	PREDICTED: hypothetical protein LOC794766 [Danio rerio]
isotig09754	1	8	0.0138163	PREDICTED: hypothetical protein LOC794766 [Danio rerio]
isotig09865	1	8	0.0138163	PREDICTED: hypothetical protein LOC100488485 [Xenopus (Silurana) tropicalis]
isotig14397	1	8	0.0138163	PREDICTED: heme-binding protein 1 [Danio rerio]
isotig07760	1	8	0.0138163	PREDICTED: calcitonin gene-related peptide type 1 receptor-like [Danio rerio]
isotig25375	1	8	0.0138163	pol-like protein [Ciona intestinalis]
isotig14134	1	8	0.0138163	phospholipid scramblase 2 [Danio rerio]
isotig25889	1	8	0.0138163	nuclear receptor coactivator 5 [Danio rerio]
isotig17921	1	8	0.0138163	novel protein similar to vertebrate peroxisomal biogenesis factor 3 (PEX3) (zgc:56313) [Danio rerio]
isotig13097	1	8	0.0138163	novel protein similar to vertebrate F-box and WD repeat domain containing 2 (FBXW2, zgc:110365) [Danio rerio]
isotig18700	1	8	0.0138163	hypothetical protein LOC436902 [Danio rerio]
isotig15379	1	8	0.0138163	hypothetical protein LOC393968 [Danio rerio]
isotig19685	1	8	0.0138163	histone chaperone asf1b-B [Danio rerio]
isotig07922	1	8	0.0138163	filamin A-interacting protein 1-like [Danio rerio]
isotig20282	1	8	0.0138163	endonuclease and reverse transcriptase-like protein [Bombyx mori]
isotig21389	1	8	0.0138163	condensin-2 complex subunit H2 [Danio rerio]
isotig15117	1	8	0.0138163	AT-rich interactive domain-containing protein 4A [Danio rerio]
isotig17219	1	8	0.0138163	aspartylglucosaminidase [Danio rerio]
isotig30235	18	8	0.0445543	PREDICTED: tripartite motif-containing protein 16-like [Danio rerio]
isotig08155	18	8	0.0445543	PREDICTED: olfactomedin-4-like [Danio rerio]
isotig02431	18	8	0.0445543	PREDICTED: e3 ubiquitin/ISG15 ligase TRIM25-like [Danio rerio]
isotig11867	18	8	0.0445543	neurocalcin-delta A [Danio rerio]
isotig15843	19	8	0.0299753	C-X-C motif chemokine 10 precursor [Anoplopoma fimbria]
isotig04055	19	8	0.0299753	asparagine synthetase [Danio rerio]
isotig04056	19	8	0.0299753	Asparagine synthetase [Danio rerio]
isotig04097	20	8	0.0199426	YTH domain-containing protein 1 [Danio rerio]
isotig23876	20	8	0.0199426	hypothetical protein TRIADDRAFT_51202 [Trichoplax adhaerens]
isotig03220	21	8	0.013131	reverse transcriptase-like protein [Paralichthys olivaceus]
isotig03219	21	8	0.013131	ORF2-encoded protein [Danio rerio]
isotig17448	21	8	0.013131	agmatinase, mitochondrial [Danio rerio]
isotig22033	22	8	0.00856303	PREDICTED: zinc finger protein 782-like [Danio rerio]
isotig12220	22	8	0.00856303	PREDICTED: discoidin domain-containing receptor 2 [Danio rerio]
isotig05711	22	8	0.00856303	furin A [Danio rerio]
isotig05712	22	8	0.00856303	furin A [Danio rerio]
isotig12252	23	8	0.00553427	Guanine nucleotide-binding protein GI/GS/GO gamma-5 subunit precursor [Osmerus mordax]
isotig14744	25	8	0.00225561	vacuolar protein sorting-associated protein 28 homolog [Danio rerio]
isotig04053	25	8	0.00225561	asparagine synthetase [Danio rerio]
isotig04054	25	8	0.00225561	Asparagine synthetase [Danio rerio]
isotig09385	26	8	0.00142395	unnamed protein product [Tetraodon nigroviridis]
isotig20200	26	8	0.00142395	solute carrier family 4, anion exchanger, member 2a [Danio rerio]
isotig20768	28	8	0.000556178	PREDICTED: xanthine dehydrogenase/oxidase [Danio rerio]
contig00729	33	8	4.79915e-05	HIG1 domain family member 1A [Danio rerio]
isotig05609	37	8	6.2214e-06	alpha-1-microglobulin [Ctenopharyngodon idella]
isotig21263	177	8	2.2732e-41	complement C3 [Ctenopharyngodon idella]
isotig10714	494	8	9.51854e-119	Serpina1 protein [Danio rerio]
isotig20575	0	9	0.00300402	Zgc:101826 protein [Danio rerio]
isotig18990	0	9	0.00300402	unnamed protein product [Tetraodon nigroviridis]
isotig28718	0	9	0.00300402	unnamed protein product [Tetraodon nigroviridis]
isotig03755	0	9	0.00300402	TANK-binding kinase 1 [Cyprinus carpio]
isotig21520	0	9	0.00300402	sterile alpha motif domain-containing protein 9-like [Mus musculus]
isotig07574	0	9	0.00300402	splicing factor, arginine/serine-rich 3 [Danio rerio]
isotig10997	0	9	0.00300402	spindle and kinetochore-associated protein 2 [Danio rerio]
isotig29321	0	9	0.00300402	Slc5a9 protein [Danio rerio]
isotig13896	0	9	0.00300402	Si:dkeyp-114f9.2 protein [Danio rerio]
isotig25128	0	9	0.00300402	short-chain specific acyl-CoA dehydrogenase, mitochondrial [Danio rerio]
isotig22709	0	9	0.00300402	sentrin-specific protease 5 [Danio rerio]
isotig18883	0	9	0.00300402	ribonuclease H2 subunit B [Danio rerio]
isotig25462	0	9	0.00300402	RecName: Full=Riboflavin transporter 2-A; Short=RFT2-A
isotig21217	0	9	0.00300402	ral guanine nucleotide dissociation stimulator [Danio rerio]
isotig13318	0	9	0.00300402	protein-associating with the carboxyl-terminal domain of ezrin [Danio rerio]
isotig11916	0	9	0.00300402	PREDICTED: TBC1 domain family member 4 [Danio rerio]
isotig14345	0	9	0.00300402	PREDICTED: spermatid perinuclear RNA-binding protein isoform 2 [Danio rerio]
isotig23619	0	9	0.00300402	PREDICTED: similar to chromatin assembly factor-I p60 subunit [Ornithorhynchus anatinus]
isotig18315	0	9	0.00300402	PREDICTED: probable protein BRICK1-like isoform 2 [Sus scrofa]
isotig18875	0	9	0.00300402	PREDICTED: probable G-protein coupled receptor 141 [Danio rerio]
isotig06824	0	9	0.00300402	PREDICTED: probable E3 ubiquitin-protein ligase HERC4 [Danio rerio]
isotig06825	0	9	0.00300402	PREDICTED: probable E3 ubiquitin-protein ligase HERC4 [Danio rerio]
isotig20233	0	9	0.00300402	PREDICTED: hypothetical protein LOC797886 [Danio rerio]
isotig30636	0	9	0.00300402	PREDICTED: hypothetical protein LOC368364 [Danio rerio]
isotig19611	0	9	0.00300402	PREDICTED: FACT complex subunit SSRP1 [Danio rerio]
isotig31242	0	9	0.00300402	PREDICTED: calcium-activated chloride channel regulator 4 [Danio rerio]
isotig27393	0	9	0.00300402	PREDICTED: bromodomain adjacent to zinc finger domain protein 2B isoform 2 [Xenopus (Silurana) tropicalis]
isotig29262	0	9	0.00300402	ORF2-encoded protein [Danio rerio]
isotig24002	0	9	0.00300402	Nuclear factor interleukin-3-regulated protein [Salmo salar]
isotig17747	0	9	0.00300402	intersectin 1 (SH3 domain protein) [Danio rerio]
isotig18243	0	9	0.00300402	hypothetical protein LOC792608 [Danio rerio]
isotig13989	0	9	0.00300402	hypothetical protein LOC100170789 [Danio rerio]
isotig24790	0	9	0.00300402	Hsf1 protein [Danio rerio]
isotig19913	0	9	0.00300402	cytoskeleton associated protein 2-like [Danio rerio]
isotig12556	0	9	0.00300402	arrestin domain containing 1a [Danio rerio]
isotig27292	0	9	0.00300402	aminopeptidase N [Danio rerio]
isotig13877	0	9	0.00300402	amiloride-sensitive amine oxidase [Danio rerio]
isotig30088	0	9	0.00300402	60S ribosomal protein L34 [Salmo salar]
isotig17047	1	9	0.00736589	vasodilator-stimulated phosphoprotein [Danio rerio]
isotig06954	1	9	0.00736589	UDP-N-acetylhexosamine pyrophosphorylase [Danio rerio]
isotig06955	1	9	0.00736589	UDP-N-acetylhexosamine pyrophosphorylase [Danio rerio]
isotig08844	1	9	0.00736589	ubiquitin-conjugating enzyme E2 S [Danio rerio]
isotig23067	1	9	0.00736589	two pore channel 3 [Danio rerio]
isotig18673	1	9	0.00736589	TGFB-induced factor homeobox 1 [Danio rerio]
isotig10124	1	9	0.00736589	Slc5a9 protein [Danio rerio]
isotig18506	1	9	0.00736589	RecName: Full=WD repeat-containing protein 55
isotig24283	1	9	0.00736589	protein tyrosine phosphatase, non-receptor type 4, b [Danio rerio]
isotig31298	1	9	0.00736589	PREDICTED: sialoadhesin [Danio rerio]
isotig13665	1	9	0.00736589	PREDICTED: RAC-alpha serine/threonine-protein kinase-like [Danio rerio]
isotig16271	1	9	0.00736589	PREDICTED: probable phospholipid-transporting ATPase ID [Danio rerio]
isotig11989	1	9	0.00736589	PREDICTED: e3 ubiquitin-protein ligase BRE1A [Danio rerio]
isotig09040	1	9	0.00736589	PREDICTED: coagulation factor V-like [Xenopus (Silurana) tropicalis]
isotig09584	1	9	0.00736589	novel protein similar to vertebrate solute carrier family 5 (sodium/glucose cotransporter), member 2 (SLC5A2) (zgc:85792) [Danio rerio]
isotig15494	1	9	0.00736589	novel protein (zgc:171713) [Danio rerio]
isotig08786	1	9	0.00736589	hypothetical protein LOC751740 [Danio rerio]
isotig06312	1	9	0.00736589	hypothetical protein LOC447883 [Danio rerio]
isotig06313	1	9	0.00736589	hypothetical protein LOC447883 [Danio rerio]
isotig14678	1	9	0.00736589	hypothetical protein LOC402952 [Danio rerio]
isotig12391	1	9	0.00736589	exostosin-2 [Danio rerio]
isotig12408	1	9	0.00736589	DnaJ (Hsp40) homolog, subfamily C, member 3 [Danio rerio]
isotig07590	1	9	0.00736589	delta(3,5)-Delta(2,4)-dienoyl-CoA isomerase, mitochondrial [Danio rerio]
isotig18592	1	9	0.00736589	CD2 antigen cytoplasmic tail-binding protein 2 [Danio rerio]
isotig22122	1	9	0.00736589	beta-1,4 N-acetylgalactosaminyltransferase 1 [Danio rerio]
isotig21203	1	9	0.00736589	5-aminolevulinate synthase, erythroid-specific, mitochondrial precursor [Danio rerio]
isotig28719	1	9	0.00736589	26S proteasome complex subunit DSS1 [Danio rerio]
isotig16664	2	9	0.0294567	WW domain-binding protein 4 [Danio rerio]
isotig10757	2	9	0.0294567	WD repeat domain, phosphoinositide interacting 2 [Danio rerio]
isotig15197	2	9	0.0294567	UDP-glucose 4-epimerase [Danio rerio]
isotig22343	2	9	0.0294567	transcription factor Dp-1, b [Danio rerio]
isotig19262	2	9	0.0294567	transcription elongation regulator 1 [Danio rerio]
isotig14611	2	9	0.0294567	ras homolog enriched in brain [Danio rerio]
isotig15148	2	9	0.0294567	protein phosphatase 2, regulatory subunit B&apos;, epsilon isoform a [Danio rerio]
isotig18163	2	9	0.0294567	proteasome subunit alpha type-1 [Danio rerio]
isotig13409	2	9	0.0294567	PREDICTED: zinc finger protein 271-like [Acyrthosiphon pisum]
isotig12224	2	9	0.0294567	PREDICTED: vacuolar protein sorting-associated protein 41 homolog [Danio rerio]
isotig24851	2	9	0.0294567	PREDICTED: uncharacterized protein C3orf59-like [Danio rerio]
isotig17311	2	9	0.0294567	PREDICTED: protein timeless homolog [Danio rerio]
isotig14530	2	9	0.0294567	PREDICTED: pituitary tumor-transforming gene 1 protein-interacting protein [Danio rerio]
isotig07238	2	9	0.0294567	PREDICTED: mucolipin-3-like [Danio rerio]
isotig16476	2	9	0.0294567	PREDICTED: inositol 1,4,5-trisphosphate receptor type 2-like [Danio rerio]
isotig02652	2	9	0.0294567	PREDICTED: hypothetical protein LOC568036 [Danio rerio]
isotig02653	2	9	0.0294567	PREDICTED: hypothetical protein LOC568036 [Danio rerio]
isotig02654	2	9	0.0294567	PREDICTED: hypothetical protein LOC568036 [Danio rerio]
contig12093	2	9	0.0294567	PREDICTED: hypothetical protein LOC564101 [Danio rerio]
isotig13139	2	9	0.0294567	PREDICTED: hypothetical protein LOC368429 [Danio rerio]
isotig05039	2	9	0.0294567	PREDICTED: hypothetical protein LOC100331153 [Danio rerio]
isotig13126	2	9	0.0294567	PREDICTED: heterogeneous nuclear ribonucleoprotein M [Danio rerio]
isotig14012	2	9	0.0294567	PREDICTED: glucosamine-6-phosphate isomerase 2-like [Danio rerio]
isotig12740	2	9	0.0294567	PREDICTED: exportin-1, partial [Danio rerio]
isotig03774	2	9	0.0294567	PREDICTED: dual specificity protein kinase CLK4 [Danio rerio]
isotig17236	2	9	0.0294567	PREDICTED: clathrin heavy chain 1-like [Anolis carolinensis]
isotig15382	2	9	0.0294567	pin2/trf1-interacting protein 1 [Danio rerio]
isotig14532	2	9	0.0294567	phosphatidylinositol phosphate 5-kinase type III isoform c [Danio rerio]
isotig18549	2	9	0.0294567	nuclear pore complex protein Nup107 [Danio rerio]
isotig29194	2	9	0.0294567	novel protein [Danio rerio]
isotig19848	2	9	0.0294567	methyltransferase like 7A [Danio rerio]
isotig17405	2	9	0.0294567	lysine-specific demethylase 4B [Danio rerio]
isotig15853	2	9	0.0294567	LOC407684 protein [Danio rerio]
isotig10780	2	9	0.0294567	immediate early response 2 [Danio rerio]
isotig10781	2	9	0.0294567	immediate early response 2 [Danio rerio]
isotig19183	2	9	0.0294567	hypothetical protein LOC797937 [Danio rerio]
isotig17682	2	9	0.0294567	hypothetical protein LOC554134 [Danio rerio]
isotig16320	2	9	0.0294567	heme oxygenase [Ictalurus furcatus]
isotig16598	2	9	0.0294567	HBS1-like protein [Salmo salar]
isotig24096	2	9	0.0294567	GTPase IMAP family member 7 [Salmo salar]
isotig23739	2	9	0.0294567	Gig2-like protein DreF [Danio rerio]
isotig14124	2	9	0.0294567	family with sequence similarity 3, member C [Danio rerio]
isotig08545	2	9	0.0294567	dynactin subunit 3 [Danio rerio]
isotig12718	2	9	0.0294567	dual specificity protein phosphatase 2 [Danio rerio]
isotig15752	2	9	0.0294567	cell division cycle associated 8 [Danio rerio]
isotig30659	21	9	0.0247356	PREDICTED: tripartite motif-containing protein 16-like [Danio rerio]
isotig12477	21	9	0.0247356	dual specificity protein phosphatase 22-B [Danio rerio]
isotig12082	22	9	0.0166127	PREDICTED: filamin-B-like, partial [Meleagris gallopavo]
isotig16953	22	9	0.0166127	novel protein similar to vertebrate solute carrier family 9 (sodium/hydrogen exchanger) [Danio rerio]
isotig14262	23	9	0.0110485	complement C4-2 [Cyprinus carpio]
isotig07465	24	9	0.00728087	uncharacterized protein c1orf43-like protein [Ictalurus punctatus]
isotig17489	25	9	0.00475702	homeobox protein mohawk A [Danio rerio]
isotig17411	26	9	0.00308308	unnamed protein product [Tetraodon nigroviridis]
isotig05612	26	9	0.00308308	alpha-1-microglobulin [Ctenopharyngodon idella]
isotig04244	28	9	0.00126653	PREDICTED: interferon-induced very large GTPase 1-like [Danio rerio]
isotig10462	28	9	0.00126653	Na+/H+ exchanger isoform 3 [Tribolodon hakonensis]
isotig10463	28	9	0.00126653	Na+/H+ exchanger isoform 3 [Tribolodon hakonensis]
isotig13969	28	9	0.00126653	C1r/s-B [Cyprinus carpio]
isotig13600	29	9	0.000803467	PREDICTED: adipocyte enhancer-binding protein 1-like [Danio rerio]
isotig08695	30	9	0.000506492	hypothetical protein LOC799220 [Danio rerio]
isotig08696	30	9	0.000506492	hypothetical protein LOC799220 [Danio rerio]
isotig07928	34	9	7.55812e-05	PREDICTED: tet oncogene family member 2 [Taeniopygia guttata]
isotig09315	36	9	2.83365e-05	protein tyrosine phosphatase-like A domain containing 2-like [Danio rerio]
isotig03925	38	9	1.04415e-05	oxysterol-binding protein-related protein 1 [Danio rerio]
isotig03924	38	9	1.04415e-05	Osbpl1a protein [Danio rerio]
isotig03923	39	9	6.30058e-06	oxysterol-binding protein-related protein 1 [Danio rerio]
isotig03922	39	9	6.30058e-06	Osbpl1a protein [Danio rerio]
isotig11887	47	9	9.81874e-08	Syndecan-2-A precursor [Anoplopoma fimbria]
isotig19541	0	10	0.00158893	WW domain containing adaptor with coiled-coil b [Danio rerio]
isotig22221	0	10	0.00158893	vacuolar protein sorting-associated protein 16 homolog [Danio rerio]
isotig12675	0	10	0.00158893	vacuolar protein sorting-associated protein 11 homolog [Danio rerio]
isotig12916	0	10	0.00158893	unnamed protein product [Tetraodon nigroviridis]
isotig03754	0	10	0.00158893	TANK-binding kinase 1 [Cyprinus carpio]
isotig13316	0	10	0.00158893	Si:dkey-98f17.2 protein [Danio rerio]
isotig26951	0	10	0.00158893	RecName: Full=POU domain, class 3, transcription factor 3-A; AltName: Full=Brain-specific homeobox/POU domain protein 1.1; Short=Brain-1.1; Short=zfBrn-1.1; AltName: Full=Class III POU domain protein taichi; AltName: Full=POU domain protein 12; Short=ZP-12
isotig25662	0	10	0.00158893	PREDICTED: zinc finger and BTB domain-containing protein 16-A-like [Danio rerio]
isotig23348	0	10	0.00158893	PREDICTED: structure-specific endonuclease subunit SLX4 [Danio rerio]
isotig05121	0	10	0.00158893	PREDICTED: serine/threonine-protein kinase MARK2 isoform 1 [Danio rerio]
isotig08982	0	10	0.00158893	PREDICTED: probable palmitoyltransferase ZDHHC20-like [Danio rerio]
isotig14460	0	10	0.00158893	PREDICTED: probable E3 ubiquitin-protein ligase HERC4 [Danio rerio]
isotig30026	0	10	0.00158893	PREDICTED: paired box protein Pax-8, partial [Danio rerio]
isotig14592	0	10	0.00158893	PREDICTED: hypothetical protein LOC553518 [Danio rerio]
contig00242	0	10	0.00158893	PREDICTED: coronin-7-like [Danio rerio]
isotig18042	0	10	0.00158893	novel protein similar to vertebrate PHD finger protein 3 (PHF3) [Danio rerio]
isotig17762	0	10	0.00158893	mitofusin-1 [Danio rerio]
isotig24744	0	10	0.00158893	Josephin-1 [Danio rerio]
isotig10724	0	10	0.00158893	interferon-inducible protein IFI58 [Carassius auratus]
isotig10725	0	10	0.00158893	interferon-inducible protein IFI58 [Carassius auratus]
isotig24763	0	10	0.00158893	hypothetical protein LOC561095 [Danio rerio]
isotig04645	0	10	0.00158893	four and a half LIM domains [Danio rerio]
isotig20542	0	10	0.00158893	cytosolic Fe-S cluster assembly factor nubp2 [Danio rerio]
isotig17628	1	10	0.00392854	SAM domain-containing protein SAMSN-1 [Danio rerio]
isotig14912	1	10	0.00392854	RNA binding protein S1, serine-rich domain [Danio rerio]
isotig10903	1	10	0.00392854	Proteasome subunit beta type-7 precursor [Salmo salar]
isotig09216	1	10	0.00392854	PREDICTED: polymeric immunoglobulin receptor-like [Sus scrofa]
isotig20963	1	10	0.00392854	PREDICTED: peptidyl-glycine alpha-amidating monooxygenase A [Danio rerio]
isotig24856	1	10	0.00392854	PREDICTED: midasin [Danio rerio]
isotig05065	1	10	0.00392854	PREDICTED: LOW QUALITY PROTEIN: serine/threonine-protein kinase MARK2 [Danio rerio]
isotig26166	1	10	0.00392854	PREDICTED: hypothetical protein LOC452143 [Pan troglodytes]
isotig07921	1	10	0.00392854	PREDICTED: hypothetical protein LOC100333059 [Danio rerio]
isotig21278	1	10	0.00392854	PREDICTED: d-aspartate oxidase-like isoform 1 [Danio rerio]
isotig17802	1	10	0.00392854	novel protein similar to vertebrate mixed lineage kinase 4 (KIAA1804) [Danio rerio]
isotig19752	1	10	0.00392854	novel protein similar to H.sapiens DNAJC19, DnaJ (Hsp40) homolog, subfamily C, member 19 (DNAJC19, zgc:92393) [Danio rerio]
isotig26980	1	10	0.00392854	novel protein containing an immunoglobulin domain [Danio rerio]
isotig20165	1	10	0.00392854	hypothetical protein LOC550611 isoform 1 [Danio rerio]
isotig25297	1	10	0.00392854	huntingtin interacting protein B [Danio rerio]
isotig13567	1	10	0.00392854	HEAT repeat-containing protein 1 [Danio rerio]
isotig07589	1	10	0.00392854	delta(3,5)-Delta(2,4)-dienoyl-CoA isomerase, mitochondrial [Danio rerio]
isotig19048	1	10	0.00392854	cyclic AMP-responsive element-binding protein 1 [Danio rerio]
isotig18473	1	10	0.00392854	C-type lectin receptor [Paralabidochromis chilotes]
isotig05784	1	10	0.00392854	coiled-coil domain-containing protein 82 [Danio rerio]
isotig14583	1	10	0.00392854	chromodomain helicase DNA binding protein 1 [Danio rerio]
isotig12667	1	10	0.00392854	apolipoprotein L, 1 [Danio rerio]
isotig15007	1	10	0.00392854	activator of basal transcription 1 [Danio rerio]
isotig22196	1	10	0.00392854	actin-binding LIM protein 1 [Danio rerio]
isotig31411	2	10	0.016712	Zgc:65788 protein [Danio rerio]
isotig25658	2	10	0.016712	unnamed protein product [Tetraodon nigroviridis]
isotig17767	2	10	0.016712	splicing factor 3B subunit 4 [Danio rerio]
isotig13783	2	10	0.016712	protein YIPF4 [Danio rerio]
isotig17344	2	10	0.016712	PREDICTED: multiple C2 and transmembrane domain-containing protein 2 [Danio rerio]
isotig09679	2	10	0.016712	PREDICTED: hypothetical protein LOC100537501 [Danio rerio]
isotig15147	2	10	0.016712	PREDICTED: hypothetical protein LOC100307101 isoform 3 [Danio rerio]
isotig14997	2	10	0.016712	PREDICTED: FYVE, RhoGEF and PH domain-containing protein 4-like, partial [Danio rerio]
isotig12448	2	10	0.016712	PREDICTED: ETS-related transcription factor Elf-3 [Danio rerio]
isotig23628	2	10	0.016712	PREDICTED: EGF-like module-containing mucin-like hormone receptor-like 3-like [Danio rerio]
isotig09797	2	10	0.016712	PREDICTED: c-type lectin domain family 4 member F-like [Danio rerio]
isotig09798	2	10	0.016712	PREDICTED: c-type lectin domain family 4 member F-like [Danio rerio]
isotig07227	2	10	0.016712	novel protein similar to vertebrate male-enhanced antigen 1 (MEA1, zgc:86834) [Danio rerio]
isotig02535	2	10	0.016712	novel protein (zgc:153654) [Danio rerio]
isotig00053	2	10	0.016712	immunoglobulin heavy chain variable region [Danio rerio]
isotig14116	2	10	0.016712	hypothetical protein LOC561051 [Danio rerio]
isotig08427	2	10	0.016712	hypothetical protein LOC561001 [Danio rerio]
isotig15543	2	10	0.016712	glutaredoxin 3 [Danio rerio]
isotig13539	2	10	0.016712	Dyskeratosis congenita 1, dyskerin [Danio rerio]
isotig12701	2	10	0.016712	dynactin subunit 4 [Danio rerio]
isotig21834	2	10	0.016712	dead eye [Danio rerio]
isotig29074	2	10	0.016712	dachshund homolog 1 [Danio rerio]
isotig16449	2	10	0.016712	Cno protein [Danio rerio]
isotig15363	2	10	0.016712	arrestin, beta 2b [Danio rerio]
isotig27140	2	10	0.016712	AP-3 complex subunit sigma-1 [Danio rerio]
isotig07093	3	10	0.0480106	tyrosine-protein phosphatase non-receptor type 22 [Danio rerio]
isotig22266	3	10	0.0480106	Transmembrane protein 43 [Salmo salar]
isotig15317	3	10	0.0480106	trafficking protein particle complex 6b-like [Danio rerio]
isotig14517	3	10	0.0480106	speckle-type POZ protein-like A [Danio rerio]
isotig13954	3	10	0.0480106	sister chromatid cohesion protein PDS5 homolog A [Danio rerio]
isotig19494	3	10	0.0480106	SI:dZ87I4.1 (novel protein similar to human signal transducer and activator of transcription (STAT1)) [Danio rerio]
isotig14078	3	10	0.0480106	rho-associated protein kinase 1 [Gallus gallus]
isotig06911	3	10	0.0480106	RecName: Full=Ubiquitin-fold modifier-conjugating enzyme 1; AltName: Full=Ufm1-conjugating enzyme 1
isotig22394	3	10	0.0480106	rCG54354 [Rattus norvegicus]
isotig07335	3	10	0.0480106	ras-related protein Rab-9A [Salmo salar]
isotig07336	3	10	0.0480106	ras-related protein Rab-9A [Salmo salar]
isotig05917	3	10	0.0480106	PREDICTED: RING finger protein 213-like [Danio rerio]
isotig19710	3	10	0.0480106	PREDICTED: RING finger protein 186 isoform 1 [Danio rerio]
isotig11143	3	10	0.0480106	PREDICTED: hypothetical protein LOC100003022 [Danio rerio]
isotig02589	3	10	0.0480106	PREDICTED: CD209 antigen-like, partial [Danio rerio]
isotig02590	3	10	0.0480106	PREDICTED: CD209 antigen-like, partial [Danio rerio]
isotig12994	3	10	0.0480106	PREDICTED: catenin (cadherin-associated protein), beta 1, 88kDa [Taeniopygia guttata]
isotig05087	3	10	0.0480106	PREDICTED: a-kinase anchor protein 10, mitochondrial [Danio rerio]
isotig05088	3	10	0.0480106	PREDICTED: a-kinase anchor protein 10, mitochondrial [Danio rerio]
isotig15294	3	10	0.0480106	PHD finger protein 20, b [Danio rerio]
isotig15029	3	10	0.0480106	oxidative stress-induced growth inhibitor 1 [Danio rerio]
isotig16334	3	10	0.0480106	nucleolar complex protein 3 homolog [Danio rerio]
isotig19510	3	10	0.0480106	NADH dehydrogenase [ubiquinone] flavoprotein 2, mitochondrial precursor [Danio rerio]
isotig13617	3	10	0.0480106	MORC family CW-type zinc finger protein 3 [Danio rerio]
isotig11539	3	10	0.0480106	lysosomal alpha-mannosidase [Danio rerio]
isotig15968	3	10	0.0480106	Interactor protein for cytohesin exchange factors 1 [Salmo salar]
isotig13219	3	10	0.0480106	histocompatibility 13 [Danio rerio]
isotig18167	3	10	0.0480106	granulin-a [Danio rerio]
isotig14857	3	10	0.0480106	chico [Danio rerio]
isotig12306	3	10	0.0480106	charged multivesicular body protein 4b [Danio rerio]
isotig17105	3	10	0.0480106	cell division control protein 2 homolog [Danio rerio]
isotig13176	3	10	0.0480106	alpha-N-acetylgalactosaminidase [Danio rerio]
isotig15090	3	10	0.0480106	aladin [Danio rerio]
isotig11099	3	10	0.0480106	activated RNA polymerase II transcriptional coactivator p15 [Danio rerio]
isotig04532	21	10	0.043194	PREDICTED: hypothetical protein LOC100149379 [Danio rerio]
isotig12371	21	10	0.043194	Myo1bl2 protein [Danio rerio]
isotig14897	22	10	0.0298429	vang-like protein 2 [Danio rerio]
isotig07090	22	10	0.0298429	coenzyme Q-binding protein COQ10 homolog B, mitochondrial precursor [Danio rerio]
isotig09529	23	10	0.0204031	Uncharacterized protein [Dicentrarchus labrax]
isotig09530	23	10	0.0204031	Uncharacterized protein [Dicentrarchus labrax]
isotig11754	24	10	0.0138123	syntaxin 5 [Danio rerio]
isotig07091	24	10	0.0138123	coenzyme Q-binding protein COQ10 homolog B, mitochondrial precursor [Danio rerio]
isotig13693	27	10	0.00406214	purine nucleoside phosphorylase 5a [Danio rerio]
isotig15649	27	10	0.00406214	immunoglobulin Z heavy chain [Ctenopharyngodon idella]
isotig13221	29	10	0.00172671	lamin-B receptor [Danio rerio]
isotig07910	30	10	0.00111394	caspase c [Danio rerio]
isotig05610	36	10	7.0778e-05	alpha-1-microglobulin [Ctenopharyngodon idella]
isotig12081	55	10	4.38148e-09	novel protein [Danio rerio]
isotig07577	76	10	3.90692e-14	PREDICTED: granzyme E [Danio rerio]
isotig16286	77	10	2.21465e-14	PREDICTED: complement C3 [Danio rerio]
isotig15299	156	10	1.6863e-34	unnamed protein product [Tetraodon nigroviridis]
isotig14381	0	11	0.000845998	unnamed protein product [Tetraodon nigroviridis]
isotig17661	0	11	0.000845998	unnamed protein product [Tetraodon nigroviridis]
isotig19732	0	11	0.000845998	U2 small nuclear ribonucleoprotein A&apos; [Salmo salar]
isotig14240	0	11	0.000845998	transcriptional regulator ATRX [Danio rerio]
isotig16008	0	11	0.000845998	TRAF family member-associated NF-kappa-B activator [Danio rerio]
isotig21848	0	11	0.000845998	SH3 domain-binding protein 5 [Danio rerio]
isotig15863	0	11	0.000845998	PREDICTED: tyrosine-protein kinase BTK [Danio rerio]
isotig08317	0	11	0.000845998	PREDICTED: hypothetical protein LOC100332217 [Danio rerio]
isotig29522	0	11	0.000845998	phosphatidylserine synthase 1 [Danio rerio]
isotig09012	0	11	0.000845998	nucleolar protein family 6 [Danio rerio]
isotig18732	0	11	0.000845998	novel protein similar to vertebrate transmembrane 4 superfamily member 1 (TM4SF1) [Danio rerio]
isotig25411	0	11	0.000845998	mannose-1-phosphate guanyltransferase beta [Danio rerio]
isotig14534	0	11	0.000845998	hypothetical protein IscW_ISCW024353 [Ixodes scapularis]
isotig05040	0	11	0.000845998	connector enhancer of kinase suppressor of ras 1 [Danio rerio]
isotig17041	0	11	0.000845998	Baz1a protein [Danio rerio]
isotig22216	0	11	0.000845998	Baz1a protein [Danio rerio]
isotig22226	1	11	0.00209713	unnamed protein product [Tetraodon nigroviridis]
isotig04340	1	11	0.00209713	tyrosine phosphatase type IVA 2 [Salmo salar]
isotig23245	1	11	0.00209713	RNA polymerase II transcriptional coactivator [Danio rerio]
isotig14109	1	11	0.00209713	ras-related GTP-binding protein A [Danio rerio]
isotig17441	1	11	0.00209713	PREDICTED: phosphatidylinositol-binding clathrin assembly protein [Danio rerio]
isotig13255	1	11	0.00209713	PREDICTED: nardilysin [Danio rerio]
isotig13945	1	11	0.00209713	PREDICTED: hormone-sensitive lipase [Danio rerio]
isotig19101	1	11	0.00209713	PREDICTED: GTPase IMAP family member 2-like [Danio rerio]
isotig28435	1	11	0.00209713	mannose-1-phosphate guanyltransferase beta [Danio rerio]
isotig21005	1	11	0.00209713	LOW QUALITY PROTEIN: conserved hypothetical protein [Bacteroides sp. D1]
isotig15101	1	11	0.00209713	dnaJ homolog subfamily A member 1 [Danio rerio]
isotig17550	1	11	0.00209713	AP-3 complex subunit sigma-2 [Danio rerio]
isotig11567	2	11	0.00941383	unnamed protein product [Tetraodon nigroviridis]
isotig17564	2	11	0.00941383	unnamed protein product [Tetraodon nigroviridis]
isotig20646	2	11	0.00941383	Transposase [Dicentrarchus labrax]
isotig12781	2	11	0.00941383	single stranded DNA binding protein 3b [Danio rerio]
isotig13660	2	11	0.00941383	RecName: Full=Interleukin enhancer-binding factor 3 homolog
isotig16431	2	11	0.00941383	PREDICTED: rab11 family-interacting protein 3 [Danio rerio]
isotig16513	2	11	0.00941383	PREDICTED: PAB-dependent poly(A)-specific ribonuclease subunit 2-like [Danio rerio]
isotig18955	2	11	0.00941383	PREDICTED: matrix metalloproteinase-25-like [Danio rerio]
contig12090	2	11	0.00941383	PREDICTED: hypothetical protein LOC564101 [Danio rerio]
isotig11801	2	11	0.00941383	PREDICTED: hypothetical protein LOC100005882 [Danio rerio]
isotig15014	2	11	0.00941383	PREDICTED: ecotropic viral integration site 5 protein homolog [Monodelphis domestica]
isotig15220	2	11	0.00941383	nuclear factor NF-kappa-B p100 subunit [Danio rerio]
isotig02534	2	11	0.00941383	novel protein (zgc:153654) [Danio rerio]
isotig22360	2	11	0.00941383	mitochondrial NADH dehydrogenase 1 beta subcomplex subunit 5 [Ictalurus furcatus]
isotig18713	2	11	0.00941383	LOC560531 protein [Danio rerio]
isotig04759	2	11	0.00941383	lipopolysaccharide-induced tumor necrosis factor-alpha factor homolog [Danio rerio]
isotig04760	2	11	0.00941383	lipopolysaccharide-induced tumor necrosis factor-alpha factor homolog [Danio rerio]
isotig15655	2	11	0.00941383	lamina-associated polypeptide 1B [Danio rerio]
isotig29022	2	11	0.00941383	isochorismatase domain-containing protein 2 [Danio rerio]
isotig13251	2	11	0.00941383	forkhead box P1a [Danio rerio]
isotig23599	2	11	0.00941383	dynamin-2 [Danio rerio]
isotig11650	2	11	0.00941383	coronin-2A [Danio rerio]
isotig13697	2	11	0.00941383	calcium-binding mitochondrial carrier protein SCaMC-1 [Danio rerio]
isotig07333	2	11	0.00941383	breast cancer metastasis-suppressor 1 [Danio rerio]
isotig07334	2	11	0.00941383	breast cancer metastasis-suppressor 1 [Danio rerio]
isotig13619	2	11	0.00941383	aspartyl aminopeptidase [Danio rerio]
isotig20643	3	11	0.0287801	Zhx3 protein [Danio rerio]
isotig15361	3	11	0.0287801	unc-13 homolog D [Salmo salar]
isotig15711	3	11	0.0287801	U2-associated SR140 protein-like [Danio rerio]
isotig07331	3	11	0.0287801	sorting nexin-7 [Danio rerio]
isotig07332	3	11	0.0287801	sorting nexin-7 [Danio rerio]
isotig11244	3	11	0.0287801	SJCHGC03036 protein [Schistosoma japonicum]
isotig14137	3	11	0.0287801	RIO kinase 2 [Danio rerio]
isotig28686	3	11	0.0287801	reverse transcriptase [Danio rerio]
isotig18009	3	11	0.0287801	pre-mRNA branch site protein p14 [Homo sapiens]
isotig12942	3	11	0.0287801	PREDICTED: thrombospondin-1 [Danio rerio]
isotig13975	3	11	0.0287801	PREDICTED: hypothetical protein LOC556124 [Danio rerio]
isotig20227	3	11	0.0287801	PREDICTED: deleted in malignant brain tumors 1 protein-like [Danio rerio]
isotig02588	3	11	0.0287801	PREDICTED: CD209 antigen-like, partial [Danio rerio]
isotig11561	3	11	0.0287801	phosphatidylinositol-4-phosphate 5-kinase, type I, alpha, b [Danio rerio]
isotig20737	3	11	0.0287801	NudE-like protein 1a [Danio rerio]
isotig07058	3	11	0.0287801	novel protein similar to vertebrate development and differentiation enhancing factor family (DDEF1 and DDEF2) [Danio rerio]
isotig13829	3	11	0.0287801	novel protein (zgc:55818) [Danio rerio]
isotig15381	3	11	0.0287801	inorganic pyrophosphatase [Danio rerio]
isotig10578	3	11	0.0287801	hypothetical protein LOC100101649 [Danio rerio]
isotig10579	3	11	0.0287801	hypothetical protein LOC100101649 [Danio rerio]
isotig12156	3	11	0.0287801	dipeptidyl peptidase 9 [Danio rerio]
isotig14101	3	11	0.0287801	carnitine O-acetyltransferase-like [Danio rerio]
isotig22000	3	11	0.0287801	Brain protein 44-like protein [Oncorhynchus mykiss]
isotig12704	23	11	0.0352061	perforin-like protein 1 [Ctenopharyngodon idella]
isotig12828	23	11	0.0352061	nucleoside diphosphate-linked moiety X motif 18 [Danio rerio]
isotig06186	23	11	0.0352061	ADP-ribosylation factor 1 [Clavispora lusitaniae ATCC 42720]
isotig06187	23	11	0.0352061	ADP-ribosylation factor 1 [Clavispora lusitaniae ATCC 42720]
isotig21304	25	11	0.0168281	PREDICTED: hypothetical protein LOC100537016 [Danio rerio]
isotig13011	26	11	0.0114699	sodium-dependent phosphate transporter 1-B [Danio rerio]
isotig07607	26	11	0.0114699	PREDICTED: interferon-induced protein with tetratricopeptide repeats 5-like [Danio rerio]
isotig09338	27	11	0.00774934	FCH domain only protein 2 [Danio rerio]
isotig11785	32	11	0.000971276	Bhlhe40 protein [Danio rerio]
isotig03921	40	11	2.54646e-05	oxysterol-binding protein-related protein 1 [Danio rerio]
isotig03920	40	11	2.54646e-05	Osbpl1a protein [Danio rerio]
isotig19077	44	11	3.68693e-06	glutathione peroxidase 4b [Danio rerio]
isotig28058	0	12	0.000453232	unknown [Zea mays]
isotig25404	0	12	0.000453232	secretogranin II precursor [Carassius auratus]
isotig12603	0	12	0.000453232	RNA 3&apos;-terminal phosphate cyclase [Danio rerio]
isotig22569	0	12	0.000453232	protein-kinase, interferon-inducible double stranded RNA dependent inhibitor, repressor of (P58 repressor) like [Danio rerio]
isotig28035	0	12	0.000453232	PREDICTED: hypothetical protein LOC100537913 [Danio rerio]
isotig20891	0	12	0.000453232	PREDICTED: autoimmune regulator-like [Danio rerio]
isotig09380	0	12	0.000453232	novel protein similar to vertebrate solute carrier family 6 (neurotransmitter transporter, glycine), member 9 (SLC6A9) [Danio rerio]
isotig15652	0	12	0.000453232	lysophosphatidic acid receptor 6 [Danio rerio]
isotig14328	0	12	0.000453232	GPI mannosyltransferase 3 [Danio rerio]
isotig18991	1	12	0.00112089	UDP glucuronosyltransferase 1 family, polypeptide B5 precursor [Danio rerio]
isotig15644	1	12	0.00112089	solute carrier family 25 member 39 [Danio rerio]
isotig15437	1	12	0.00112089	PREDICTED: rab GTPase-activating protein 1-like [Danio rerio]
isotig15805	1	12	0.00112089	PREDICTED: oxysterol-binding protein-related protein 5 [Danio rerio]
isotig17396	1	12	0.00112089	PREDICTED: nuclear receptor corepressor 2 [Danio rerio]
isotig13349	1	12	0.00112089	PREDICTED: nischarin [Danio rerio]
isotig13072	1	12	0.00112089	nuclear receptor subfamily 4 group A member 1 [Danio rerio]
isotig23392	1	12	0.00112089	erythrocyte membrane protein band 4.1 (elliptocytosis 1, RH-linked) [Danio rerio]
isotig12685	1	12	0.00112089	charged multivesicular body protein 3 [Ictalurus punctatus]
isotig15966	2	12	0.0052719	Wu:fk84e06 protein [Danio rerio]
isotig06427	2	12	0.0052719	Unknown (protein for IMAGE:5604373) [Danio rerio]
isotig06428	2	12	0.0052719	Unknown (protein for IMAGE:5604373) [Danio rerio]
isotig12522	2	12	0.0052719	Solute carrier family 11 (proton-coupled divalent metal ion transporters), member 2 [Danio rerio]
isotig12355	2	12	0.0052719	serine/threonine-protein kinase PLK1 [Danio rerio]
isotig15368	2	12	0.0052719	RecName: Full=Toll-interacting protein
isotig25046	2	12	0.0052719	PREDICTED: transcriptional regulator ERG-like [Anolis carolinensis]
isotig13468	2	12	0.0052719	PREDICTED: targeting protein for Xklp2-B-like [Danio rerio]
isotig25059	2	12	0.0052719	PREDICTED: sodium- and chloride-dependent GABA transporter 3-like, partial [Danio rerio]
isotig16858	2	12	0.0052719	PREDICTED: signal transducer and activator of transcription 1, partial [Danio rerio]
isotig28457	2	12	0.0052719	PREDICTED: protein kinase C alpha type [Danio rerio]
isotig07725	2	12	0.0052719	PREDICTED: olfactomedin-4-like [Danio rerio]
isotig17543	2	12	0.0052719	PREDICTED: hypothetical protein LOC100025737 [Monodelphis domestica]
isotig20533	2	12	0.0052719	PREDICTED: GTPase IMAP family member 8-like [Danio rerio]
isotig16072	2	12	0.0052719	PREDICTED: arf-GAP with SH3 domain, ANK repeat and PH domain-containing protein 1 [Danio rerio]
isotig07283	2	12	0.0052719	pleckstrin homology domain-containing family A member 1 [Danio rerio]
isotig07597	2	12	0.0052719	Nuclear receptor coactivator 5 [Salmo salar]
isotig15200	2	12	0.0052719	novel protein [Danio rerio]
isotig15476	2	12	0.0052719	novel protein (zgc:55934) [Danio rerio]
isotig09215	2	12	0.0052719	NILT3 leukocyte receptor [Oncorhynchus mykiss]
isotig17133	2	12	0.0052719	low-density lipoprotein receptor-related protein 2 [Danio rerio]
isotig15567	2	12	0.0052719	hydroxymethylbilane synthase a [Danio rerio]
isotig17491	2	12	0.0052719	glucosamine-6-phosphate isomerase 1 [Danio rerio]
isotig14457	2	12	0.0052719	coiled-coil domain-containing protein 93 [Danio rerio]
isotig21539	2	12	0.0052719	centrosomal protein of 55 kDa [Danio rerio]
isotig12471	2	12	0.0052719	CCR4-NOT transcription complex subunit 2 [Danio rerio]
isotig13046	2	12	0.0052719	BTB/POZ domain-containing protein KCTD5 [Danio rerio]
isotig14051	2	12	0.0052719	activating transcription factor 7-interacting protein 1 [Danio rerio]
isotig12607	3	12	0.0170662	vacuole membrane protein 1 [Danio rerio]
isotig12099	3	12	0.0170662	transcription factor E2F4 [Danio rerio]
isotig29952	3	12	0.0170662	sodium-dependent neutral amino acid transporter B(0)AT1 [Danio rerio]
isotig15074	3	12	0.0170662	Si:ch211-261c8.1 protein [Danio rerio]
isotig14077	3	12	0.0170662	retinoblastoma binding protein 9 [Danio rerio]
isotig07767	3	12	0.0170662	RecName: Full=Protein quaking-A; Short=zqk
isotig14320	3	12	0.0170662	putative N-acetylglucosamine-6-phosphate deacetylase [Danio rerio]
isotig07766	3	12	0.0170662	protein quaking-A [Danio rerio]
isotig17595	3	12	0.0170662	PREDICTED: ubiquitin-like modifier-activating enzyme 1-like [Danio rerio]
isotig07603	3	12	0.0170662	PREDICTED: sister chromatid cohesion protein PDS5 homolog B [Danio rerio]
isotig14815	3	12	0.0170662	PREDICTED: hypothetical protein LOC567610 [Danio rerio]
isotig08519	3	12	0.0170662	PREDICTED: histone-lysine N-methyltransferase MLL5 [Danio rerio]
isotig08367	3	12	0.0170662	PREDICTED: EGF-like module-containing mucin-like hormone receptor-like 1-like [Danio rerio]
isotig15903	3	12	0.0170662	pol-like protein [Ciona intestinalis]
isotig15915	3	12	0.0170662	Nudc protein [Danio rerio]
isotig08167	3	12	0.0170662	novel protein similar to vertebrate integrin, alpha 6 (ITGA6) [Danio rerio]
isotig12660	3	12	0.0170662	novel protein similar to Janus kinase family (a protein tyrosine kinase, leukocyte) [Danio rerio]
isotig17960	3	12	0.0170662	novel protein similar to H.sapiens PTPN18, protein tyrosine phosphatase, non-receptor type 18 (brain-derived) (PTPN18, zgc:113105) [Danio rerio]
isotig17401	3	12	0.0170662	novel protein (zgc:65774) [Danio rerio]
isotig14095	3	12	0.0170662	Kruppel-like factor 4 [Danio rerio]
isotig17990	3	12	0.0170662	iroquois homeobox protein 3b [Danio rerio]
isotig03976	3	12	0.0170662	intersectin-2 [Danio rerio]
isotig08166	3	12	0.0170662	integrin alpha-6 [Danio rerio]
isotig21093	3	12	0.0170662	general transcription factor IIB [Danio rerio]
isotig12261	3	12	0.0170662	caspase-6 [Danio rerio]
isotig11353	3	12	0.0170662	ATPase inhibitor, mitochondrial precursor [Salmo salar]
isotig20228	3	12	0.0170662	alanine--glyoxylate aminotransferase 2, mitochondrial [Danio rerio]
isotig15487	4	12	0.0425901	transcription elongation regulator 1 [Danio rerio]
isotig08430	4	12	0.0425901	trafficking protein particle complex subunit 5 [Danio rerio]
isotig12836	4	12	0.0425901	surfeit gene 4, like [Danio rerio]
isotig10475	4	12	0.0425901	protein LTV1 homolog [Danio rerio]
isotig28946	4	12	0.0425901	PREDICTED: zinc-alpha-2-glycoprotein-like [Danio rerio]
isotig13060	4	12	0.0425901	PREDICTED: UPF0498 protein KIAA1191 homolog [Danio rerio]
isotig12217	4	12	0.0425901	PREDICTED: si:ch211-208h7.4 [Danio rerio]
isotig07745	4	12	0.0425901	PREDICTED: hypothetical protein LOC564101 [Danio rerio]
isotig07467	4	12	0.0425901	PREDICTED: hypothetical protein LOC100535373 [Danio rerio]
isotig07468	4	12	0.0425901	PREDICTED: hypothetical protein LOC100535373 [Danio rerio]
isotig14938	4	12	0.0425901	PREDICTED: AT-rich interactive domain-containing protein 1A [Danio rerio]
isotig07451	4	12	0.0425901	novel protein similar to human ubiquitin-conjugating enzyme E2G 1 (UBC7 homolog, C. elegans) (UBE2G1) [Danio rerio]
isotig11875	4	12	0.0425901	novel protein (zgc:153452) [Danio rerio]
isotig05670	4	12	0.0425901	LIM domain only protein 7 [Danio rerio]
isotig12423	4	12	0.0425901	exportin-2 [Danio rerio]
isotig29889	24	12	0.0407732	Zgc:161969 protein [Danio rerio]
isotig04942	24	12	0.0407732	PREDICTED: macrophage receptor MARCO-like [Callithrix jacchus]
isotig05515	25	12	0.0287462	ribonucleoside-diphosphate reductase large subunit [Danio rerio]
isotig05516	25	12	0.0287462	ribonucleoside-diphosphate reductase large subunit [Danio rerio]
isotig11708	27	12	0.0138813	unnamed protein product [Tetraodon nigroviridis]
isotig11854	27	12	0.0138813	PREDICTED: dedicator of cytokinesis protein 8 [Danio rerio]
isotig22434	29	12	0.00647088	Rho guanine nucleotide exchange factor (GEF) 11 [Danio rerio]
isotig02912	29	12	0.00647088	PREDICTED: butyrophilin subfamily 1 member A1-like [Danio rerio]
isotig02915	29	12	0.00647088	butyrophilin-like [Danio rerio]
isotig25529	30	12	0.0043649	PREDICTED: hypothetical protein LOC100001877 [Danio rerio]
isotig03226	31	12	0.00292223	PREDICTED: endothelial PAS domain-containing protein 1 [Danio rerio]
isotig04436	33	12	0.00128238	PREDICTED: arrestin domain-containing protein 1 [Danio rerio]
isotig04437	33	12	0.00128238	PREDICTED: arrestin domain-containing protein 1 [Danio rerio]
isotig03013	42	12	2.35782e-05	PREDICTED: legumain-like [Danio rerio]
isotig08315	45	12	5.71325e-06	glutathione peroxidase 4 [Danio rerio]
isotig08316	45	12	5.71325e-06	glutathione peroxidase 4 [Danio rerio]
isotig02241	46	12	3.53395e-06	PREDICTED: legumain [Danio rerio]
isotig05708	96	12	7.6795e-18	fibronectin 1b [Danio rerio]
isotig18927	107	12	1.40418e-20	Arf-GAP with dual PH domain-containing protein 1 [Dicentrarchus labrax]
isotig08244	0	13	0.000244234	novel protein similar to a human protein associated with Myc [Danio rerio]
isotig12388	0	13	0.000244234	large proline-rich protein BAT3 [Danio rerio]
isotig08243	0	13	0.000244234	Esrom [Danio rerio]
isotig21684	0	13	0.000244234	epoxide hydrolase 2 [Danio rerio]
isotig06107	0	13	0.000244234	aldehyde dehydrogenase [Danio rerio]
isotig06108	0	13	0.000244234	aldehyde dehydrogenase [Danio rerio]
isotig18830	1	13	0.000600006	unnamed protein product [Tetraodon nigroviridis]
isotig24638	1	13	0.000600006	solute carrier family 12 member 2 isoform 1 [Danio rerio]
isotig14632	1	13	0.000600006	Smarcc1 protein [Danio rerio]
isotig13310	1	13	0.000600006	pygopus homolog 2 [Danio rerio]
isotig03346	1	13	0.000600006	PREDICTED: obscurin [Danio rerio]
isotig03347	1	13	0.000600006	PREDICTED: obscurin [Danio rerio]
isotig02401	1	13	0.000600006	PREDICTED: hypothetical protein LOC100331491 [Danio rerio]
isotig02402	1	13	0.000600006	PREDICTED: hypothetical protein LOC100331491 [Danio rerio]
isotig02403	1	13	0.000600006	PREDICTED: hypothetical protein LOC100331491 [Danio rerio]
isotig02404	1	13	0.000600006	PREDICTED: hypothetical protein LOC100331491 [Danio rerio]
isotig02405	1	13	0.000600006	PREDICTED: hypothetical protein LOC100331491 [Danio rerio]
isotig02406	1	13	0.000600006	PREDICTED: hypothetical protein LOC100331491 [Danio rerio]
isotig24616	1	13	0.000600006	PREDICTED: hypothetical protein LOC100150968 [Danio rerio]
isotig14747	1	13	0.000600006	PREDICTED: hypothetical protein LOC100002463 [Danio rerio]
isotig20069	1	13	0.000600006	P21/Cdc42/Rac1-activated kinase 1 [Danio rerio]
isotig04378	1	13	0.000600006	interferon-inducible protein Gig2 [Carassius auratus]
isotig15004	2	13	0.0029382	vacuolar protein sorting-associated protein VTA1 homolog [Danio rerio]
isotig13719	2	13	0.0029382	vacuolar protein sorting 33A [Danio rerio]
isotig10405	2	13	0.0029382	Solute carrier family 38, member 7 [Danio rerio]
isotig18281	2	13	0.0029382	rhombotin-2 [Danio rerio]
isotig14531	2	13	0.0029382	PREDICTED: tumor necrosis factor receptor superfamily member 11A-like [Danio rerio]
isotig08330	2	13	0.0029382	PREDICTED: Na(+)/H(+) exchange regulatory cofactor NHE-RF3 [Danio rerio]
isotig20385	2	13	0.0029382	PREDICTED: inositol 1,4,5-trisphosphate receptor type 1 [Danio rerio]
isotig20956	2	13	0.0029382	PREDICTED: hypothetical protein LOC799340 [Danio rerio]
isotig21305	2	13	0.0029382	PREDICTED: GTPase IMAP family member 2-like [Danio rerio]
isotig12032	2	13	0.0029382	poly [ADP-ribose] polymerase 14 [Danio rerio]
isotig13603	2	13	0.0029382	phosphatidylinositol-4-phosphate 5-kinase, type I, beta [Danio rerio]
isotig17477	2	13	0.0029382	novel protein [Danio rerio]
isotig19207	2	13	0.0029382	muscleblind-like protein 3C [Danio rerio]
isotig04757	2	13	0.0029382	lipopolysaccharide-induced tumor necrosis factor-alpha factor homolog [Danio rerio]
isotig04758	2	13	0.0029382	lipopolysaccharide-induced tumor necrosis factor-alpha factor homolog [Danio rerio]
isotig11873	2	13	0.0029382	hypothetical protein LOC792544 [Danio rerio]
isotig21518	2	13	0.0029382	hypothetical protein LOC550611 isoform 1 [Danio rerio]
isotig14909	2	13	0.0029382	Growth hormone-inducible transmembrane protein [Dicentrarchus labrax]
isotig05850	2	13	0.0029382	general transcription factor IIF, polypeptide 2a isoform 2 [Danio rerio]
isotig05849	2	13	0.0029382	general transcription factor IIF, polypeptide 2a isoform 1 [Danio rerio]
isotig24011	2	13	0.0029382	cytochrome b-c1 complex subunit 8 [Ictalurus punctatus]
isotig05771	2	13	0.0029382	A6 gene product [Mus musculus]
isotig17097	3	13	0.010026	vinexin [Danio rerio]
isotig15764	3	13	0.010026	unnamed protein product [Tetraodon nigroviridis]
isotig11542	3	13	0.010026	UDP-glucose:glycoprotein glucosyltransferase 1 [Danio rerio]
isotig13378	3	13	0.010026	syntaxin-3 [Danio rerio]
isotig15250	3	13	0.010026	SWI/SNF-related matrix-associated actin-dependent regulator of chromatin subfamily B member 1-A [Danio rerio]
isotig13195	3	13	0.010026	stromal interaction molecule 1 [Danio rerio]
isotig21779	3	13	0.010026	RecName: Full=Cytochrome c oxidase subunit 6C-1; AltName: Full=Cytochrome c oxidase polypeptide VIc-1
isotig19797	3	13	0.010026	PREDICTED: spectrin beta chain, brain 4-like [Danio rerio]
isotig12898	3	13	0.010026	PREDICTED: similar to EDIE protein [Gallus gallus]
isotig13117	3	13	0.010026	PREDICTED: NEDD4-binding protein 2-like 2-like [Danio rerio]
isotig08787	3	13	0.010026	PREDICTED: hypothetical protein LOC368753 [Danio rerio]
isotig23985	3	13	0.010026	PREDICTED: GTPase IMAP family member 8-like [Danio rerio]
isotig07166	3	13	0.010026	novel protein (zgc:56121) [Danio rerio]
isotig03081	3	13	0.010026	microtubule-associated protein, RP/EB family, member 1 [Danio rerio]
isotig13740	3	13	0.010026	hypothetical protein LOC767701 [Danio rerio]
isotig19174	3	13	0.010026	Fermt2 protein [Danio rerio]
isotig19673	3	13	0.010026	C14orf159 protein [Danio rerio]
isotig10911	4	13	0.0263725	propionyl Coenzyme A carboxylase, beta polypeptide [Danio rerio]
isotig18625	4	13	0.0263725	probable global transcription activator SNF2L1 [Danio rerio]
isotig22757	4	13	0.0263725	PREDICTED: zinc finger protein 850-like [Anolis carolinensis]
isotig06244	4	13	0.0263725	PREDICTED: NF-kappa-B inhibitor-interacting Ras-like protein 2-like [Danio rerio]
isotig06245	4	13	0.0263725	PREDICTED: NF-kappa-B inhibitor-interacting Ras-like protein 2-like [Danio rerio]
isotig08329	4	13	0.0263725	PREDICTED: Na(+)/H(+) exchange regulatory cofactor NHE-RF3 [Danio rerio]
isotig12562	4	13	0.0263725	PREDICTED: interferon-induced very large GTPase 1-like [Danio rerio]
isotig04274	4	13	0.0263725	PREDICTED: interferon-induced GTP-binding protein Mx [Danio rerio]
isotig11812	4	13	0.0263725	PREDICTED: Golgin subfamily B member 1-like [Danio rerio]
contig00592	4	13	0.0263725	PREDICTED: e3 ubiquitin-protein ligase DTX3L [Danio rerio]
isotig09309	4	13	0.0263725	PREDICTED: class I histocompatibility antigen, F10 alpha chain-like [Danio rerio]
isotig10409	4	13	0.0263725	PREDICTED: arf-GAP with dual PH domain-containing protein 2-like [Danio rerio]
isotig12991	4	13	0.0263725	phosphatidylinositol-4,5-bisphosphate 3-kinase catalytic subunit gamma isoform [Danio rerio]
isotig06114	4	13	0.0263725	NAD-dependent malic enzyme, mitochondrial [Danio rerio]
isotig06115	4	13	0.0263725	NAD-dependent malic enzyme, mitochondrial [Danio rerio]
isotig07649	4	13	0.0263725	mitochondrial Rho GTPase 2 [Danio rerio]
isotig12003	4	13	0.0263725	general transcription factor IIA, 1, 19/37kDa [Xenopus laevis]
isotig15508	4	13	0.0263725	ganglioside GM2 activator [Danio rerio]
isotig16571	4	13	0.0263725	capillary morphogenesis protein 2A [Danio rerio]
isotig20839	4	13	0.0263725	ATP synthase, H+ transporting, mitochondrial F1 complex, delta subunit [Danio rerio]
isotig11456	28	13	0.0164813	zinc finger protein Helios [Danio rerio]
isotig23039	28	13	0.0164813	PREDICTED: microfibril-associated glycoprotein 4-like isoform 1 [Danio rerio]
isotig14232	29	13	0.0114535	rho guanine nucleotide exchange factor (GEF) 1 [Danio rerio]
isotig00479	29	13	0.0114535	PREDICTED: GTPase IMAP family member 4-like [Danio rerio]
isotig06940	29	13	0.0114535	novel protein similar to vertebrate niban protein [Danio rerio]
isotig06941	29	13	0.0114535	novel protein similar to vertebrate niban protein [Danio rerio]
isotig10483	29	13	0.0114535	NAD(P) transhydrogenase, mitochondrial [Danio rerio]
isotig08391	30	13	0.00789321	probable carboxypeptidase PM20D1.2 precursor [Danio rerio]
isotig11592	30	13	0.00789321	glucosamine--fructose-6-phosphate aminotransferase [isomerizing] 2 [Danio rerio]
isotig12947	32	13	0.00366177	T-complex protein 1 subunit zeta [Danio rerio]
isotig31320	35	13	0.0010969	MHC class I antigen [Cyprinus carpio]
isotig09444	36	13	0.000724491	LETM1 domain-containing protein 1 [Danio rerio]
isotig25361	36	13	0.000724491	glutathione S-transferase pi [Carassius auratus]
contig04331	37	13	0.000475654	ORF1-encoded protein [Danio rerio]
isotig04893	563	13	8.94984e-135	PREDICTED: sodium/glucose cotransporter 5-like [Danio rerio]
isotig31916	0	14	0.00013234	unnamed protein product [Tetraodon nigroviridis]
isotig16001	0	14	0.00013234	PREDICTED: uncharacterized protein C19orf43-like isoform 1 [Danio rerio]
isotig07700	0	14	0.00013234	PREDICTED: AF4/FMR2 family member 4 [Danio rerio]
isotig07701	0	14	0.00013234	PREDICTED: AF4/FMR2 family member 4 [Danio rerio]
isotig09150	1	14	0.000321727	tetraspanin-2 [Danio rerio]
isotig17233	1	14	0.000321727	PREDICTED: clathrin interactor 1-like [Danio rerio]
isotig04379	1	14	0.000321727	interferon-inducible protein Gig2 [Carassius auratus]
isotig04380	1	14	0.000321727	interferon-inducible protein Gig2 [Carassius auratus]
isotig15473	1	14	0.000321727	hypothetical protein LOC562734 [Danio rerio]
isotig14851	1	14	0.000321727	claudin 5 [Danio rerio]
isotig10517	1	14	0.000321727	Aldh9a1a protein [Danio rerio]
isotig13885	2	14	0.00163109	zinc finger protein 865 [Danio rerio]
isotig16351	2	14	0.00163109	syndecan-2 [Danio rerio]
isotig12237	2	14	0.00163109	protein phosphatase 3, catalytic subunit, gamma isoform-like [Danio rerio]
isotig21501	2	14	0.00163109	PREDICTED: villin-1-like [Danio rerio]
isotig13469	2	14	0.00163109	PREDICTED: transmembrane protein 131 [Danio rerio]
isotig07933	2	14	0.00163109	PREDICTED: similar to breast tumor autoantigen [Ornithorhynchus anatinus]
isotig07934	2	14	0.00163109	PREDICTED: similar to breast tumor autoantigen [Ornithorhynchus anatinus]
isotig13770	2	14	0.00163109	novel protein (zgc:85685) [Danio rerio]
isotig13689	2	14	0.00163109	myxovirus (influenza virus) resistance G [Danio rerio]
isotig05778	2	14	0.00163109	MACRO domain-containing protein 2 [Danio rerio]
isotig22576	2	14	0.00163109	hypothetical protein LOC393689 [Danio rerio]
isotig17134	2	14	0.00163109	elongation of very long chain fatty acids (FEN1/Elo2, SUR4/Elo3, yeast)-like 1a [Danio rerio]
isotig08060	2	14	0.00163109	coagulation factor XIII A chain [Danio rerio]
isotig04918	3	14	0.00584262	tapasin [Danio rerio]
isotig08307	3	14	0.00584262	Putative RNA-binding protein Luc7-like 1 [Dicentrarchus labrax]
isotig16014	3	14	0.00584262	PREDICTED: WD repeat domain phosphoinositide-interacting protein 2-like isoform 1 [Monodelphis domestica]
isotig14964	3	14	0.00584262	PREDICTED: similar to clathrin-associated protein 17 [Equus caballus]
isotig11835	3	14	0.00584262	PREDICTED: hypothetical protein LOC100330848 [Danio rerio]
isotig12222	3	14	0.00584262	novel protein (zgc:113196) [Danio rerio]
isotig07233	3	14	0.00584262	LOC569187 protein [Danio rerio]
isotig17568	3	14	0.00584262	LMP7 [Danio rerio]
isotig13435	3	14	0.00584262	echinoderm microtubule-associated protein-like 2 [Danio rerio]
isotig17828	3	14	0.00584262	AP-1 complex subunit sigma-3 [Danio rerio]
isotig13755	4	14	0.0161477	Zgc:56077 protein [Danio rerio]
isotig04917	4	14	0.0161477	tapasin [Danio rerio]
isotig11767	4	14	0.0161477	PREDICTED: arginine-glutamic acid dipeptide repeats protein [Danio rerio]
isotig13744	4	14	0.0161477	hypothetical protein LOC556929 [Danio rerio]
isotig08301	4	14	0.0161477	homocysteine-responsive endoplasmic reticulum-resident ubiquitin-like domain member 2 protein [Danio rerio]
isotig20305	4	14	0.0161477	cytotoxic granule-associated RNA binding protein 1 [Danio rerio]
isotig13593	4	14	0.0161477	Acyl-Coenzyme A dehydrogenase, long chain [Danio rerio]
isotig08458	5	14	0.036873	troponin C [Siniperca chuatsi]
isotig13807	5	14	0.036873	STE20-like serine/threonine-protein kinase [Danio rerio]
isotig13887	5	14	0.036873	something about silencing protein 10 [Danio rerio]
isotig04946	5	14	0.036873	Purinergic receptor P2X, ligand-gated ion channel, 1 [Danio rerio]
isotig04947	5	14	0.036873	Purinergic receptor P2X, ligand-gated ion channel, 1 [Danio rerio]
isotig11535	5	14	0.036873	PREDICTED: protein ELYS [Danio rerio]
isotig07136	5	14	0.036873	PREDICTED: hypothetical protein LOC321872 [Danio rerio]
isotig21712	5	14	0.036873	PREDICTED: hypothetical protein LOC100126232 [Danio rerio]
isotig13662	5	14	0.036873	PREDICTED: e3 ubiquitin-protein ligase Arkadia-like [Danio rerio]
isotig12038	5	14	0.036873	LOC553285 protein [Danio rerio]
isotig15539	5	14	0.036873	F-box-like/WD repeat-containing protein TBL1X [Danio rerio]
isotig11003	5	14	0.036873	eukaryotic translation initiation factor 4E-binding protein 3-like [Danio rerio]
isotig12365	5	14	0.036873	AP-1 complex subunit beta-1 [Danio rerio]
isotig16002	5	14	0.036873	aldehyde dehydrogenase 1 family, member L1 [Danio rerio]
isotig07207	28	14	0.0271224	PREDICTED: extracellular matrix protein 1-like [Danio rerio]
isotig10482	29	14	0.0192524	NAD(P) transhydrogenase, mitochondrial [Danio rerio]
isotig04081	32	14	0.00654457	interleukin 13 receptor, alpha 1 [Danio rerio]
isotig04082	32	14	0.00654457	interleukin 13 receptor, alpha 1 [Danio rerio]
isotig14042	33	14	0.00449652	anion exchanger Ae2.1 [Danio rerio]
isotig12138	37	14	0.000934811	sodium-dependent phosphate transporter 1-B [Danio rerio]
isotig22112	39	14	0.00041051	PREDICTED: legumain-like [Danio rerio]
isotig16105	52	14	1.21373e-06	PREDICTED: two pore calcium channel protein 1 [Danio rerio]
isotig24665	0	15	7.2086e-05	unnamed protein product [Tetraodon nigroviridis]
isotig22257	0	15	7.2086e-05	PREDICTED: zinc finger protein 319 [Danio rerio]
isotig04372	0	15	7.2086e-05	PREDICTED: hypothetical protein LOC100537913 [Danio rerio]
isotig04374	0	15	7.2086e-05	PREDICTED: hypothetical protein LOC100537913 [Danio rerio]
isotig08082	0	15	7.2086e-05	Mitochondrial ribosomal protein S34 [Danio rerio]
isotig15588	0	15	7.2086e-05	connector enhancer of kinase suppressor of ras 1 [Danio rerio]
isotig14339	1	15	0.000172831	Zcchc7l protein [Danio rerio]
isotig05799	1	15	0.000172831	splicing factor, arginine/serine-rich 3 [Danio rerio]
isotig12844	1	15	0.000172831	SH3-binding domain protein 5-like, a [Danio rerio]
isotig14677	1	15	0.000172831	serine/threonine-protein kinase 24 [Danio rerio]
isotig16883	1	15	0.000172831	PREDICTED: sushi domain-containing protein 1-like [Danio rerio]
isotig19053	1	15	0.000172831	PREDICTED: MLX-interacting protein [Danio rerio]
isotig24244	1	15	0.000172831	PREDICTED: class I histocompatibility antigen, F10 alpha chain-like [Danio rerio]
isotig18855	1	15	0.000172831	mesencephalic astrocyte-derived neurotrophic factor [Danio rerio]
isotig10710	1	15	0.000172831	histone-lysine N-methyltransferase EZH2 [Danio rerio]
isotig25403	1	15	0.000172831	Gig2-like protein DreI [Danio rerio]
isotig15729	2	15	0.000902519	proteasome subunit beta type-10 [Danio rerio]
isotig10240	2	15	0.000902519	PREDICTED: novel protein containing immunoglobulin domains [Danio rerio]
isotig09592	2	15	0.000902519	PREDICTED: EGF-like module-containing mucin-like hormone receptor-like 1-like [Danio rerio]
isotig13081	2	15	0.000902519	hypothetical protein LOC556313 [Danio rerio]
isotig10623	3	15	0.00338092	unnamed protein product [Tetraodon nigroviridis]
isotig10980	3	15	0.00338092	sulfotransferase 6B1 [Danio rerio]
isotig15343	3	15	0.00338092	Purinergic receptor P2X, ligand-gated ion channel, 4a [Danio rerio]
isotig05783	3	15	0.00338092	proteasome maturation protein [Danio rerio]
isotig15501	3	15	0.00338092	PREDICTED: WD repeat-containing protein 5-like [Callithrix jacchus]
isotig08431	3	15	0.00338092	OTU domain-containing protein 5-A [Danio rerio]
isotig13363	3	15	0.00338092	novel protein similar to vertebrate LAS1-like (S. cerevisiae) (LAS1L) [Danio rerio]
isotig17117	3	15	0.00338092	IKAROS family zinc finger 1 (Ikaros) [Danio rerio]
isotig18478	3	15	0.00338092	complement C1q subcomponent subunit B [Danio rerio]
isotig07675	4	15	0.00978916	spermine synthase [Danio rerio]
[truncated: 1,232 more rows]
